# Supplementary material for: Experience of the COVID-19 Pandemic in Rural Odisha, India: Knowledge, Preventative Actions, and Impacts on Daily Life
Source: MDPI journal article supplement (doi:10.3390/ijerph18062863), 2021-03-11
Supplement: s1 [file s1]

## **PHONE INTERVIEW TOOLS USED FOR:**

### **Experience of the COVID-19 pandemic in rural Odisha, India: knowledge, preventative actions, and impacts on daily life**

Valerie Bauza,<sup>1,\*</sup> Gloria Sclar,<sup>1,2</sup> Alokanda Bisoyi,<sup>3</sup> Ajilé Owens,<sup>4</sup> Apurva Ghugey,<sup>5</sup> Thomas Clasen<sup>1</sup>

<sup>1</sup> Department of Environmental Health, Rollins School of Public Health, Emory University, Atlanta, GA, United States of America

<sup>2</sup> Department of Psychology, University of Zürich, Switzerland

<sup>3</sup> Independent Consultant, Berhampur, Odisha, India

<sup>4</sup> Department of Epidemiology, Rollins School of Public Health, Emory University, Atlanta, GA, United States of America

<sup>5</sup> Gram Vikas, Bhubaneswar, Odisha, India

\*Corresponding author email: [valerie.bauza@emory.edu](mailto:valerie.bauza@emory.edu)

#### Semi-structured interview tools

Head of household: Page 2

Village water and sanitation committee member: Page 17

Primary caregiver: Page 38

## COVID-19 Mobile Phone Interview – Head of Household

| SECTION A: Respondent and Enumerator Information & Consent Process                                                                                                                                                                                                                                                            |                                                                                                                                                                                                                                                                                                                                                                                                                                                                                                                                                                                                |
|-------------------------------------------------------------------------------------------------------------------------------------------------------------------------------------------------------------------------------------------------------------------------------------------------------------------------------|------------------------------------------------------------------------------------------------------------------------------------------------------------------------------------------------------------------------------------------------------------------------------------------------------------------------------------------------------------------------------------------------------------------------------------------------------------------------------------------------------------------------------------------------------------------------------------------------|
| A1. Village ID ଗ୍ରାମ ର କୋଡ୍:                                                                                                                                                                                                                                                                                                  | A2. Household ID ଘର ଘରର ସଂଖ୍ୟା                                                                                                                                                                                                                                                                                                                                                                                                                                                                                                                                                                 |
| A3. Village Name ଗ୍ରାମ ର ନାମ                                                                                                                                                                                                                                                                                                  |                                                                                                                                                                                                                                                                                                                                                                                                                                                                                                                                                                                                |
| A4. Date ତାରିଖ                                                                                                                                                                                                                                                                                                                | (y/d/m)                                                                                                                                                                                                                                                                                                                                                                                                                                                                                                                                                                                        |
| A5. Start Time ଆରମ୍ଭ ସମୟ                                                                                                                                                                                                                                                                                                      |                                                                                                                                                                                                                                                                                                                                                                                                                                                                                                                                                                                                |
| A6. Enumerator name ଆପଣଙ୍କ ନାମ                                                                                                                                                                                                                                                                                                | <input type="checkbox"/> 1. Alok<br><input type="checkbox"/> 2. Dhiren<br><input type="checkbox"/> 3. Varsha                                                                                                                                                                                                                                                                                                                                                                                                                                                                                   |
| <b>A7. Confirm that the respondent and their family (if applicable) currently live in the intended village (and are not currently staying somewhere else).</b><br><br>ପୁଷ୍ଟି କରନ୍ତୁ କି ଯେ, ଉପଯୁକ୍ତ ଉତ୍ତରଦାତା ଏବଂ ତାଙ୍କ ପରିବାର (ଯଦି ଲାଗୁ ହୁଏ) ବର୍ତ୍ତମାନ ଉଦ୍ଦିଷ୍ଟ ଗ୍ରାମରେ ହିଁ ବସବାସ କରନ୍ତି (ଏବଂ ଅନ୍ୟ କେଉଁଠି ବସବାସ କରନ୍ତି ନାହିଁ) | <input type="checkbox"/> 1. Yes ହଁ<br><input type="checkbox"/> 2. No – respondent/family are staying outside the village and left <i>before</i> the pandemic → <b>END SURVEY</b><br>ନା - ଉତ୍ତରଦାତା ଓ ତାଙ୍କ ପରିବାର ଗ୍ରାମ ବାହାରେ ବସବାସ କରନ୍ତି ଏବଂ ସର୍ବବ୍ୟାପୀ ମହାମାରୀ ହେବା ପୂର୍ବରୁ ଗ୍ରାମ ଛାଡି ଦେଇଛନ୍ତି - ସତର୍କ ଶେଷ<br><input type="checkbox"/> 3. No – respondent/family are staying outside the village and left <i>because of</i> the pandemic → <b>END SURVEY</b><br>ନା- ଉତ୍ତରଦାତା ଓ ତାଙ୍କ ପରିବାର ଗ୍ରାମ ବାହାରେ ବସବାସ କରନ୍ତି ଏବଂ ସର୍ବବ୍ୟାପୀ ମହାମାରୀ ହେବା କାରଣରୁ ଗ୍ରାମ ଛାଡି ଦେଇଛନ୍ତି - ସତର୍କ ଶେଷ |
| <b>A8a. Read the consent form to the respondent and then ask for their consent to participate.</b><br><br>ଉତ୍ତରଦାତାଙ୍କ ପାଇଁ ସହମତି ପତ୍ରଟିକୁ ପଢନ୍ତୁ ଏବଂ ତାଙ୍କୁ ସତର୍କରେ ଅଂଶଗ୍ରହଣ ପାଇଁ ସହମତି ମାଗନ୍ତୁ।<br><br>Does the respondent consent to the survey?<br>କ'ଣ ଉତ୍ତରଦାତା ସତର୍କରେ ଅଂଶଗ୍ରହଣ ପାଇଁ ସହମତି ପ୍ରଦାନ କଲେ?                  | <input type="checkbox"/> 1. Yes ହଁ<br><input type="checkbox"/> 2. No → <b>END SURVEY</b> ନା - ସତର୍କ ଶେଷ                                                                                                                                                                                                                                                                                                                                                                                                                                                                                        |
| <b>A8b. Does the respondent consent to having the phone call audio recorded?</b><br><br>କଣ ଉତ୍ତରଦାତା ଫୋନକଲର ରେକର୍ଡିଙ୍ଗ ପାଇଁ ସହମତି ପ୍ରଦାନ କଲେ?                                                                                                                                                                                 | <input type="checkbox"/> 1. Yes ହଁ<br><input type="checkbox"/> 2. No ନା → Pause when you need to in order to record detailed responses! ଯେତେବେଳେ ଉତ୍ତର ଲେଖିବା ଆବଶ୍ୟକ ପଡେ, ବିରାମ ନିଅନ୍ତୁ।                                                                                                                                                                                                                                                                                                                                                                                                       |
| <b>ENUMERATOR NOTE:</b> Now you are going to begin the survey.<br>ଏନ୍ୟୁମେରେଟରଙ୍କ ପାଇଁ ନୋଟ: ବର୍ତ୍ତମାନ ଆପଣ ସତର୍କ ଆରମ୍ଭ କରିବେ                                                                                                                                                                                                    |                                                                                                                                                                                                                                                                                                                                                                                                                                                                                                                                                                                                |
| A9. What is your name?<br>ଆପଣଙ୍କ ନାମ କଣ ?                                                                                                                                                                                                                                                                                     |                                                                                                                                                                                                                                                                                                                                                                                                                                                                                                                                                                                                |

## COVID-19 Mobile Phone Interview – Head of Household

|                                                                                                                                                                                                                        |                                                                                                                                                                                                                                                                                                          |
|------------------------------------------------------------------------------------------------------------------------------------------------------------------------------------------------------------------------|----------------------------------------------------------------------------------------------------------------------------------------------------------------------------------------------------------------------------------------------------------------------------------------------------------|
| <p><b>A10. What is the sex of the respondent?</b><br/>ଉତ୍ତରଦାତାଙ୍କ ଲିଙ୍ଗ କଣ?</p> <p>Enumerator Note: Clarify with the respondent if you are not sure.<br/>ଏନ୍ୟୁମରେଟର ନୋଟ - ସ୍ପଷ୍ଟ କରନ୍ତୁ ଯେବେ ଆପଣ ନିଶ୍ଚିତ ନୁହଁନ୍ତି</p> | <p><input type="checkbox"/> 1. Male ପୁରୁଷ</p> <p><input type="checkbox"/> 2. Female ମହିଳା</p>                                                                                                                                                                                                            |
| <p><b>A11. What is your age?</b><br/>ଆପଣଙ୍କ ବୟସ କେତେ?</p>                                                                                                                                                              | <p style="text-align: center;">(years) (ବର୍ଷ)</p>                                                                                                                                                                                                                                                        |
| <p><b>A12. Including yourself, how many people are currently staying in your house?</b><br/>ଆପଣଙ୍କୁ ମିଶେଇ, ବର୍ତ୍ତମାନ ଆପଣଙ୍କ ଘରେ କେତେଜଣ ଲୋକ ରୁହନ୍ତି?</p>                                                                |                                                                                                                                                                                                                                                                                                          |
| <p><b>A13. Are there any children &lt;5 years currently living in your household?</b><br/>କଣ ପାଞ୍ଚ ବର୍ଷରୁ କମ ବୟସର କେହି ପିଲା ବର୍ତ୍ତମାନ ଏହି ଘରେ ବସବାସ କରନ୍ତି କି?</p>                                                     | <p><input type="checkbox"/> 1. Yes ହଁ</p> <p><input type="checkbox"/> 2. No ନାହିଁ</p> <p><b><u>If yes, children ages:</u></b></p> <p>Child 1: Years: _____ Months: _____</p> <p>Child 2: Years: _____ Months: _____</p> <p>Child 3: Years: _____ Months: _____</p>                                       |
| <p><b>A14. How many people living in your household are over 60 years old?</b><br/>ଆପଣଙ୍କ ଘରେ ରହୁଥିବା ସଦସ୍ୟ ମାନଙ୍କ ମଧ୍ୟରୁ କେତେ ଜଣଙ୍କ ବୟସ ୬୦ ବର୍ଷରୁ ଉର୍ଦ୍ଧ୍ବ?</p>                                                       |                                                                                                                                                                                                                                                                                                          |
| <p><b>A15. How many people living in your household are currently pregnant?</b><br/>ଆପଣଙ୍କ ଘରେ ରହୁଥିବା ସଦସ୍ୟ ମାନଙ୍କ ମଧ୍ୟରୁ କେତେ ଜଣ ଗର୍ଭବତୀ?</p>                                                                        |                                                                                                                                                                                                                                                                                                          |
| <p><b>A16. Is anyone in your household a daily wage labourer who usually works in another state?</b><br/>କଣ ଆପଣଙ୍କ ଘରର କେହି ଦିନ ମଜୁରିଆ ଅଟନ୍ତି କି ଯେ ସାଧାରଣତଃ ଅନ୍ୟ ରାଜ୍ୟରେ କାମ କରନ୍ତି ?</p>                             | <p><input type="checkbox"/> 1. Yes ହଁ - And they are still residing in another state ହଁ- ସେମାନେ ବର୍ତ୍ତମାନ ମଧ୍ୟ ଅନ୍ୟ ରାଜ୍ୟରେ ରହୁଛନ୍ତି</p> <p><input type="checkbox"/> 2. Yes ହଁ - But now they reside in Odisha ହଁ- କିନ୍ତୁ ସେମାନେ ବର୍ତ୍ତମାନ ଓଡ଼ିଶାରେ ରୁହନ୍ତି</p> <p><input type="checkbox"/> 3. No ନା</p> |

## COVID-19 Mobile Phone Interview – Head of Household

|                                                                                                                                                                                                                                                                                                                                        |                                                                                                                                                                                                                                                                                                                                                                                                                                                                                                                                                                                                                                                                                                                                                                                                                                                                                                                                                                                                                                                                                                                                                                                                                                                                                                                                                                                                                                                             |
|----------------------------------------------------------------------------------------------------------------------------------------------------------------------------------------------------------------------------------------------------------------------------------------------------------------------------------------|-------------------------------------------------------------------------------------------------------------------------------------------------------------------------------------------------------------------------------------------------------------------------------------------------------------------------------------------------------------------------------------------------------------------------------------------------------------------------------------------------------------------------------------------------------------------------------------------------------------------------------------------------------------------------------------------------------------------------------------------------------------------------------------------------------------------------------------------------------------------------------------------------------------------------------------------------------------------------------------------------------------------------------------------------------------------------------------------------------------------------------------------------------------------------------------------------------------------------------------------------------------------------------------------------------------------------------------------------------------------------------------------------------------------------------------------------------------|
| <p><b>A17.</b> Do you or any other family member have any of the following conditions or diseases?</p> <p>ଆପଣଙ୍କୁ ଅଥବା ଆପଣଙ୍କ ପରିବାରର କେହି ସଦସ୍ୟଙ୍କୁ ଉକ୍ତ ରୋଗ ଅଛି କି?</p> <p>Enumerator note: Read each option and select all that apply.<br/>ଏମିତିରେଟରଙ୍କ ପାଇଁ ନୋଟ: ବିକଳ ଉତ୍ତର ଗୁଡ଼ିକୁ ପଢନ୍ତୁ।<br/>ଦେଇଥିବା ସମସ୍ତ ଉତ୍ତରକୁ ବାଛିନ୍ତୁ</p> | <div style="display: flex; flex-direction: row;"> <div style="flex: 1;"> <input type="checkbox"/> 1. Asthma ଶ୍ୱାସ<br/> <input type="checkbox"/> 2. Diabetes ମଧୁମେହ<br/> <input type="checkbox"/> 3. Obesity ମୋଟାପି<br/> <input type="checkbox"/> 4. Kidney disease ବୃକକ ରୋଗ<br/> <input type="checkbox"/> 5. Heart disease ହୃଦରୋଗ<br/> <input type="checkbox"/> 6. Liver disease ଯକୃତ ରୋଗ<br/> <input type="checkbox"/> 7. Chronic lung disease ଦୀର୍ଘକାଳୀନ ପୁସ୍ତପୁସ ରୋଗ<br/> <input type="checkbox"/> 8. Cancer କ୍ୟାନ୍ସର<br/> <input type="checkbox"/> 9. None କିଛି ନାହିଁ </div> </div>                                                                                                                                                                                                                                                                                                                                                                                                                                                                                                                                                                                                                                                                                                                                                                                                                                                                     |
| <p><b>A18.</b> Do you have piped water to your household or compound?</p> <p>କଣ ଆପଣଙ୍କ ଘରକୁ ପାଇପ ଯୋଗେ ପାଣିର ବ୍ୟବସ୍ଥା ଅଛି?</p>                                                                                                                                                                                                          | <div style="display: flex; flex-direction: row;"> <div style="flex: 1;"> <input type="checkbox"/> 1. Yes – functional ହଁ- ସକ୍ରିୟ<br/> <input type="checkbox"/> 2. Yes – not functional ହଁ- ନିଷ୍କ୍ରିୟ<br/> <input type="checkbox"/> 3. No ନା </div> </div> <p><b>If 2 or 3:</b><br/>What is your primary source of water and where is it located?</p> <p><b>ଯଦି 2 କିମ୍ବା 3:</b><br/>ଆପଣଙ୍କ ଘରର ମୁଖ୍ୟ ଜଳଉତ୍ସର୍ଗ କଣ ଓ ଏହା କେଉଁଠି ଅବସ୍ଥିତ?</p> <p><b>Source (ଉତ୍ସ):</b></p> <div style="display: flex; flex-direction: row;"> <div style="flex: 1;"> <input type="checkbox"/> 1. Public tap ପବ୍ଲିକ୍‌ଟାପ/ସର୍ବସାଧାରଣଟ୍ୟାପ୍<br/> <input type="checkbox"/> 2. Well/borehole/spring କୂଅ, ନଳକୂଅ, ଝରଣା<br/> <input type="checkbox"/> 3. Surface water (river/dam/lake/pond/stream/canal)<br/> <span style="font-size: small;">ଭୂତଳଜଳ(ନଦୀ/ବନ୍ଧ/ସ୍ରୋତ/ପୋଖରୀ/ନାଳ/କେନାଲ)</span><br/> <input type="checkbox"/> 4. Rainwater ବର୍ଷାପାଣି<br/> <input type="checkbox"/> 5. Bottled water ବୋତଲପାଣି<br/> <input type="checkbox"/> 6. Other ଅନ୍ୟାନ୍ୟ<br/> <input type="checkbox"/> 7. Don't know ଜାଣିନାହିଁ </div> </div> <p><b>Location: ଅବସ୍ଥାନ</b></p> <div style="display: flex; flex-direction: row;"> <div style="flex: 1;"> <input type="checkbox"/> 1. In own dwelling ନିଜ ରହିବା ଜାଗାରେ<br/> <input type="checkbox"/> 2. In own yard/plot/compound ନିଜଜାଗା/ପ୍ଲଟରେ/ଅଗଣାରେ<br/> <input type="checkbox"/> 3. Outside the household compound ଘର ଅଗଣା/ପରିସର ବାହାରେ </div> </div> |
| <p><b>A19.</b> Does your household have a latrine?</p> <p>କଣ ଆପଣଙ୍କ ଘରେ ପାଇଖାନା ଅଛି?</p>                                                                                                                                                                                                                                               | <div style="display: flex; flex-direction: row;"> <div style="flex: 1;"> <input type="checkbox"/> 1. Yes – functional ହଁ- ସକ୍ରିୟ<br/> <input type="checkbox"/> 2. Yes – not functional ହଁ- ନିଷ୍କ୍ରିୟ<br/> <input type="checkbox"/> 3. No ନାହିଁ </div> </div>                                                                                                                                                                                                                                                                                                                                                                                                                                                                                                                                                                                                                                                                                                                                                                                                                                                                                                                                                                                                                                                                                                                                                                                                |
| <p><b>A20.</b> Do you have an enclosed bathing area in your household compound?</p> <p>କଣ ଆପଣଙ୍କ ଘର ପରିସର ମଧ୍ୟରେ ଏକ ଆବଦ୍ଧ ଗାଧୁଆଘର ଅଛି କି?</p>                                                                                                                                                                                          | <div style="display: flex; flex-direction: row;"> <div style="flex: 1;"> <input type="checkbox"/> 1. Yes ହଁ<br/> <input type="checkbox"/> 2. No ନା </div> </div>                                                                                                                                                                                                                                                                                                                                                                                                                                                                                                                                                                                                                                                                                                                                                                                                                                                                                                                                                                                                                                                                                                                                                                                                                                                                                            |

## COVID-19 Mobile Phone Interview – Head of Household

### SECTION B: COVID-19 Knowledge, Perceptions, and Actions

**Enumerator read:** Thank you for your responses so far. Now I'm going to ask you some questions related to coronavirus.

ଏନ୍ୟୁମେରେଟର ପଢନ୍ତୁ : ବର୍ତ୍ତମାନ ପର୍ଯ୍ୟନ୍ତ ଦେଇଥିବା ଉତ୍ତର ମାନଙ୍କ ପାଇଁ ଧନ୍ୟବାଦ। ବର୍ତ୍ତମାନ, ମୁଁ ଆପଣଙ୍କୁ କରୋନାଭାଇରସ ସହିତ ଜଡ଼ିତ କିଛି ପ୍ରଶ୍ନ ପଚାରିବି।

**B1. Have you heard of a disease called covid-19, coronavirus, or corona?**

କଣ ଆପଣ କୋଭିଡ-୧୯, କରୋନା-ଭାଇରସ କିମ୍ବା କରୋନା ନାମକ ରୋଗ ବିଷୟରେ ଶୁଣିଛନ୍ତି?

- ☐ 1. Yes ହଁ
- ☐ 2. No → If no, explain that this is the disease that has led to the recent lockdowns in India.  
ନା- ଯଦି ନା, ତାହେଲେ ଏହା କୁହନ୍ତୁ କି ଯେ ଏହି ରୋଗ ପାଇଁ ହିଁ ଏବେ ଭାରତରେ ଲକ-ଡାଉନ ହୋଇଛି

**B2. What are the symptoms of coronavirus?**

କରୋନା ଭାଇରସର ଲକ୍ଷଣ ଗୁଡ଼ିକ କଣ?

Enumerator notes:

Do **NOT** read response options. Select all that apply.

ସମ୍ଭାବ୍ୟ ଉତ୍ତର ଗୁଡ଼ିକ ପଢନ୍ତୁ ନାହିଁ। ଦେଇଥିବା ଉତ୍ତର ଗୁଡ଼ିକୁ ଟୀକ କରନ୍ତୁ।

Probe: Anything else?

ପ୍ରୋବ : ଆଉ କିଛି?

If respondent says sick/flu as their response, ask them to specify specific symptoms.

ଯଦି ଉତ୍ତରଦାତା ଅସୁସ୍ଥ ଲାଗିବା/ ଥଣ୍ଡା ହେବା ବିଷୟରେ କୁହନ୍ତି, ତାଙ୍କୁ ନିର୍ଦ୍ଦିଷ୍ଟ ଲକ୍ଷଣ ଗୁଡ଼ିକ ବିଷୟରେ କହିବାକୁ କୁହନ୍ତୁ

- ☐ 1. No symptoms କିଛି ଲକ୍ଷଣ ନାହିଁ
- ☐ 2. Fever ଜ୍ୱର
- ☐ 3. Cough କାଶ
- ☐ 4. Dry cough ଶୁଷ୍କ ଲା କାସ
- ☐ 5. Headache ମୁଣ୍ଡବଥା
- ☐ 6. Body aches ଶରୀର ବ୍ୟଥା
- ☐ 7. Difficulty breathing ନିଶ୍ୱାସ ନେବାରେ ଅସୁବିଧା
- ☐ 8. Chest pain ଛାତି ଯନ୍ତ୍ରଣା
- ☐ 9. Tiredness ଲାଜି
- ☐ 10. Diarrhea ଡାକରିଆ
- ☐ 11. Chills ଥଣ୍ଡା ଲାଗିବା
- ☐ 12. Rash କୁଣ୍ଡିଆ
- ☐ 13. Loss of smell and/or taste ଗନ୍ଧ କିମ୍ବା ସ୍ୱାଦ ବାରିପାରୁନାହାନ୍ତି
- ☐ 14. Dizziness ମୁଣ୍ଡ ବୁଲେଇବା
- ☐ 15. Sneezing ଛିଙ୍କ/ଢିଙ୍କ
- ☐ 16. Sore throat ଖରାପ ଗଳ
- ☐ 88. Other ଅନ୍ୟାନ୍ୟ:
- ☐ 99. Don't know ଜାଣିନାହିଁ

**B3. What causes a person to get sick with coronavirus?**

କେଉଁ କାରଣ ମାନଙ୍କ ପାଇଁ ଜଣଙ୍କୁ କରୋନା ଭାଇରସ ହୋଇଥାଏ?

Enumerator note: Probe for respondent to describe in detail. If the respondent is having trouble answering, ask: "What actions would increase your risk of getting coronavirus? Why?"

ଏନ୍ୟୁମେରେଟରଙ୍କ ପାଇଁ ନୋଟ: ଉତ୍ତରଦାତାଙ୍କୁ ବର୍ଣ୍ଣନା କରିବା ପାଇଁ ଅନୁସନ୍ଧାନ କରନ୍ତୁ। ଯଦି ଉତ୍ତରଦାତାଙ୍କୁ ଉତ୍ତର ଦେବାରେ ଅସୁବିଧା ହେଉଥାଏ, ପଚାରନ୍ତୁ, "କେଉଁ କମ ଆପଣଙ୍କର କରୋନାଭାଇରସ ହେବାର ଆଶଙ୍କାକୁ ବଢ଼େଇଦେଇଥାଏ? କାହିଁକି?"

## COVID-19 Mobile Phone Interview – Head of Household

|                                                                                                                                                                                                                                                                                                                                                                                                                                                                                                                                                               |                                                                                                                                                                                                                                                                                                                                                                                                                                                                                                                                                                                                                                                                                                                                                                                                                                                                                |
|---------------------------------------------------------------------------------------------------------------------------------------------------------------------------------------------------------------------------------------------------------------------------------------------------------------------------------------------------------------------------------------------------------------------------------------------------------------------------------------------------------------------------------------------------------------|--------------------------------------------------------------------------------------------------------------------------------------------------------------------------------------------------------------------------------------------------------------------------------------------------------------------------------------------------------------------------------------------------------------------------------------------------------------------------------------------------------------------------------------------------------------------------------------------------------------------------------------------------------------------------------------------------------------------------------------------------------------------------------------------------------------------------------------------------------------------------------|
| <p><b>B4. Are there any cures or treatments for coronavirus disease?</b><br/>କ'ଣ କରୋନା ଭାଇରସର କିଛି ଉପଶମ କିମ୍ବା ଚିକିତ୍ସା ଅଛି କି?</p> <p>If yes, please describe these cures or treatments.<br/>ଯଦି ହଁ, ଏହି ଉପଶମ କିମ୍ବା ଚିକିତ୍ସା ଗୁଡ଼ିକୁ ବର୍ଣ୍ଣନା କରନ୍ତୁ</p> <p>Enumerator note: If the respondent describes their answer, please take notes on their response even if they respond 'no' or 'don't know'.</p> <p>ଏନ୍ୟୁମେରେଟର ନୋଟ : ଯଦି ଉତ୍ତରଦାତା ତାଙ୍କ ଉତ୍ତରକୁ ବର୍ଣ୍ଣନା କରନ୍ତି, ତାଙ୍କ ଉତ୍ତରକୁ ଚିପନ୍ତୁ ଯଦିଓ ସେମାନେ 'ନାହିଁ' କିମ୍ବା 'ଜଣା ନାହିଁ' ଉତ୍ତର ଦିଅନ୍ତି।</p> | <div style="margin-bottom: 10px;"> <input type="checkbox"/> 1. Yes ହଁ<br/> <input type="checkbox"/> 2. No ନାହିଁ<br/> <input type="checkbox"/> 99. Don't know ଜଣାନାହିଁ         </div> <p><b><u>Please describe:</u></b><br/><b><u>ବର୍ଣ୍ଣନାକରି ବର୍ଣ୍ଣନା କରନ୍ତୁ</u></b></p>                                                                                                                                                                                                                                                                                                                                                                                                                                                                                                                                                                                                       |
| <p><b>B5. Do you think your personal chance of getting coronavirus is low, medium, high, or do you have no risk at all? Explain why.</b></p> <p>ଆପଣଙ୍କୁ ଲାଗୁଛି କି ଯେ ଆପଣଙ୍କୁ କରୋନାଭାଇରସ ହେବାର ବ୍ୟକ୍ତିଗତ ସମ୍ଭାବନା କମ, ମଧ୍ୟମ, ଅଧିକ ଅଥବା ଆପଣଙ୍କ ପ୍ରତି କିଛି ବି ବିପଦ ନାହିଁ? ବର୍ଣ୍ଣନା କରନ୍ତୁ କାହିଁକି।</p>                                                                                                                                                                                                                                                           | <div style="margin-bottom: 10px;"> <input type="checkbox"/> 1. Low କମ<br/> <input type="checkbox"/> 2. Medium ମାଧ୍ୟମ<br/> <input type="checkbox"/> 3. High ଅଧିକ<br/> <input type="checkbox"/> 4. No risk କିଛି ବିପଦ ନୁହେଁ<br/> <input type="checkbox"/> 99. Don't know ଜାଣିନାହିଁ         </div> <p><b><u>Explain why: ବର୍ଣ୍ଣନା କରନ୍ତୁ କାହିଁକି</u></b></p>                                                                                                                                                                                                                                                                                                                                                                                                                                                                                                                       |
| <p><b>B6. In the past 7 days, what actions have you and your family taken to avoid getting coronavirus, if any?</b></p> <p>ଗତ ସାତଦିନ ମଧ୍ୟରେ, ଆପଣ ଓ ଆପଣଙ୍କ ପରିବାରର ସଦସ୍ୟ ମାନେ ନିଜକୁ କରୋନା ଭାଇରସରୁ ଦୂରେଇ ରଖିବାକୁ କଣ ପଦକ୍ଷେପ ନେଇଛନ୍ତି?</p>                                                                                                                                                                                                                                                                                                                       |                                                                                                                                                                                                                                                                                                                                                                                                                                                                                                                                                                                                                                                                                                                                                                                                                                                                                |
| <p><b>B7. In the past 7 days, what actions have you and your family taken to avoid getting coronavirus, if any? I am going to read a list of actions. For each one, please tell me yes or no.</b></p> <p>ଗତ ସାତ ଦିନ ମଧ୍ୟରେ, ଆପଣ ଓ ଆପଣଙ୍କ ପରିବାରର ସଦସ୍ୟ ମାନେ ନିଜକୁ କରୋନାଭାଇରସରୁ ଦୂରେଇ ରଖିବାକୁ କଣ ପଦକ୍ଷେପ ନେଇଛନ୍ତି? ମୁଁ କିଛି ପଦକ୍ଷେପ ପଢୁଛି। ପ୍ରତିଟି ପଦକ୍ଷେପ ପାଇଁ ହଁ କିମ୍ବା ନାହିଁ କୁହନ୍ତୁ।</p> <p>Enumerator note: Select each action that the</p>                                                                                                               | <div style="margin-bottom: 10px;"> <input type="checkbox"/> 1. Stayed at home as much as possible<br/>ଯେତେ ପାରିଲେ, ଘରେ ରହିଛନ୍ତି         </div> <div style="margin-bottom: 10px;"> <input type="checkbox"/> 2. Did not attend school or work<br/>ସ୍କୁଲ କିମ୍ବା କାମକୁ ଯାଇନାହାନ୍ତି         </div> <div style="margin-bottom: 10px;"> <input type="checkbox"/> 3. Did not attend social gatherings (e.g., weddings, funerals, church, temple)<br/>ସାମାଜିକ ସମାବେଶକୁ ଯାଇନାହାନ୍ତି (ଉଦାହରଣ : ବିବାହ, ଅନ୍ତିମ ସଂସ୍କାର, ଗୀର୍ଜାଘର, ମନ୍ଦିର)         </div> <div style="margin-bottom: 10px;"> <input type="checkbox"/> 4. Kept a distance from others → What distance? _____ meters<br/>ଅନ୍ୟ ମାନଙ୍କ ଠାରୁ ଦୂରରେ ରକ୍ଷା କରିଛନ୍ତି – କେତେ ମିଟର ଦୂରରେ         </div> <div style="margin-bottom: 10px;"> <input type="checkbox"/> 5. Washed hands/used hand sanitizer more frequently         </div> |

## COVID-19 Mobile Phone Interview – Head of Household

|                                                                                                                                                                                                                                                                                                                                                              |                                                                                                                                                                                                                                                                                                                                                                                                                                                                                                                                                                                                                                                                                                                                                                                                                                                                                                                                                                                                                                                                                                                                                                                                                                                                                                                                                                                                                                                                                          |
|--------------------------------------------------------------------------------------------------------------------------------------------------------------------------------------------------------------------------------------------------------------------------------------------------------------------------------------------------------------|------------------------------------------------------------------------------------------------------------------------------------------------------------------------------------------------------------------------------------------------------------------------------------------------------------------------------------------------------------------------------------------------------------------------------------------------------------------------------------------------------------------------------------------------------------------------------------------------------------------------------------------------------------------------------------------------------------------------------------------------------------------------------------------------------------------------------------------------------------------------------------------------------------------------------------------------------------------------------------------------------------------------------------------------------------------------------------------------------------------------------------------------------------------------------------------------------------------------------------------------------------------------------------------------------------------------------------------------------------------------------------------------------------------------------------------------------------------------------------------|
| <p>respondent says 'yes' for.</p> <p>ଏମ୍ବୁମ୍ବେଟ୍‌ରଙ୍କ ପାଇଁ ନୋଟ: ସବୁ ପଦକ୍ଷେପ ବାଛନ୍ତୁ, ଯାହାପାଇଁ ଉତ୍ତରଦାତା 'ହଁ' କହିଛନ୍ତି ।</p>                                                                                                                                                                                                                                  | <p style="text-align: center;">ହାତ ଧୋଇବା / ସାନିଟାଇଜର ର ବ୍ୟବହାର ବଢ଼େଇ ଦେଇଛନ୍ତି</p> <p><input type="checkbox"/> 6. Wore a (face) mask<br/>ମାସ୍କ ପିନ୍ଧିଛନ୍ତି</p> <p><input type="checkbox"/> 7. Wore gloves (on your hands)<br/>ଗ୍ଲୋବ୍ ପିନ୍ଧିଛନ୍ତି</p> <p><input type="checkbox"/> 8. Tried to stop touching face<br/>ମୁହଁଟିକୁ ନ ଛୁଇଁବାର ଚେଷ୍ଟା କରିଛନ୍ତି</p> <p><input type="checkbox"/> 9. Did not shake hands with others<br/>ଅନ୍ୟ ମାନଙ୍କ ସହିତ ହାତ ମିଶେଇନାହାନ୍ତି</p> <p><input type="checkbox"/> 10. Covered your mouth with elbow when you sneezed or coughed<br/>ଛିଙ୍କିବା କିମ୍ବା କାଶିବା ସମୟରେ ପାଟିକୁ କହୁଣୀରେ ଘୋଡ଼ାଇ ଦେଇଛନ୍ତି</p> <p><input type="checkbox"/> 11. Drank local alcohol ଦେଶୀ ମଦ ପିଇଛନ୍ତି</p> <p><input type="checkbox"/> 12. Scrubbed/cleaned surfaces such as door handles, faucets, phone, etc.<br/>କୌଣସି ପୃଷ୍ଠକୁ ଘସିଛନ୍ତି/ସଫା କରିଛନ୍ତି ଯେପରିକି ଡୋର ହାଣ୍ଡଲ୍, ଟ୍ୟାପ, ଫୋନ୍ ଇତ୍ୟାଦି</p> <p><input type="checkbox"/> 13. Informed people of illness symptoms<br/>ଲୋକ ମାନଙ୍କୁ ରୋଗର ଲକ୍ଷଣ ବିଷୟରେ ଜଣେଇଛନ୍ତି</p> <p><input type="checkbox"/> 14. Contacted a coronavirus helpline<br/>କୌଣସି କରୋନାଭାଇରସ୍ ହେଲ୍ପଲାଇନ କୁ ଯୋଗାଯୋଗ କରିଛନ୍ତି</p> <p><input type="checkbox"/> 15. Avoided hospitals/clinics<br/>ହସ୍ପିଟାଲ କିମ୍ବା କ୍ଲିନିକ୍‌କୁ ଏଡେଇଛନ୍ତି</p> <p><input type="checkbox"/> 16. Avoided public transit/traveling<br/>ସର୍ବ ସାଧାରଣ ପରିବହନ/ଭ୍ରମଣକୁ ଏଡେଇଛନ୍ତି</p> <p><input type="checkbox"/> 17. Nothing କିଛି ନୁହେଁ</p> <p><input type="checkbox"/> 88. Other ଅନ୍ୟାନ୍ୟ: _____</p> |
| <p><b>B8.</b> What are some of the challenges you and your family face in being able to stay at home at all times except when you are performing essential activities such as working or buying food?</p> <p>ଖାଦ୍ୟ କିଣିବା କିମ୍ବା କାମ କରିବା ଭଳି ଆବଶ୍ୟକୀୟ କାମ ଗୁଡ଼ିକୁ ଛାଡି ଅନ୍ୟ ସମୟ ଘରେ ରହିବାରେ, ଆପଣ ଓ ଆପଣଙ୍କ ପରିବାର ସଦସ୍ୟ କେଉଁ ଅସୁବିଧାର ସମ୍ମୁଖୀନ ହୁଅନ୍ତି?</p> |                                                                                                                                                                                                                                                                                                                                                                                                                                                                                                                                                                                                                                                                                                                                                                                                                                                                                                                                                                                                                                                                                                                                                                                                                                                                                                                                                                                                                                                                                          |
| <p><b>B9.</b> What are some of the challenges you and your family face in being able to maintain 2 meters of distance between other non-family members when you are outside of your house?</p> <p>ଘରଠାରୁ ବାହାରେ ସମସ୍ତ ସମୟ ଅଣ-ପରିବାର ସଦସ୍ୟ ମାନଙ୍କ ଠାରୁ ୨ ମିଟର ଦୂରତ୍ବ ରକ୍ଷା କରିବା ସମୟରେ ଆପଣ ଓ ଆପଣଙ୍କ ପରିବାର ସଦସ୍ୟ କେଉଁ ଅସୁବିଧାର ସମ୍ମୁଖୀନ ହୁଅନ୍ତି?</p>          |                                                                                                                                                                                                                                                                                                                                                                                                                                                                                                                                                                                                                                                                                                                                                                                                                                                                                                                                                                                                                                                                                                                                                                                                                                                                                                                                                                                                                                                                                          |
| <p><b>B10.</b> What are some of the challenges you and your family face in being able to frequently wash your hands with water and soap?</p>                                                                                                                                                                                                                 |                                                                                                                                                                                                                                                                                                                                                                                                                                                                                                                                                                                                                                                                                                                                                                                                                                                                                                                                                                                                                                                                                                                                                                                                                                                                                                                                                                                                                                                                                          |

## COVID-19 Mobile Phone Interview – Head of Household

|                                                                                                                                                                                                                                                                                                                                                                                                                                                                                                                                                                  |                                                                                                                                                                                                                                                                                                                                                                                                                                                                                                                                                                                                                                                                                                                                                                                                     |
|------------------------------------------------------------------------------------------------------------------------------------------------------------------------------------------------------------------------------------------------------------------------------------------------------------------------------------------------------------------------------------------------------------------------------------------------------------------------------------------------------------------------------------------------------------------|-----------------------------------------------------------------------------------------------------------------------------------------------------------------------------------------------------------------------------------------------------------------------------------------------------------------------------------------------------------------------------------------------------------------------------------------------------------------------------------------------------------------------------------------------------------------------------------------------------------------------------------------------------------------------------------------------------------------------------------------------------------------------------------------------------|
| <p>ସାବୁନ ଓ ପାଣିରେ ବାରମ୍ବାର ହାତ ଧୋଇବାକୁ ନେଇ ଆପଣ ଓ ଆପଣଙ୍କ ପରିବାର ସଦସ୍ୟ କେଉଁ ଅସୁବିଧାର ସମ୍ମୁଖୀନ ହୁଅନ୍ତି?</p>                                                                                                                                                                                                                                                                                                                                                                                                                                                         |                                                                                                                                                                                                                                                                                                                                                                                                                                                                                                                                                                                                                                                                                                                                                                                                     |
| <p><b>B11.</b> What types of people are at high risk for getting very seriously sick if they get coronavirus?</p> <p>କେଉଁ ପ୍ରକାର ଲୋକଙ୍କୁ କରୋନାଭାଇରସ ହେଲେ ସେମାନେ ସର୍ବାଧିକ ଅସୁସ୍ଥ ହେବାର ବିପଦ ଅଛି?</p> <p>Enumerator note: Do <b>NOT</b> read response options. Select all that apply.<br/>ଏନୁମରେଟର ନୋଟ: ବିକଳ ଉତ୍ତର ଗୁଡ଼ିକୁ ପଢନ୍ତୁ ନାହିଁ. ଦେଇଥିବା ସମସ୍ତ ଉତ୍ତରକୁ ବାଛିନ୍ତୁ।</p>                                                                                                                                                                                       | <div style="display: flex; flex-direction: column; gap: 5px;"> <div><input type="checkbox"/> 1. Elderly/Over 60 ବୃଦ୍ଧ/60 ରୁ ଉର୍ଦ୍ଧ୍ୱ</div> <div><input type="checkbox"/> 2. Men ପୁରୁଷ</div> <div><input type="checkbox"/> 3. Women ମହିଳା</div> <div><input type="checkbox"/> 4. Babies (&lt;1 year) ଛୁଆ (&lt;୧ ବର୍ଷ)</div> <div><input type="checkbox"/> 5. Children ପିଲା</div> <div><input type="checkbox"/> 6. Pregnant women ଗର୍ଭବତୀ ମହିଳା</div> <div><input type="checkbox"/> 7. People who are already sick/weak immune systems<br/>ଯେଉଁ ଲୋକମାନେ ପୂର୍ବରୁ ଅସୁସ୍ଥ/ ଯାହାର ରୋଗପ୍ରତିରୋଧକ ପ୍ରଣାଳୀ ଦୁର୍ବଳ ଅଟେ</div> <div><input type="checkbox"/> 8. Everyone</div> <div><input type="checkbox"/> 88. Other ଅନ୍ୟାନ୍ୟ: _____</div> <div><input type="checkbox"/> 99. Don't know ଜଣା ନାହିଁ</div> </div> |
| <p><b>Enumerator read:</b> I am now going to read a few questions where I ask you to think about a scenario where you or a family member have coronavirus or show symptoms. I want to emphasize to you that this is just an imagined scenario and only for survey purposes.</p> <p>ମୁଁ ବର୍ତ୍ତମାନ କିଛି ପ୍ରଶ୍ନ ପଢିବାକୁ ଯାଉଛି ଯେବେ ମୁଁ ଆପଣଙ୍କୁ ଏକ ପରିସ୍ଥିତି ବିଷୟରେ ଭାବିବାକୁ କହିବି ଯେବେ ଆପଣଙ୍କୁ କିମ୍ବା ଆପଣଙ୍କ ପରିବାରର କେହି ସଦସ୍ୟଙ୍କୁ କରୋନାଭାଇରସ ହୋଇଛି କିମ୍ବା ଲକ୍ଷଣ ଦେଖା ଦେଉଛି। ମୁଁ ଏହା ଜୋର ଦେଇ କହୁଛି କି ଯେ ଏହା ଏକ କାଳ୍ପିତ ପରିସ୍ଥିତି ହିଁ ଏବଂ କେବଳ ସର୍ବେକାରଣ ପାଇଁ।</p> |                                                                                                                                                                                                                                                                                                                                                                                                                                                                                                                                                                                                                                                                                                                                                                                                     |
| <p><b>B12.</b> For survey purposes, if you don't mind, can I please ask how concerned would you be if you or someone in your household got coronavirus? Why?</p> <p>ସର୍ବେକାରଣ ପାଇଁ, ଯଦି ଆପଣ ଖରାପ ନ ଭାବନ୍ତି, କଣ ମୁଁ ପଚାରିପାରେ ଯେ, ଆପଣ କିମ୍ବା ଆପଣଙ୍କ ଘରେ କାହାକୁ କରୋନାଭାଇରସ ହେଲେ ଆପଣ କେତେ ଚିନ୍ତିତ ହେବେ?</p>                                                                                                                                                                                                                                                         | <div style="display: flex; flex-direction: column; gap: 5px;"> <div><input type="checkbox"/> 1. Not concerned ଚିନ୍ତିତ ନୁହେଁ</div> <div><input type="checkbox"/> 2. Somewhat concerned କିଛିମାତ୍ରାରେ ଚିନ୍ତିତ</div> <div><input type="checkbox"/> 3. Very concerned ବହୁତ ଚିନ୍ତିତ</div> <div><input type="checkbox"/> 99. Don't know ଜଣା ନାହିଁ</div> </div> <p><b>Explain why:</b> ବର୍ଣ୍ଣନା କରନ୍ତୁ କାହିଁକି</p>                                                                                                                                                                                                                                                                                                                                                                                          |
| <p><b>B13.</b> If you begin exhibiting symptoms, what actions will you take?</p> <p>ଯଦି ଆପଣଙ୍କ ମଧ୍ୟରେ ଲକ୍ଷଣ ଦେଖାଯିବା ଆରମ୍ଭ ହେଇଯାଏ, ଆପଣ କଣ କରିବେ?</p> <p>Enumerator Note: Do <b>NOT</b> read response options. Select all that apply.<br/>ଏନୁମରେଟରଙ୍କ ପାଇଁ ନୋଟ: ବିକଳ ଉତ୍ତର ଗୁଡ଼ିକୁ ପଢନ୍ତୁ ନାହିଁ. ଦେଇଥିବା ସମସ୍ତ ଉତ୍ତରକୁ ବାଛିନ୍ତୁ</p>                                                                                                                                                                                                                               | <div style="display: flex; flex-direction: column; gap: 5px;"> <div><input type="checkbox"/> 1. Stay at home more ଘରେ ଅଧିକ ରହିବେ</div> <div><input type="checkbox"/> 2. Stop attending school or work<br/>ସ୍କୁଲ କିମ୍ବା କାମକୁ ଯିବା ବନ୍ଦ କରିଦେବେ</div> <div><input type="checkbox"/> 3. Stop attending social gatherings (e.g., weddings, funerals, church, temple)<br/>ସାମାଜିକ ସମାବେଶକୁ ଯିବା ବନ୍ଦ କରିଦେବେ (ଉଦାହରଣ : ବିବାହ, ଅନ୍ତିମ ସଂସ୍କାର, ଗୀର୍ତ୍ତାଘର, ମନ୍ଦିର)</div> <div><input type="checkbox"/> 4. Keep a distance of at least 1 meter from others<br/>ଅନ୍ୟ ମାନଙ୍କ ଠାରୁ ଅତି କମରେ ୧ ମିଟର ଦୂରତ୍ୱ ରକ୍ଷା କରିବେ</div> <div><input type="checkbox"/> 5. Keep a distance of at least 2 meters from others</div> </div>                                                                                   |



## COVID-19 Mobile Phone Interview – Head of Household

|                                                                                                                                                                                                                                                                                                                                                                                                                                                                                                                                                                                                                                                                                                                                                                                                                                                                                                                                                                                                                            |                                                                                                                                                                                                                                                                                                                                                                                                                                                                                                                                                                                                                                                                                                                                                                                                      |                                               |                          |                          |
|----------------------------------------------------------------------------------------------------------------------------------------------------------------------------------------------------------------------------------------------------------------------------------------------------------------------------------------------------------------------------------------------------------------------------------------------------------------------------------------------------------------------------------------------------------------------------------------------------------------------------------------------------------------------------------------------------------------------------------------------------------------------------------------------------------------------------------------------------------------------------------------------------------------------------------------------------------------------------------------------------------------------------|------------------------------------------------------------------------------------------------------------------------------------------------------------------------------------------------------------------------------------------------------------------------------------------------------------------------------------------------------------------------------------------------------------------------------------------------------------------------------------------------------------------------------------------------------------------------------------------------------------------------------------------------------------------------------------------------------------------------------------------------------------------------------------------------------|-----------------------------------------------|--------------------------|--------------------------|
|                                                                                                                                                                                                                                                                                                                                                                                                                                                                                                                                                                                                                                                                                                                                                                                                                                                                                                                                                                                                                            | <p style="text-align: center;">ଅନ୍ୟ ମାନଙ୍କ ଠାରୁ ଅତି କମରେ ୨ ମିଟର ଦୂରତା ରକ୍ଷା କରିବେ</p> <p><input type="checkbox"/> 6. Wash hands more frequently ବାରମ୍ବାର ହାତ ଧୋଇବେ</p> <p><input type="checkbox"/> 7. Start wearing a mask ମାସ୍କ ପିନ୍ଧିବା ଆରମ୍ଭ କରିବେ</p> <p><input type="checkbox"/> 8. Go to health clinic ଚିକିତ୍ସାଳୟକୁ ଯିବେ</p> <p><input type="checkbox"/> 9. Go to be tested for coronavirus କରୋନାଭାଇରସର ପରୀକ୍ଷଣ ପାଇଁ ଯିବେ</p> <p><input type="checkbox"/> 10. Drink local alcohol ଦେଶୀ ମଦ ପିଇବେ</p> <p><input type="checkbox"/> 11. Inform people of illness symptoms ଲୋକ ମାନଙ୍କୁ ରୋଗର ଲକ୍ଷ୍ୟ ଶିକ୍ଷା ଦେଇ ଜଣାଇବେ</p> <p><input type="checkbox"/> 12. Nothing କିଛି ନୁହେଁ</p> <p><input type="checkbox"/> 88. Other ଅନ୍ୟାନ୍ୟ: _____</p> <p><input type="checkbox"/> 99. Don't know ଜାଣି ନାହିଁ</p> |                                               |                          |                          |
| <p><b>B14. What has been your main source for information about coronavirus?</b></p> <p>ଆପଣଙ୍କୁ କରୋନାଭାଇରସ ସହ ଜଡ଼ିତ ମିଳିଥିବା ସୂଚନାର ମୁଖ୍ୟ ଉତ୍ସ କଣ?</p> <p><u>Enumerator notes:</u><br/>For each source recorded, ask:<br/>How much do you trust this source - do you not trust any information from this source, trust some of the information, or trust all of the information?</p> <p>ଏନ୍ୟୁମେରେଟର ନୋଟ : ପ୍ରତିଟି ଉତ୍ସ ପାଇଁ, ପଚାରନ୍ତୁ<br/>ଆପଣ ଏହି ଉତ୍ସକୁ କେତେ ବିଶ୍ୱାସ କରନ୍ତି (ଏହି ଉତ୍ସର କୌଣସି ସୂଚନାକୁ ବିଶ୍ୱାସକରନ୍ତି ନାହିଁ, କିଛି ସୂଚନା ଉପରେ ବିଶ୍ୱାସକରନ୍ତି ନା ସବୁ ସୂଚନାକୁ ବିଶ୍ୱାସ କରନ୍ତି?)</p> <p>If the respondent is struggling to understand what “a source” is, you can read a few of the response options as examples.<br/>ଯଦି ଉତ୍ତରଦାତାଙ୍କୁ ‘ଉତ୍ସ’ ଶବ୍ଦଟିକୁ ବୁଝିବାରେ ଅସୁବିଧା ହେଉଛି, ଆପଣ କିଛି ବିକଳ୍ପ ଉଦାହରଣ ସ୍ୱରୂପ ପଢ଼ିପାରିବେ।</p> <p>If the respondent has more than one main source, you can record multiple sources.<br/>ଯଦି ଉତ୍ତରଦାତାଙ୍କ ପାଖରେ ଗୋଟିଏରୁ ଅଧିକ ମୁଖ୍ୟ ଉତ୍ସ ଅଛି, ଆପଣ ଏକାଧିକ ଉତ୍ସକୁ ରେକର୍ଡ କରିପାରିବେ।</p> | <p><b>Source</b><br/>ଉତ୍ସ</p>                                                                                                                                                                                                                                                                                                                                                                                                                                                                                                                                                                                                                                                                                                                                                                        | <p><b>Trust Level</b><br/>ବିଶ୍ୱାସର ମାତ୍ରା</p> |                          |                          |
|                                                                                                                                                                                                                                                                                                                                                                                                                                                                                                                                                                                                                                                                                                                                                                                                                                                                                                                                                                                                                            |                                                                                                                                                                                                                                                                                                                                                                                                                                                                                                                                                                                                                                                                                                                                                                                                      | Do not trust                                  | Trust some               | Trust all                |
|                                                                                                                                                                                                                                                                                                                                                                                                                                                                                                                                                                                                                                                                                                                                                                                                                                                                                                                                                                                                                            | <input type="checkbox"/> 1. No sources mentioned                                                                                                                                                                                                                                                                                                                                                                                                                                                                                                                                                                                                                                                                                                                                                     |                                               |                          |                          |
|                                                                                                                                                                                                                                                                                                                                                                                                                                                                                                                                                                                                                                                                                                                                                                                                                                                                                                                                                                                                                            | <input type="checkbox"/> 2. Government (National)                                                                                                                                                                                                                                                                                                                                                                                                                                                                                                                                                                                                                                                                                                                                                    | <input type="checkbox"/>                      | <input type="checkbox"/> | <input type="checkbox"/> |
|                                                                                                                                                                                                                                                                                                                                                                                                                                                                                                                                                                                                                                                                                                                                                                                                                                                                                                                                                                                                                            | <input type="checkbox"/> 3. Government (State/Local)                                                                                                                                                                                                                                                                                                                                                                                                                                                                                                                                                                                                                                                                                                                                                 | <input type="checkbox"/>                      | <input type="checkbox"/> | <input type="checkbox"/> |
|                                                                                                                                                                                                                                                                                                                                                                                                                                                                                                                                                                                                                                                                                                                                                                                                                                                                                                                                                                                                                            | <input type="checkbox"/> 4. Village Leader                                                                                                                                                                                                                                                                                                                                                                                                                                                                                                                                                                                                                                                                                                                                                           | <input type="checkbox"/>                      | <input type="checkbox"/> | <input type="checkbox"/> |
|                                                                                                                                                                                                                                                                                                                                                                                                                                                                                                                                                                                                                                                                                                                                                                                                                                                                                                                                                                                                                            | <input type="checkbox"/> 5. NGO                                                                                                                                                                                                                                                                                                                                                                                                                                                                                                                                                                                                                                                                                                                                                                      | <input type="checkbox"/>                      | <input type="checkbox"/> | <input type="checkbox"/> |
|                                                                                                                                                                                                                                                                                                                                                                                                                                                                                                                                                                                                                                                                                                                                                                                                                                                                                                                                                                                                                            | <input type="checkbox"/> 6. Anganwadi                                                                                                                                                                                                                                                                                                                                                                                                                                                                                                                                                                                                                                                                                                                                                                | <input type="checkbox"/>                      | <input type="checkbox"/> | <input type="checkbox"/> |
|                                                                                                                                                                                                                                                                                                                                                                                                                                                                                                                                                                                                                                                                                                                                                                                                                                                                                                                                                                                                                            | <input type="checkbox"/> 7. ASHA Worker                                                                                                                                                                                                                                                                                                                                                                                                                                                                                                                                                                                                                                                                                                                                                              | <input type="checkbox"/>                      | <input type="checkbox"/> | <input type="checkbox"/> |
|                                                                                                                                                                                                                                                                                                                                                                                                                                                                                                                                                                                                                                                                                                                                                                                                                                                                                                                                                                                                                            | <input type="checkbox"/> 8. Other health worker                                                                                                                                                                                                                                                                                                                                                                                                                                                                                                                                                                                                                                                                                                                                                      | <input type="checkbox"/>                      | <input type="checkbox"/> | <input type="checkbox"/> |
|                                                                                                                                                                                                                                                                                                                                                                                                                                                                                                                                                                                                                                                                                                                                                                                                                                                                                                                                                                                                                            | <input type="checkbox"/> 9. Neighbor in your village                                                                                                                                                                                                                                                                                                                                                                                                                                                                                                                                                                                                                                                                                                                                                 | <input type="checkbox"/>                      | <input type="checkbox"/> | <input type="checkbox"/> |
|                                                                                                                                                                                                                                                                                                                                                                                                                                                                                                                                                                                                                                                                                                                                                                                                                                                                                                                                                                                                                            | <input type="checkbox"/> 10. Friend                                                                                                                                                                                                                                                                                                                                                                                                                                                                                                                                                                                                                                                                                                                                                                  | <input type="checkbox"/>                      | <input type="checkbox"/> | <input type="checkbox"/> |
|                                                                                                                                                                                                                                                                                                                                                                                                                                                                                                                                                                                                                                                                                                                                                                                                                                                                                                                                                                                                                            | <input type="checkbox"/> 11. Family                                                                                                                                                                                                                                                                                                                                                                                                                                                                                                                                                                                                                                                                                                                                                                  | <input type="checkbox"/>                      | <input type="checkbox"/> | <input type="checkbox"/> |
|                                                                                                                                                                                                                                                                                                                                                                                                                                                                                                                                                                                                                                                                                                                                                                                                                                                                                                                                                                                                                            | <input type="checkbox"/> 12. Social media/internet                                                                                                                                                                                                                                                                                                                                                                                                                                                                                                                                                                                                                                                                                                                                                   | <input type="checkbox"/>                      | <input type="checkbox"/> | <input type="checkbox"/> |
|                                                                                                                                                                                                                                                                                                                                                                                                                                                                                                                                                                                                                                                                                                                                                                                                                                                                                                                                                                                                                            | <input type="checkbox"/> 13. News                                                                                                                                                                                                                                                                                                                                                                                                                                                                                                                                                                                                                                                                                                                                                                    | <input type="checkbox"/>                      | <input type="checkbox"/> | <input type="checkbox"/> |
|                                                                                                                                                                                                                                                                                                                                                                                                                                                                                                                                                                                                                                                                                                                                                                                                                                                                                                                                                                                                                            | <input type="checkbox"/> 14. Other:                                                                                                                                                                                                                                                                                                                                                                                                                                                                                                                                                                                                                                                                                                                                                                  | <input type="checkbox"/>                      | <input type="checkbox"/> | <input type="checkbox"/> |
| <p><b>B15. How have you gotten your information from this main source?</b></p> <p>ଆପଣଙ୍କୁ ନିଜ ମୁଖ୍ୟ ଉତ୍ସରୁ ସୂଚନା କେଉଁଠାରୁ ମିଳିଲା?</p>                                                                                                                                                                                                                                                                                                                                                                                                                                                                                                                                                                                                                                                                                                                                                                                                                                                                                      | <p><input type="checkbox"/> 1. TV ଟିଭି</p> <p><input type="checkbox"/> 2. Radio ରେଡ଼ିଓ</p> <p><input type="checkbox"/> 3. Loudspeaker from vehicle ଗାଡ଼ିରେ ଲାଗିଥିବା ଶ୍ରେକର</p> <p><input type="checkbox"/> 4. Newspaper ଖବରକାଗଜ</p> <p><input type="checkbox"/> 5. Phone call/SMS ଫୋନ କଲ/ଏସଏମଏସ</p>                                                                                                                                                                                                                                                                                                                                                                                                                                                                                                  |                                               |                          |                          |

## COVID-19 Mobile Phone Interview – Head of Household

|                                                                                                                                                                                                                                                                                                                                                                                                                                                                                                                                                                                                                                                                                                                                                                                   |                                                                                                                                                                                                                                                                                                                                                                                                                                                                                                                                                                                                                                                                                                                                                                                                                                                        |
|-----------------------------------------------------------------------------------------------------------------------------------------------------------------------------------------------------------------------------------------------------------------------------------------------------------------------------------------------------------------------------------------------------------------------------------------------------------------------------------------------------------------------------------------------------------------------------------------------------------------------------------------------------------------------------------------------------------------------------------------------------------------------------------|--------------------------------------------------------------------------------------------------------------------------------------------------------------------------------------------------------------------------------------------------------------------------------------------------------------------------------------------------------------------------------------------------------------------------------------------------------------------------------------------------------------------------------------------------------------------------------------------------------------------------------------------------------------------------------------------------------------------------------------------------------------------------------------------------------------------------------------------------------|
|                                                                                                                                                                                                                                                                                                                                                                                                                                                                                                                                                                                                                                                                                                                                                                                   | <input type="checkbox"/> 6. In person conversation ବ୍ୟକ୍ତିଗତ କଥାବାର୍ତ୍ତା<br><input type="checkbox"/> 7. Internet or phone app ଇଣ୍ଟରନେଟ କିମ୍ବା ଫୋନ୍ ଆପ<br><input type="checkbox"/> 88. Other ଅନ୍ୟାନ୍ୟ _____<br><input type="checkbox"/> 99. Don't know ଜାଣିନାହିଁ                                                                                                                                                                                                                                                                                                                                                                                                                                                                                                                                                                                        |
| <p><b>B16.</b> From what other sources have you received information about coronavirus?<br/>         I am going to read a list of sources. For each one, please tell me yes or no.</p> <p>Enumerator note: Read each response option.</p> <p>କରୋନାଭାଇରସ ସହ ଜଡ଼ିତ ସୂଚନା ଆପଣଙ୍କୁ ଅନ୍ୟ କେଉଁ ଉତ୍ସରୁ ମିଳିଛି? ମୁଁ କିଛି ଉତ୍ସର ସୂଚୀ ପଢ଼ିଛି। ପ୍ରତିଟି ପାଇଁ, ଦୟାକରି ହଁ କିମ୍ବା ନାହିଁ କୁହନ୍ତୁ।</p>                                                                                                                                                                                                                                                                                                                                                                                             | <input type="checkbox"/> 1. Government (National) କେନ୍ଦ୍ର ସରକାର<br><input type="checkbox"/> 2. Government (State/Local) ରାଜ୍ୟ/ସ୍ଥାନୀୟ ସରକାର<br><input type="checkbox"/> 3. Village Leader ଗ୍ରାମର ନେତା<br><input type="checkbox"/> 4. NGO ସ୍ୱେଚ୍ଛାସେବୀ ସଂଗଠନ<br><input type="checkbox"/> 5. Anganwadi ଅଙ୍ଗନବାଡ଼ି<br><input type="checkbox"/> 6. ASHA Worker ଆଶା କର୍ମୀ<br><input type="checkbox"/> 7. Other health worker ଅନ୍ୟ ସ୍ୱାସ୍ଥ୍ୟ କର୍ମଚାରୀ<br><input type="checkbox"/> 8 Neighbor in your village ଆପଣଙ୍କ ଗାଁ ର ପଡୋଶୀ<br><input type="checkbox"/> 9. Friend ସାଙ୍ଗ<br><input type="checkbox"/> 10. Family ପରିବାର<br><input type="checkbox"/> 11. Social media/internet ସାମାଜିକ ଗଣମାଧ୍ୟମ/ଇଣ୍ଟରନେଟ<br><input type="checkbox"/> 12. News ନ୍ୟୁଜ<br><input type="checkbox"/> 13. No other sources କିଛି ଉତ୍ସ ନାହିଁ<br><input type="checkbox"/> 14. Other: |
| <p><b>SECTION C: COVID-19 Impact on Daily Life and Practices</b></p> <p><b>Enumerator read:</b> Thank you for your responses so far. Now I'm going to ask you some questions about how coronavirus has impacted your daily life.</p> <p>ଏନ୍ୟୁମରେଟର ପଢନ୍ତୁ: ବର୍ତ୍ତମାନ ପର୍ଯ୍ୟନ୍ତ ଦେଇଥିବା ଆପଣଙ୍କ ଉତ୍ତର ପାଇଁ ଧନ୍ୟବାଦ। ମୁଁ ବର୍ତ୍ତମାନ କିଛି ପ୍ରଶ୍ନ କରୋନାଭାଇରସ ଆପଣଙ୍କ ଜୀବନକୁ କିପରି ପ୍ରଭାବିତ କରିଛି, ସେ ବିଷୟରେ ପଚାରିବି</p>                                                                                                                                                                                                                                                                                                                                                                  |                                                                                                                                                                                                                                                                                                                                                                                                                                                                                                                                                                                                                                                                                                                                                                                                                                                        |
| <p><b>C1.</b> How has coronavirus or the lockdown changed your daily life? Think about from the time you get up in the morning to the time you go to sleep at night. How is your day different now, if it is different?</p> <p>କରୋନାଭାଇରସ କିମ୍ବା ଲକ୍ଡାଉନ ଆପଣଙ୍କ ଦୈନିକ ଜୀବନକୁ କିପରି ବଦଳାଇ ଦେଇଛି? ସକାଳୁ ଉଠିବା ସମୟରୁ ଆରମ୍ଭ କରି ରାତିରେ ଶୋଇବାକୁ ଯିବା ପର୍ଯ୍ୟନ୍ତ ସମୟ ବିଷୟରେ ଭାବନ୍ତୁ। ବର୍ତ୍ତମାନ ଆପଣଙ୍କ ଦିନ ଅଲଗା କିପରି, ଯଦି ଅଲଗା ହୋଇଥାଏ?</p> <p><b>Probes:</b> ଅନୁସନ୍ଧାନ:</p> <ul style="list-style-type: none"> <li>○ Staying at home more? ଘରେ ଅଧିକ ସମୟ ରହୁଛନ୍ତି?</li> <li>○ More/less workload? ଅଧିକ/କମ କାମ</li> <li>○ More/less free time? ଅଧିକ/କମ ଖାଲି ସମୟ</li> <li>○ Is there anywhere in the village you <i>used</i> to go but no longer go? ଗାଁରେ ଏପରି କିଛି ଜାଗା ଅଛି କି</li> </ul> |                                                                                                                                                                                                                                                                                                                                                                                                                                                                                                                                                                                                                                                                                                                                                                                                                                                        |

## COVID-19 Mobile Phone Interview – Head of Household

|                                                                                                                                                                                                                                                                                                                                                                                       |                                                                                                                                                                                                                                                                                                                                                                                                                                                                                                                                                                                                                                                                                                                                                                                                                                                                                                                                                                                                                                                                                                                                                                                                                                                                                                                                                                                                                                                                                                                                                                                                                                                                                                                                                                           |
|---------------------------------------------------------------------------------------------------------------------------------------------------------------------------------------------------------------------------------------------------------------------------------------------------------------------------------------------------------------------------------------|---------------------------------------------------------------------------------------------------------------------------------------------------------------------------------------------------------------------------------------------------------------------------------------------------------------------------------------------------------------------------------------------------------------------------------------------------------------------------------------------------------------------------------------------------------------------------------------------------------------------------------------------------------------------------------------------------------------------------------------------------------------------------------------------------------------------------------------------------------------------------------------------------------------------------------------------------------------------------------------------------------------------------------------------------------------------------------------------------------------------------------------------------------------------------------------------------------------------------------------------------------------------------------------------------------------------------------------------------------------------------------------------------------------------------------------------------------------------------------------------------------------------------------------------------------------------------------------------------------------------------------------------------------------------------------------------------------------------------------------------------------------------------|
| <p>ଯେଉଁଠି ଆପଣ ଯାଉଥିଲେ କିନ୍ତୁ ଆଉ ଯାଉ ନାହାନ୍ତି?</p>                                                                                                                                                                                                                                                                                                                                     |                                                                                                                                                                                                                                                                                                                                                                                                                                                                                                                                                                                                                                                                                                                                                                                                                                                                                                                                                                                                                                                                                                                                                                                                                                                                                                                                                                                                                                                                                                                                                                                                                                                                                                                                                                           |
| <p><b>C2.</b> Has coronavirus or the lockdown changed how you or your family <b>interact with other members of your village</b>? Please explain.</p> <p>କଣ କରୋନାଭାଇରସ କିମ୍ବା ଲକଡାଉନ ଆପଣଙ୍କର କିମ୍ବା ଆପଣଙ୍କ ପରିବାରର ଗ୍ରାମର ଅନ୍ୟ ଲୋକମାନଙ୍କ ସହିତ ମିଳାମିଶାରେ କିଛି ପରିବର୍ତ୍ତନ ଆଣିଛି? ଦୟାକରି ବର୍ଣ୍ଣନା କରନ୍ତୁ।</p>                                                                            | <p><input type="checkbox"/> 1. Yes ହଁ</p> <p><input type="checkbox"/> 2. No ନାହିଁ</p> <p><b><u>Please explain. ଦୟାକରି ବର୍ଣ୍ଣନା କରନ୍ତୁ।</u></b></p>                                                                                                                                                                                                                                                                                                                                                                                                                                                                                                                                                                                                                                                                                                                                                                                                                                                                                                                                                                                                                                                                                                                                                                                                                                                                                                                                                                                                                                                                                                                                                                                                                        |
| <p><b>C3.</b> In the past 7 days, did you take any of the following actions to cover your household's basic needs?</p> <p>ଗତ ସାତଦିନ ମଧ୍ୟରେ, ନିଜ ଘରର ସାଧାରଣ ଆବଶ୍ୟକତାକୁ ପୂରଣ କରିବା ପାଇଁ, ଆପଣ ଉକ୍ତ କେଉଁ କେଉଁ ପଦକ୍ଷେପ ନେଇଛନ୍ତି?</p> <p>Enumerator: read all response options.<br/>ଏନୁମରେଟର ନୋଟ : ସମସ୍ତ ବିକଳ୍ପ ଉତ୍ତରଗୁଡ଼ିକୁ ପଢନ୍ତୁ</p> <p>Record any explanations the respondent gives</p> | <p><input type="checkbox"/> 1. Use cash savings or bank savings<br/>ସଞ୍ଚିତ ଟଙ୍କା କିମ୍ବା ବ୍ୟାଙ୍କ ଜମାଦାଖି ଖର୍ଚ୍ଚ କରିଛନ୍ତି</p> <p><input type="checkbox"/> 2. Borrow money or food from neighbor, friend, or relative ପଡୋଶୀ, ସାଙ୍ଗ କିମ୍ବା ସମ୍ପର୍କୀୟଙ୍କ ଠାରୁ ଟଙ୍କା କିମ୍ବା ଖାଦ୍ୟ ଉଧାର ଆଣିଛନ୍ତି</p> <p><input type="checkbox"/> 3. Sell assets ସମ୍ପତ୍ତି ବିକିଛନ୍ତି</p> <p><input type="checkbox"/> 4. Rely on Government assistance → <b>Ask follow-up question C3A</b><br/>ସରକାରୀ ସାହାଯ୍ୟ ଉପରେ ନିର୍ଭର କରିଛନ୍ତି</p> <p><input type="checkbox"/> 5. Rely on NGO assistance<br/>ଏନଜିଓର ସାହାଯ୍ୟ ଉପରେ ନିର୍ଭର କରିଛନ୍ତି</p> <p><input type="checkbox"/> 6. None of the above ଏଥିମଧ୍ୟରୁ କିଛି ନୁହେଁ</p> <p><input type="checkbox"/> 7. Other ଅନ୍ୟାନ୍ୟ _____</p> <p><b><u>Record any explanations the respondent gives for this question: ଉତ୍ତରଦାତା ଦେଇଥିବା ଯେକୌଣସି ବର୍ଣ୍ଣନା କୁ ଟିପନ୍ତୁ :</u></b></p> <p><b><u>If rely on government assistance is yes, ask:</u></b><br/><b><u>ଯଦି ସରକାରୀ ସାହାଯ୍ୟ ଉପରେ ନିର୍ଭର କରୁଛନ୍ତି, ତାହେଲେ ପଚାରନ୍ତୁ :</u></b></p> <p><b>C3A.</b> Which, if any, of the following government schemes have you received benefits from?<br/>ଆପଣ ଉକ୍ତ କେଉଁ ସରକାରୀ ନୀତିରୁ ଲାଭବାନ ହେଇଛନ୍ତି?</p> <p>Enumerator: read all response options.<br/>ଏନୁମରେଟର ଏନୁମରେଟର: ସମସ୍ତ ବିକଳ୍ପ ଉତ୍ତରଗୁଡ଼ିକୁ ପଢନ୍ତୁ</p> <p><input type="checkbox"/> 1. National Social Assistance Programme for widows, senior citizens, differently abled<br/>ଭାରତ ସରକାରଙ୍କର ବିଧବା, ବୃଦ୍ଧ ଓ ବିକଳାଙ୍ଗ ସାମାଜିକ ଭରା କାର୍ଯ୍ୟକ୍ରମ</p> <p><input type="checkbox"/> 2. Free ration for BPL cardholders over three months<br/>ବିପିଏଲ କାର୍ଡଧାରୀଙ୍କ ପାଇଁ 3 ମାସର ମାଗଣା ରାସନ</p> <p><input type="checkbox"/> 3. Jan Dhan account deposited with INR 500 for three months<br/>ଜନଧନ ଖାତାରେ ଟିନି ମାସ ପାଇଁ 500 ଟଙ୍କା ଜମା</p> |

## COVID-19 Mobile Phone Interview – Head of Household

|                                                                                                                                                                                                                                                                                                                                                                                                                                                                                               |                                                                                                                                                                                                                                                                                                                                                                                                                          |
|-----------------------------------------------------------------------------------------------------------------------------------------------------------------------------------------------------------------------------------------------------------------------------------------------------------------------------------------------------------------------------------------------------------------------------------------------------------------------------------------------|--------------------------------------------------------------------------------------------------------------------------------------------------------------------------------------------------------------------------------------------------------------------------------------------------------------------------------------------------------------------------------------------------------------------------|
|                                                                                                                                                                                                                                                                                                                                                                                                                                                                                               | <input type="checkbox"/> 4. Farmer accounts deposited with INR 2000<br>କୃଷକ ମାନଙ୍କ ବ୍ୟାଙ୍କ ଖାତାରେ 2000 ଟଙ୍କା ଜମା<br><input type="checkbox"/> 5. Employment guarantee under National Rural Employment Guarantee Scheme<br>ଜାତୀୟ ଗ୍ରାମୀଣ କର୍ମନିଯୁକ୍ତି ଯୋଜନା (ନରେଗା) ବ୍ଲାକ ନିଶ୍ଚିତ ନିଯୁକ୍ତି<br><input type="checkbox"/> 6. None କିଛି ନୁହେଁ                                                                                  |
| <b>C4.</b> Have you or any member of your family lost a job or work due to coronavirus or the lockdown?<br>କରୋନାଭାଇରସ ପାଇଁ, କଣ ଆପଣ କିମ୍ବା ଆପଣଙ୍କ ପରିବାରର କେହି ସଦସ୍ୟ ନିଜ ଚାକିରି କିମ୍ବା କାମ ହରେଇଛନ୍ତି କି?<br><br>If yes, who has lost their job and what was the occupation for the job that was lost?<br>ଯଦି ହଁ, କିଏ ନିଜ ଚାକିରି ହରେଇଛନ୍ତି ଓ ତାଙ୍କର ବୃତ୍ତି କଣ ଥିଲା?                                                                                                                             | <input type="checkbox"/> 1. Yes ହଁ<br><input type="checkbox"/> 2. No ନାହିଁ<br><br><b><u>If yes, record relationship and occupation:</u></b><br>ଯଦି ହଁ, ସମ୍ପର୍କ ଓ ବୃତ୍ତି ନୋଟ କରନ୍ତୁ:                                                                                                                                                                                                                                      |
| <b>C5.</b> In the past 7 days, have you experienced any difficulties in getting the material you use to cook with (such as wood, gas, etc.) as a result of coronavirus or the lockdown?<br><br>ଗତ ସାତ ଦିନ ମଧ୍ୟରେ, କରୋନା ଭାଇରସ ପାଇଁ, ଆପଣଙ୍କୁ ରାନ୍ଧିବାରେ ଆବଶ୍ୟକ ହେଉଥିବା କିଛି ସାମଗ୍ରୀ (ଯେପରିକି କାଠ, ଗ୍ୟାସ ଇତ୍ୟାଦି) ମିଳିବାରେ କିଛି ଅସୁବିଧା ହୋଇଛି କି?<br><br>If yes, what type of material and please describe difficulty. ଯଦି ହଁ, କେଉଁ କି ପ୍ରକାର ବସ୍ତୁ ଓ ଦୟାକରି ବର୍ଣ୍ଣନା କରନ୍ତୁ କି ଅସୁବିଧା ହୋଇଛି ? | <input type="checkbox"/> 1. Yes ହଁ<br><input type="checkbox"/> 2. No ନାହିଁ<br><br><b><u>If yes, what type of material and please describe difficulty:</u></b><br>ଯଦି ହଁ, ଏହା କି ପ୍ରକାର ବସ୍ତୁ ଓ ଦୟାକରି ବର୍ଣ୍ଣନା କରନ୍ତୁ କି ଅସୁବିଧା ହୋଇଛି ?                                                                                                                                                                                 |
| <b>C6.</b> Has coronavirus or the lockdown changed the <b>types or quantity of food</b> your family eats daily? If yes, describe how this has changed.<br><br>କଣ କରୋନାଭାଇରସ କିମ୍ବା ଲକଡାଉନ ଆପଣଙ୍କ ପରିବାରର ର ଖାଇବାର ପରିମାଣ କିମ୍ବା ପ୍ରକାରରେ କିଛି ପରିବର୍ତ୍ତନ ଆଣିଛି? ଯଦି ହଁ, ବର୍ଣ୍ଣନା କରନ୍ତୁ କି ଏହା କି ପରିବର୍ତ୍ତନ ଆଣିଛି।                                                                                                                                                                           | Change in <b>types of food</b> ? ଖାଦ୍ୟର ପ୍ରକାରରେ ପରିବର୍ତ୍ତନ<br><input type="checkbox"/> 1. Yes ହଁ<br><input type="checkbox"/> 2. No ନାହିଁ<br><br>Change in <b>quantity of food</b> ? ଖାଦ୍ୟର ପରିମାଣରେ ପରିବର୍ତ୍ତନ<br><input type="checkbox"/> 1. Yes ହଁ – Increase<br><input type="checkbox"/> 2. Yes ହଁ - Decrease<br><input type="checkbox"/> 3. No ନାହିଁ<br><br><b><u>If yes, describe:</u></b> ଯଦି ହଁ, ବର୍ଣ୍ଣନା କରନ୍ତୁ |
| <b>C7.</b> Are the number of people currently staying in your house more, less, or the same as the number of people that were staying in your house before coronavirus and the lockdown                                                                                                                                                                                                                                                                                                       | <input type="checkbox"/> 1. Less କମ<br><input type="checkbox"/> 2. The same ସମାନ                                                                                                                                                                                                                                                                                                                                         |

## COVID-19 Mobile Phone Interview – Head of Household

|                                                                                                                                                                                                                                                                                                                                                                                                                                                                                                                                                                                        |                                                                                                                                                                                                                                                                                                                                                   |
|----------------------------------------------------------------------------------------------------------------------------------------------------------------------------------------------------------------------------------------------------------------------------------------------------------------------------------------------------------------------------------------------------------------------------------------------------------------------------------------------------------------------------------------------------------------------------------------|---------------------------------------------------------------------------------------------------------------------------------------------------------------------------------------------------------------------------------------------------------------------------------------------------------------------------------------------------|
| <p>started?</p> <p>ଆପଣଙ୍କ ଘରେ ବର୍ତ୍ତମାନ ରହୁଥିବା ଲୋକଙ୍କ ସଂଖ୍ୟା କରୋନାଭାଇରସ ଏବଂ ଲକଡାଉନ ଆରମ୍ଭ ହେବ ପୂର୍ବରୁ ଘରେ ରହୁଥିବା ଲୋକଙ୍କ ସଂଖ୍ୟା ଠାରୁ ଅଧିକ, କମ ନା ସମାନ?</p>                                                                                                                                                                                                                                                                                                                                                                                                                             | <p><input type="checkbox"/> 3. More ଅଧିକ</p>                                                                                                                                                                                                                                                                                                      |
| <p><b>C8.</b> The last time you defecated, did you defecate in the open or use the latrine?</p> <p>କଣ ଶେଷ ଥର ଯେବେ ଆପଣ ଝାଡ଼ା ଯାଇଥିଲେ ,ତେବେ ଆପଣ ଖୋଲା ରେ ଝାଡ଼ା ଯାଇଥିଲେ ନା ପାଇଖାନା ବ୍ୟବହାର କରିଥିଲେ?</p>                                                                                                                                                                                                                                                                                                                                                                                    | <p><input type="checkbox"/> 1. Open ଖୋଲା ରେ</p> <p><input type="checkbox"/> 2. Latrine ପାଇଖାନା ରେ</p> <p><input type="checkbox"/> 3. Somewhere else (not open field or latrine) ଅଲଗା କେଉଁଠି (ଖୋଲା ପଡ଼ିଆ ନୁହେଁ କିମ୍ବା ପାଇଖାନା ନୁହେଁ)</p> <p><input type="checkbox"/> 99. Don't know ଜାଣିନାହିଁ</p>                                                  |
| <p><b>C9.</b> Has coronavirus or the lockdown changed the <b>defecation location of you or any family members?</b> Please explain.</p> <p>କଣ କରୋନାଭାଇରସ କିମ୍ବା ଲକଡାଉନ ଆପଣ କିମ୍ବା ଆପଣଙ୍କ କେହି ପରିବାର ସଦସ୍ୟଙ୍କ ଝାଡ଼ା ଯିବା ଜାଗାକୁ ବଦଳେଇଛି କି? ଦୟାକରି ବର୍ଣ୍ଣନା କରନ୍ତୁ</p> <p><b>Probe:</b> Have there been any changes for <b>elderly adults</b> in your household?<br/>Have there been any changes for <b>young children</b> in your household?</p> <p>ଆପଣଙ୍କ ଘରର ବୃଦ୍ଧ ବ୍ୟକ୍ତିଙ୍କ କ୍ଷେତ୍ରରେ କିଛି ପରିବର୍ତ୍ତନ ଆସିଛି କି?<br/>ଆପଣଙ୍କ ଘରର ଛୋଟ ପିଲାଙ୍କ କ୍ଷେତ୍ରରେ କିଛି ପରିବର୍ତ୍ତନ ଆସିଛି କି?</p> | <p><input type="checkbox"/> 1. Yes ହଁ</p> <p><input type="checkbox"/> 2. No ନାହିଁ</p> <p><b><u>Please explain. ବର୍ଣ୍ଣନା କରନ୍ତୁ</u></b></p>                                                                                                                                                                                                        |
| <p><b>C10.</b> Due to coronavirus or the lockdown, do you think people in this village are defecating in the open more, defecating in a latrine more, or there has been no change in where people defecate? Explain why.</p> <p>ଆପଣ ଭାବୁଛନ୍ତି କି ଯେ, କରୋନାଭାଇରସ କିମ୍ବା ଲକଡାଉନ ପାଇଁ ଆପଣଙ୍କ ଗ୍ରାମର ଲୋକମାନେ, ଖୋଲାରେ ଅଧିକ ଝାଡ଼ା ଯାଉଛନ୍ତି, ଲାଟ୍ରିନରେ ଅଧିକ ଝାଡ଼ା ଯାଉଛନ୍ତି ନା ଲୋକ ଝାଡ଼ା କରୁଥିବା ଜାଗାରେ କୌଣସି ପରିବର୍ତ୍ତନ ଆସିନାହିଁ? ବର୍ଣ୍ଣନା କରନ୍ତୁ କଣ ପାଇଁ।</p>                                                                                                                                | <p><input type="checkbox"/> 1. More open defecation ଖୋଲାରେ ଝାଡ଼ା ଯିବା ବଢ଼ିଛି</p> <p><input type="checkbox"/> 2. More latrine use ଲାଟ୍ରିନ ବ୍ୟବହାର ବଢ଼ିଛି</p> <p><input type="checkbox"/> 3. No change କିଛି ପରିବର୍ତ୍ତନ ନୁହେଁ</p> <p><input type="checkbox"/> 99. Don't know ଜାଣିନାହିଁ</p> <p><b><u>Explain why: ବର୍ଣ୍ଣନା କରନ୍ତୁ କାହିଁକି</u></b></p> |
| <p><b>C11.</b> Has coronavirus or the lockdown changed your <b>handwashing practices?</b> Please explain.</p> <p>କଣ କରୋନାଭାଇରସ କିମ୍ବା ଲକଡାଉନ ଆପଣଙ୍କ ହାତଧୁଆ ପ୍ରକ୍ରିୟାକୁ ବଦଳେଇଛି? ଦୟାକରି ବର୍ଣ୍ଣନା କରନ୍ତୁ।</p> <p><b>Probes:</b> Has there been any change in <b>how often</b> you wash your hands?</p>                                                                                                                                                                                                                                                                                   | <p><input type="checkbox"/> 1. Yes ହଁ</p> <p><input type="checkbox"/> 2. No ନାହିଁ</p> <p><b><u>Please explain. ଦୟାକରି ବର୍ଣ୍ଣନା କରନ୍ତୁ</u></b></p>                                                                                                                                                                                                 |

## COVID-19 Mobile Phone Interview – Head of Household

|                                                                                                                                                                                                                                                                                                                                                                                                                           |                                                                                                                                                                                                                                                                                                                                                                                                                                                                                                                                                                                                                                                                                                             |
|---------------------------------------------------------------------------------------------------------------------------------------------------------------------------------------------------------------------------------------------------------------------------------------------------------------------------------------------------------------------------------------------------------------------------|-------------------------------------------------------------------------------------------------------------------------------------------------------------------------------------------------------------------------------------------------------------------------------------------------------------------------------------------------------------------------------------------------------------------------------------------------------------------------------------------------------------------------------------------------------------------------------------------------------------------------------------------------------------------------------------------------------------|
| <p>କଣ ଆପଣ ପ୍ରାୟତଃ କେତେଥର ହାତ ଧୁଅନ୍ତି, ସେଥିରେ କିଛି ପରିବର୍ତ୍ତନ ଆସିଛି କି ?</p> <p><b>Has there been any change in <b>how much soap or water you use</b> to wash your hands?</b></p> <p>କଣ ଆପଣ ପ୍ରାୟତଃ କେତେ ପରିମାଣର ସାବୁନ କିମ୍ବା ପାଣି ବ୍ୟବହାର କରନ୍ତି, ସେଥିରେ କିଛି ପରିବର୍ତ୍ତନ ଆସିଛି କି ?</p>                                                                                                                                   |                                                                                                                                                                                                                                                                                                                                                                                                                                                                                                                                                                                                                                                                                                             |
| <p><b>C12.</b> In the past 7 days, have you had any difficulties with getting the water that you need for your household? Please explain.</p> <p>କରୋନାଭାଇରସ କିମ୍ବା ଲକଡାଉନ ପାଇଁ ଗତ ସାତ ଦିନ ମଧ୍ୟରେ, କଣ ଆପଣଙ୍କୁ ନିଜ ଘରର ଆବଶ୍ୟକତା ପାଇଁ ଦରକାର ହେଉଥିବା ପାଣି ମିଳିବାରେ କିଛି ଅସୁବିଧା ହେଇଛି କି ?</p>                                                                                                                                | <p><input type="checkbox"/> 1. Yes ହଁ</p> <p><input type="checkbox"/> 2. No ନାହିଁ</p> <p><b><u>Please explain. ଦୟାକରି ବର୍ଣ୍ଣନା କରନ୍ତୁ</u></b></p>                                                                                                                                                                                                                                                                                                                                                                                                                                                                                                                                                           |
| <p><b>C13.</b> Has coronavirus or the lockdown changed your <b>drinking water practices</b> such as where you get your water, how you store it, and whether or not you clean/treat the water? Please explain.</p> <p>କଣ କରୋନାଭାଇରସ କିମ୍ବା ଲକଡାଉନ ଆପଣଙ୍କ ପାଣି ପିଇବା ସହିତ ଜଡ଼ିତ ପ୍ରକ୍ରିୟା ମାନଙ୍କୁ ବଦଳେଇଛି କି, ଯେପରିକି ଆପଣ ପାଣି କେଉଁଠାରୁ ଆଣନ୍ତି, ତାକୁ କିପରି ରଖନ୍ତି କିମ୍ବା କିପରି ପରିଷ୍କାର କରନ୍ତି? ଦୟାକରି ବର୍ଣ୍ଣନା କରନ୍ତୁ।</p> | <p>Change in <b>where you get</b> your drinking water?<br/>ଆପଣ ପିଇବା ପାଣି ଆଣୁଥିବା ସ୍ଥାନରେ ପରିବର୍ତ୍ତନ?</p> <p><input type="checkbox"/> 1. Yes ହଁ</p> <p><input type="checkbox"/> 2. No ନାହିଁ</p> <p>Change in <b>how you store</b> your drinking water?<br/>ଆପଣ କିପରି ପିଇବା ପାଣିକୁ ରଖନ୍ତି, ସେଥିରେ ପରିବର୍ତ୍ତନ?</p> <p><input type="checkbox"/> 1. Yes ହଁ</p> <p><input type="checkbox"/> 2. No ନାହିଁ</p> <p>Change in whether or not you <b>clean/treat</b> your drinking water?<br/>ଆପଣ ନିଜ ପିଇବା ପାଣିକୁ କିପରି ସଫା/ପରିଷ୍କାର କରନ୍ତି, ସେଥିରେ ପରିବର୍ତ୍ତନ?</p> <p><input type="checkbox"/> 1. Yes ହଁ</p> <p><input type="checkbox"/> 2. No ନାହିଁ</p> <p><b><u>Please explain. ଦୟାକରି ବର୍ଣ୍ଣନା କରନ୍ତୁ</u></b></p> |
| <p><b>C14.</b> Has coronavirus or the lockdown changed your <b>household cleaning practices</b>? Please explain.</p> <p>କଣ କରୋନାଭାଇରସ କିମ୍ବା ଲକଡାଉନ ଆପଣଙ୍କ ଘର ସଫା କରିବା ପ୍ରକ୍ରିୟାକୁ ବଦଳେଇଛି? ଦୟାକରି ବର୍ଣ୍ଣନା କରନ୍ତୁ</p>                                                                                                                                                                                                   | <p><input type="checkbox"/> 1. Yes ହଁ</p> <p><input type="checkbox"/> 2. No ନାହିଁ</p> <p><b><u>Please explain. ଦୟାକରି ବର୍ଣ୍ଣନା କରନ୍ତୁ</u></b></p>                                                                                                                                                                                                                                                                                                                                                                                                                                                                                                                                                           |

## COVID-19 Mobile Phone Interview – Head of Household

|                                                                                                                                                                                                                                                                                                                                                                                                                       |                                                                                                                                                                                                                                                                                                                                                                                                                                                                                                                                                                                                                                                                                                                                                                                                                                                                                                                                                                                                                                                                                                                                                                                                                                                                                                                                                                                                                                                                                                                                                                                                                                                                                                                                                          |
|-----------------------------------------------------------------------------------------------------------------------------------------------------------------------------------------------------------------------------------------------------------------------------------------------------------------------------------------------------------------------------------------------------------------------|----------------------------------------------------------------------------------------------------------------------------------------------------------------------------------------------------------------------------------------------------------------------------------------------------------------------------------------------------------------------------------------------------------------------------------------------------------------------------------------------------------------------------------------------------------------------------------------------------------------------------------------------------------------------------------------------------------------------------------------------------------------------------------------------------------------------------------------------------------------------------------------------------------------------------------------------------------------------------------------------------------------------------------------------------------------------------------------------------------------------------------------------------------------------------------------------------------------------------------------------------------------------------------------------------------------------------------------------------------------------------------------------------------------------------------------------------------------------------------------------------------------------------------------------------------------------------------------------------------------------------------------------------------------------------------------------------------------------------------------------------------|
| <p><b>Probes:</b> Has there been any change in <b>how often</b> you clean your home?</p> <p>କଣ ଆପଣ ପ୍ରାୟତଃ କେତେଥର ଘର ସଫା କରନ୍ତି, ସେଥିରେ କିଛି ପରିବର୍ତ୍ତନ ଆସିଛି କି ?</p> <p>Has there been any change in <b>how much detergent/disinfectant or water you use</b> to clean your home?</p> <p>କଣ ଆପଣ ଘର ସଫା କରିବା ପାଇଁ ପ୍ରାୟତଃ ଯେତେ ଲୁଗାଧୁଆ ପାଉଁଶ/ଫିନାଇଲ କିମ୍ବା ପାଣି ବ୍ୟବହାର କରନ୍ତି, ସେଥିରେ କିଛି ପରିବର୍ତ୍ତନ ହେଉଛି କି?</p> |                                                                                                                                                                                                                                                                                                                                                                                                                                                                                                                                                                                                                                                                                                                                                                                                                                                                                                                                                                                                                                                                                                                                                                                                                                                                                                                                                                                                                                                                                                                                                                                                                                                                                                                                                          |
| <p><b>C15.</b> Do you currently have soap or detergent in your household?</p> <p>ଆପଣଙ୍କ ଗହରେ ବର୍ତ୍ତମାନ ସାବୁନ କିମ୍ବା ଲୁଗାଧୁଆ ପାଉଁଶ ଅଛି କି?</p>                                                                                                                                                                                                                                                                         | <div style="margin-bottom: 10px;"> <input type="checkbox"/> 1. Yes ହଁ<br/> <input type="checkbox"/> 2. No ନାହିଁ → <b>Ask followup question C15A</b><br/> <input type="checkbox"/> 99. Don't know ଜାଣି ନାହିଁ         </div> <p><u>If answered no, ask:</u><br/> <b>C15A.</b> The last time you needed to purchase soap for your household, did you experience any of the following?</p> <p>ଶେଷଥର ପାଇଁ, ଯେବେ ଆପଣ ନିଜ ଘର ପାଇଁ ସାବୁନ କିଣିବାକୁ ଭାବିଲେ, କଣ ଆପଣ ଉକ୍ତ ଅନୁଭବ କରିଛନ୍ତି କି?</p> <p>Enumerator: read all response options. Record any explanations the respondent gives.<br/>         ଏନୁମରେଟର ନୋଟ : ସମସ୍ତ ବିକଳ୍ପ ଉତ୍ତରଗୁଡ଼ିକୁ ପଢନ୍ତୁ । ଉତ୍ତରଦାତା ଦେଇଥିବା ଯେକୌଣସି ବର୍ଣ୍ଣନା କୁ ଟିପନ୍ତୁ</p> <div style="margin-bottom: 10px;"> <input type="checkbox"/> 1. Difficulties in going to obtain <b>soap</b> due to mobility restrictions imposed by government<br/>             ସରକାରଙ୍କ ପ୍ରତିବନ୍ଧକ ମାନଙ୍କ ପାଇଁ ଦୋକାନକୁ ସାବୁନ କିଣିବାକୁ ଯିବାରେ ଅସୁବିଧା ହେଉଛି         </div> <div style="margin-bottom: 10px;"> <input type="checkbox"/> 2. Unable to buy the amount of <b>soap</b> we usually buy because the household income has dropped<br/>             ଘରର ଆୟ କମିଯିବା ଯୋଗୁଁ ଆମେ ସାଧାରଣତଃ ଯେତେ ସାବୁନ କିଣୁ, ତାହା କିଣିପାରୁନାହିଁ         </div> <div style="margin-bottom: 10px;"> <input type="checkbox"/> 3. Unable to buy the amount of <b>soap</b> we usually buy because of limited supply<br/>             ସୀମିତ ଯୋଗାଣ ଯୋଗୁଁ ଆମେ ସାଧାରଣତଃ ଯେତେ ସାବୁନ କିଣୁ, ତାହା କିଣିପାରୁନାହିଁ         </div> <div style="margin-bottom: 10px;"> <input type="checkbox"/> 88. Other ଅନ୍ୟାନ୍ୟ: _____         </div> <p><b><u>Record any explanations the respondent gives for this question:</u></b><br/>             ଉତ୍ତରଦାତା ଦେଇଥିବା ଯେକୌଣସି ବର୍ଣ୍ଣନା କୁ ଟିପନ୍ତୁ</p> |

## COVID-19 Mobile Phone Interview – Head of Household

|                                                                                                                                                                                                                                                                                                                        |                                                                                                                                                                                                                                                                                                                                                                                                                                                                                                                                                                                                                                                                                                                                                                                                                                                                        |
|------------------------------------------------------------------------------------------------------------------------------------------------------------------------------------------------------------------------------------------------------------------------------------------------------------------------|------------------------------------------------------------------------------------------------------------------------------------------------------------------------------------------------------------------------------------------------------------------------------------------------------------------------------------------------------------------------------------------------------------------------------------------------------------------------------------------------------------------------------------------------------------------------------------------------------------------------------------------------------------------------------------------------------------------------------------------------------------------------------------------------------------------------------------------------------------------------|
|                                                                                                                                                                                                                                                                                                                        |                                                                                                                                                                                                                                                                                                                                                                                                                                                                                                                                                                                                                                                                                                                                                                                                                                                                        |
| <b>SECTION D: Household Information</b>                                                                                                                                                                                                                                                                                |                                                                                                                                                                                                                                                                                                                                                                                                                                                                                                                                                                                                                                                                                                                                                                                                                                                                        |
| <p><b>Enumerator read:</b> Thank you for your responses about coronavirus. Now I'm going to ask you some questions about your household. This is the last section of the survey!</p> <p>କରୋନାଭାଇରସ ଉପରେ ଆପଣଙ୍କ ଉତ୍ତର ପାଇଁ ଧନ୍ୟବାଦ। ମୁଁ ବର୍ତ୍ତମାନ ଆପଣଙ୍କୁ କିଛି ପ୍ରଶ୍ନ ନିଜ ଘର ବିଷୟରେ ପଚାରିବି। ଏହା ସର୍ବେକ୍ଷର ଶେଷ ଭାଗ।</p> |                                                                                                                                                                                                                                                                                                                                                                                                                                                                                                                                                                                                                                                                                                                                                                                                                                                                        |
| <p><b>D1. What is the highest level of education that you have had?</b></p> <p>ଆପଣ ସର୍ବୋଚ୍ଚ କେତେ ପାଠ ପଢ଼ିଛନ୍ତି?</p>                                                                                                                                                                                                    | <div style="display: flex; flex-direction: column; gap: 5px;"> <input type="checkbox"/> 1. No formal schooling ସ୍କୁଲ ଯାଇନାହାନ୍ତି                 <input type="checkbox"/> 2. Some primary education କିଛି ପ୍ରାଥମିକ ପାଠ                 <input type="checkbox"/> 3. Completed primary education ପ୍ରାଥମିକ ପାଠ ଶେଷ                 <input type="checkbox"/> 4. Some secondary school କିଛି ଟା ସେକେଣ୍ଡରୀ ପାଠ                 <input type="checkbox"/> 5. Matriculation (10<sup>th</sup> class completed) ମେଟ୍ରିକୁଲେଶନ                 <input type="checkbox"/> 6. Completed secondary school କିଛି ଟା ସେକେଣ୍ଡରୀ ପାଠ ଶେଷ                 <input type="checkbox"/> 7. Some college କିଛି କଲେଜ                 <input type="checkbox"/> 8. Completed college/university କଲେଜ/ୟୁନିଭରସିଟି ଶେଷ                 <input type="checkbox"/> 99. Don't know ଜାଣି ନାହିଁ             </div> |
| <p><b>D2. What is your occupation?</b></p> <p>ଆପଣଙ୍କ ବୃତ୍ତି କଣ ?</p>                                                                                                                                                                                                                                                   | <div style="display: flex; flex-direction: column; gap: 5px;"> <input type="checkbox"/> 1. Unemployed (no work that earns money)<br/>ବେରୋଜଗାର(ରୋଜଗାର କରିଲା ଭଳିଆ କିଛି କାମ କରନ୍ତିନାହିଁ)                 <input type="checkbox"/> 2. Self-Employed (Work in home: agriculture, potter, etc.)<br/>ନିଜସ୍ବ ରୋଜଗାର(ଯେମିତିକି- ଚାଷ, କୁସାର, ଅନ୍ୟାନ୍ୟ)                 <input type="checkbox"/> 3. Employed (Work outside the home: office, labourer, factory, etc.)<br/>ଚାକିରି(ଘରଠାରୁ ବାହାରେ କାମ କରନ୍ତି : ଉଦାହରଣ –ଅଫିସ୍, ଫ୍ୟାକ୍ଟ୍ରି, ଅନ୍ୟାନ୍ୟ)                 <input type="checkbox"/> 4. Student ଛାତ୍ର             </div>                                                                                                                                                                                                                                                      |
| <p><b>D3. What is the caste or tribe of the household?</b></p> <p>ଆପଣଙ୍କର କେଉଁ - *ଜାତି ବା ଜନଜାତି* ?</p> <p>Enumerator note: Read response options<br/>ଏମାନେଟର ନୋଟ : ଉତ୍ତର ଅପସନସ୍ ଗୁଡ଼ିକୁ ପଢନ୍ତୁ ।</p>                                                                                                                  | <div style="display: flex; flex-direction: column; gap: 5px;"> <input type="checkbox"/> 1. Brahmin ବ୍ରାହ୍ମଣ                 <input type="checkbox"/> 2. General ସାଧାରଣ                 <input type="checkbox"/> 3. Scheduled caste ଅନୁସୂଚିତ ଜାତି                 <input type="checkbox"/> 4. Other backward caste ଅନ୍ୟ ପଛୁଆ ବର୍ଗ                 <input type="checkbox"/> 5. Scheduled tribe ଅନୁସୂଚିତ ଜନଜାତି                 <input type="checkbox"/> 6. Do not want to indicate caste ଜାତି କହିବାକୁ ଚାହୁଁନାହାନ୍ତି                 <input type="checkbox"/> 77. Not applicable ଉପଯୁକ୍ତ ନୁହେଁ                 <input type="checkbox"/> 88. Other ଅନ୍ୟାନ୍ୟ: _____                 <input type="checkbox"/> 99. Don't know ଜାଣି ନାହିଁ             </div>                                                                                                                   |
| <p><b>D4. What is the religion of the household?</b></p> <p>ଆପଣଙ୍କର *କେଉଁ ଧର୍ମ*?</p>                                                                                                                                                                                                                                   | <div style="display: flex; flex-direction: column; gap: 5px;"> <input type="checkbox"/> 1. Hindu ହିନ୍ଦୁ                 <input type="checkbox"/> 2. Muslim ମୁସଲମାନ୍                 <input type="checkbox"/> 3. Christian ଖ୍ରୀଷ୍ଟିଆନ୍                 <input type="checkbox"/> 4. Sikh ଶିଖ୍             </div>                                                                                                                                                                                                                                                                                                                                                                                                                                                                                                                                                         |



## COVID-19 Mobile Phone Interview – Head of Household

|                                                                                                                                                                                                                                                                                                 |                                                                                                                                                                                                                                                                                                                                        |
|-------------------------------------------------------------------------------------------------------------------------------------------------------------------------------------------------------------------------------------------------------------------------------------------------|----------------------------------------------------------------------------------------------------------------------------------------------------------------------------------------------------------------------------------------------------------------------------------------------------------------------------------------|
|                                                                                                                                                                                                                                                                                                 | <input type="checkbox"/> 5. Buddhist/Neo-buddhist ବୌଦ୍ଧ ଧର୍ମ<br><input type="checkbox"/> 6. Jain ଜୈନ ଧର୍ମ<br><input type="checkbox"/> 7. Jewish ଜୀଉ ଧର୍ମ<br><input type="checkbox"/> 8. Parsi/Zorastrian ପାର୍ସୀ ଧର୍ମ<br><input type="checkbox"/> 9. No Religion କୌଣସି ଧର୍ମ ନୁହେଁ<br><input type="checkbox"/> 88. Other ଅନ୍ୟାନ୍ୟ: _____ |
| <b>D5. Do you have an Antodaya Card and/or ration card? (select all that apply)</b><br>ଆପଣଙ୍କର ଅନ୍ତୋଦୟ /ରାସନ୍ କାର୍ଡ ଅଛି କି?                                                                                                                                                                     | <input type="checkbox"/> 1. Antodaya ଅନ୍ତୋଦୟ<br><input type="checkbox"/> 2. Ration card ରାସନ୍ କାର୍ଡ<br><input type="checkbox"/> 3. None କିଛି ନାହିଁ<br><input type="checkbox"/> 99. Don't know ଜାଣି ନାହିଁ                                                                                                                               |
| <b>END OF INTERVIEW:</b> Thank the respondent for their time and give them the COVID-19 information and resources summary provided by Gram Vikas.<br><br>ସାକ୍ଷାତକରଣ ଶେଷ: ଉତ୍ତରଦାତାଙ୍କୁ ତାଙ୍କ ସମୟ ପାଇଁ ଧନ୍ୟବାଦ ଜଣାନ୍ତୁ ଏବଂ ତାଙ୍କୁ ଗ୍ରାମବିକାଶ ଦ୍ୱାରା ଦିଆଯାଇଥିବା COVID-19 ସୂଚନା ବିଷୟରେ ଅବଗତ କରନ୍ତୁ |                                                                                                                                                                                                                                                                                                                                        |
| <b>End Time</b><br>ଶେଷ ସମୟ                                                                                                                                                                                                                                                                      |                                                                                                                                                                                                                                                                                                                                        |

## COVID-19 Mobile Phone Interview – VWSC

| SECTION A: Respondent and Enumerator Information & Consent Process                                                                                                                                                                                                                                                            |                                                                                                                                                                                                                                                                                                                                                                                                                                                                                                                                                                                                |
|-------------------------------------------------------------------------------------------------------------------------------------------------------------------------------------------------------------------------------------------------------------------------------------------------------------------------------|------------------------------------------------------------------------------------------------------------------------------------------------------------------------------------------------------------------------------------------------------------------------------------------------------------------------------------------------------------------------------------------------------------------------------------------------------------------------------------------------------------------------------------------------------------------------------------------------|
| <b>A1.</b> Village ID ଗ୍ରାମ ର କୋଡ଼:                                                                                                                                                                                                                                                                                           | <b>A2.</b> Household ID ଘର ଘରର ସଂଖ୍ୟା                                                                                                                                                                                                                                                                                                                                                                                                                                                                                                                                                          |
| <b>A3.</b> Village Name ଗ୍ରାମ ର ନାମ                                                                                                                                                                                                                                                                                           |                                                                                                                                                                                                                                                                                                                                                                                                                                                                                                                                                                                                |
| <b>A4.</b> Date ତାରିଖ                                                                                                                                                                                                                                                                                                         | (y/d/m)                                                                                                                                                                                                                                                                                                                                                                                                                                                                                                                                                                                        |
| <b>A5.</b> Start Time ଆରମ୍ଭ ସମୟ                                                                                                                                                                                                                                                                                               |                                                                                                                                                                                                                                                                                                                                                                                                                                                                                                                                                                                                |
| <b>A6.</b> Enumerator name ଆପଣଙ୍କ ନାମ                                                                                                                                                                                                                                                                                         | <input type="checkbox"/> 1. Alok<br><input type="checkbox"/> 2. Dhiren<br><input type="checkbox"/> 3. Varsha                                                                                                                                                                                                                                                                                                                                                                                                                                                                                   |
| <b>A7.</b> Confirm that the respondent and their family (if applicable) currently live in the intended village (and are not currently staying somewhere else).<br><br>ପୁଷ୍ଟି କରନ୍ତୁ କି ଯେ, ଉପଯୁକ୍ତ ଉତ୍ତରଦାତା ଏବଂ ତାଙ୍କ ପରିବାର (ଯଦି ଲାଗୁ ହୁଏ) ବର୍ତ୍ତମାନ ଉଦ୍ଦିଷ୍ଟ ଗ୍ରାମରେ ହିଁ ବସବାସ କରନ୍ତି (ଏବଂ ଅନ୍ୟ କେଉଁଠି ବସବାସ କରନ୍ତି ନାହିଁ) | <input type="checkbox"/> 1. Yes ହଁ<br><input type="checkbox"/> 2. No – respondent/family are staying outside the village and left <i>before</i> the pandemic → <b>END SURVEY</b><br>ନା - ଉତ୍ତରଦାତା ଓ ତାଙ୍କ ପରିବାର ଗ୍ରାମ ବାହାରେ ବସବାସ କରନ୍ତି ଏବଂ ସର୍ବବ୍ୟାପୀ ମହାମାରୀ ହେବା ପୂର୍ବରୁ ଗ୍ରାମ ଛାଡି ଦେଇଛନ୍ତି - ସତ୍ତେ ଶେଷ<br><input type="checkbox"/> 3. No – respondent/family are staying outside the village and left <i>because of</i> the pandemic → <b>END SURVEY</b><br>ନା- ଉତ୍ତରଦାତା ଓ ତାଙ୍କ ପରିବାର ଗ୍ରାମ ବାହାରେ ବସବାସ କରନ୍ତି ଏବଂ ସର୍ବବ୍ୟାପୀ ମହାମାରୀ ହେବା କାରଣରୁ ଗ୍ରାମ ଛାଡି ଦେଇଛନ୍ତି - ସତ୍ତେ ଶେଷ |
| <b>A8a.</b> Read the consent form to the respondent and then ask for their consent to participate.<br><br>ଉତ୍ତରଦାତାଙ୍କ ପାଇଁ ସହମତି ପତ୍ରଟିକୁ ପଢନ୍ତୁ ଏବଂ ତାଙ୍କୁ ସତ୍ତେରେ ଅଂଶଗ୍ରହଣ ପାଇଁ ସହମତି ମାଗନ୍ତୁ।<br><br>Does the respondent consent to the survey?<br>କ'ଣ ଉତ୍ତରଦାତା ସତ୍ତେରେ ଅଂଶଗ୍ରହଣ ପାଇଁ ସହମତି ପ୍ରଦାନ କଲେ?                  | <input type="checkbox"/> 1. Yes ହଁ<br><input type="checkbox"/> 2. No → <b>END SURVEY</b> ନା - ସତ୍ତେ ଶେଷ                                                                                                                                                                                                                                                                                                                                                                                                                                                                                        |
| <b>A8b.</b> Does the respondent consent to having the phone call audio recorded?<br><br>କଣ ଉତ୍ତରଦାତା ଫୋନକଲର ରେକର୍ଡିଙ୍ଗ ପାଇଁ ସହମତି ପ୍ରଦାନ କଲେ?                                                                                                                                                                                 | <input type="checkbox"/> 1. Yes ହଁ<br><input type="checkbox"/> 2. No ନା → Pause when you need to in order to record detailed responses! ଯେତେବେଳେ ଉତ୍ତର ଲେଖିବା ଆବଶ୍ୟକ ପଡେ, ବିରାମ ନିଅନ୍ତୁ।                                                                                                                                                                                                                                                                                                                                                                                                       |
| <b>ENUMERATOR NOTE:</b> Now you are going to begin the survey.<br>ଏନ୍ୟୁମରେଟରଙ୍କ ପାଇଁ ନୋଟ: ବର୍ତ୍ତମାନ ଆପଣ ସତ୍ତେ ଆରମ୍ଭ କରିବେ                                                                                                                                                                                                     |                                                                                                                                                                                                                                                                                                                                                                                                                                                                                                                                                                                                |
| <b>A9.</b> What is your name?<br>ଆପଣଙ୍କ ନାମ କଣ ?                                                                                                                                                                                                                                                                              |                                                                                                                                                                                                                                                                                                                                                                                                                                                                                                                                                                                                |

## COVID-19 Mobile Phone Interview – VWSC

|                                                                                                                                                                                                                                                                                                                |                                                                                                                                                                                                                                                     |
|----------------------------------------------------------------------------------------------------------------------------------------------------------------------------------------------------------------------------------------------------------------------------------------------------------------|-----------------------------------------------------------------------------------------------------------------------------------------------------------------------------------------------------------------------------------------------------|
| <p><b>A10.</b> What is the sex of the respondent?<br/>ଉତ୍ତରଦାତାଙ୍କ ଲିଙ୍ଗ କଣ?</p> <p>Enumerator Note: Clarify with the respondent if you are not sure.<br/>ଏନ୍ୟୁମରେଟର ନୋଟ - ସ୍ପଷ୍ଟ କରନ୍ତୁ ଯେବେ ଆପଣ ନିଶ୍ଚିତ ନୁହନ୍ତି</p>                                                                                          | <p><input type="checkbox"/> 1. Male ପୁରୁଷ</p> <p><input type="checkbox"/> 2. Female ମହିଳା</p>                                                                                                                                                       |
| <p><b>A11.</b> What is your age?<br/>ଆପଣଙ୍କ ବୟସ କେତେ?</p>                                                                                                                                                                                                                                                      | <p style="text-align: center;">(years) (ବର୍ଷ)</p>                                                                                                                                                                                                   |
| <p><b>SECTION E: Additional questions for village stakeholders ONLY (e.g., VWSC members, ASHA or Anganwadi workers)</b></p>                                                                                                                                                                                    |                                                                                                                                                                                                                                                     |
| <p><b>E1.</b> Type of stakeholder</p>                                                                                                                                                                                                                                                                          | <p><input type="checkbox"/> 1. VWSC president</p> <p><input type="checkbox"/> 2. VWSC member</p> <p><input type="checkbox"/> 3. ASHA worker</p> <p><input type="checkbox"/> 4. Anganwadi worker</p> <p><input type="checkbox"/> 5. Other: _____</p> |
| <p><b>E2.</b> Has the government or any NGOs provided any materials to your village related to coronavirus?<br/><br/>କଣ ସରକାର କିମ୍ବା କୌଣସି ଏନଜିଓ ଆପଣଙ୍କ ଗ୍ରାମକୁ କରୋନାଭାଇରସ ସମ୍ବନ୍ଧୀୟ କିଛି ଜିନିଷ ଯୋଗାଇଛନ୍ତି କି?</p> <p>If yes, please describe.<br/>ଯଦି ହଁ, ଦୟାକରି ବର୍ଣ୍ଣନା କରନ୍ତୁ</p>                          | <p><input type="checkbox"/> 1. Yes</p> <p><input type="checkbox"/> 2. No</p> <p><b><u>If yes, describe:</u></b><br/><b><u>ଯଦି ହଁ, ବର୍ଣ୍ଣନା କରନ୍ତୁ</u></b></p>                                                                                       |
| <p><b>E4.</b> Has any guidance been provided to your village from the government or an NGO about what someone should do if they think they have been exposed to or might have coronavirus?<br/><br/>କଣ କେଉଁ ଏନଜିଓ କିମ୍ବା ସରକାର ଆପଣଙ୍କୁ ଏହି ନିର୍ଦ୍ଦେଶାବଳୀ ଦେଇଛନ୍ତି କି ଯେ ଯଦି କାହାକୁ ଏହା ଲାଗିଲା ଯେ ସେମାନଙ୍କୁ</p> | <p><input type="checkbox"/> 1. Yes – Government ହଁ-ସରକାର</p> <p><input type="checkbox"/> 2. Yes – NGO ହଁ-ଏନଜିଓ</p> <p><input type="checkbox"/> 3. Yes – Both – ହଁ-ଉଭୟ</p> <p><input type="checkbox"/> 4. No – ନାହିଁ</p>                             |

## COVID-19 Mobile Phone Interview – VWSC

|                                                                                                                                                                                                                                                                                                                                                                                 |                                                                                                                                                                              |
|---------------------------------------------------------------------------------------------------------------------------------------------------------------------------------------------------------------------------------------------------------------------------------------------------------------------------------------------------------------------------------|------------------------------------------------------------------------------------------------------------------------------------------------------------------------------|
| <p>କାରୋନାଭାଇରସ ହେଉଛି, ତାହେଲେ କଣ କରିବା ଉଚିତ?</p> <p>If yes, please describe.</p> <p>ଯଦି ହଁ, ଦୟାକରି ବର୍ଣ୍ଣନା କରନ୍ତୁ</p>                                                                                                                                                                                                                                                           | <p><b><u>If yes, describe:</u></b></p> <p>ଯଦି ହଁ, ବର୍ଣ୍ଣନା କରନ୍ତୁ</p>                                                                                                        |
| <p><b>E5. What actions has this village taken as a community to protect itself against coronavirus? How were these actions decided upon?</b></p> <p>ଏକ ଗୋଷ୍ଠୀ ହିସାବରେ ଏହି ଗ୍ରାମରେ କାରୋନା ଠାରୁ ରକ୍ଷା ପାଇବାକୁ କିଛି ପଦକ୍ଷେପ ଗ୍ରହଣ କରା ଯାଇଛି କି? ଏହି ପଦକ୍ଷେପ ଗୁଡ଼ିକ ବିଷୟରେ କିପରି ନିଷ୍ପତ୍ତି ନିଆଗଲା?</p>                                                                              |                                                                                                                                                                              |
| <p><b>E6. Do you feel most villagers are taking precautions for preventing coronavirus (such as avoiding gatherings, washing their hands, etc.)? Why or why not?</b></p> <p>ଆପଣଙ୍କୁ ଏହା ଲାଗୁଛି କି ଯେ, ସର୍ବାଧିକ ଗ୍ରାମବାସୀ କରୋନାଭାଇରସରୁ ରକ୍ଷା ପାଇବା ସକାଶେ କାଉନସାଇ ସତର୍କତା ଅବଲମ୍ବନ କରୁଛନ୍ତି ଯେପରିକି ସାମାଜିକ ସମାବେଶରୁ ଦୂରେଇ ରହବା, ହାତ ଧୋଇବା ଇତ୍ୟାଦି? କାହିଁକି ଏବଂ କାହିଁକି ନୁହେଁ?</p> |                                                                                                                                                                              |
| <p><b>E7. Is there any place in your village for migrants coming back to the village to quarantine/isolate temporarily upon arrival?</b></p> <p>ଆପଣଙ୍କ ଗ୍ରାମରେ ଏପରି କିଛି ଜାଗା ଅଛିକି ଯେଉଁଠିକି ପ୍ରବାସୀ ଶ୍ରମିକ ମାନେ ଆସିବା ପରେ ନିଜକୁ ସଙ୍ଗରୋଧରେ ରଖିପାରିବେ କିମ୍ବା ଅସ୍ଥାୟୀ ଭାବରେ ନିଜକୁ ଅଲଗା କରି ରଖି ପାରିବେ?</p> <p>If yes, please describe.</p> <p>ଯଦି ହଁ, ଦୟାକରି ବର୍ଣ୍ଣନା କରନ୍ତୁ</p>  | <p><input type="checkbox"/> 1. Yes- ହଁ</p> <p><input type="checkbox"/> 2. No ନାହିଁ</p> <p><b><u>If yes, describe. If no, why not?</u></b></p> <p>ଯଦି ହଁ, ବର୍ଣ୍ଣନା କରନ୍ତୁ</p> |

## COVID-19 Mobile Phone Interview – VWSC

|                                                                                                                                                                                                                                                                                 |                                                                                                                                                                                                             |
|---------------------------------------------------------------------------------------------------------------------------------------------------------------------------------------------------------------------------------------------------------------------------------|-------------------------------------------------------------------------------------------------------------------------------------------------------------------------------------------------------------|
| <p><b>E8. Have any migrants returned to the village?</b><br/>If yes, describe how they were treated by other village members.</p> <p>କଣ କେହି ପ୍ରବାସୀ ଶ୍ରମିକ ଆପଣଙ୍କ ଗାଁକୁ ଫେରିଛନ୍ତି? ଯଦି ହଁ, ବର୍ଣ୍ଣନା କରନ୍ତୁ ଯେ କିପରି ଗ୍ରାମର ସଦସ୍ୟ ମାନେ ସେମାନଙ୍କ ସହିତ କି ପ୍ରକାର ଆଚରଣ କଲେ?</p>    | <div style="margin-bottom: 10px;"> <input type="checkbox"/> 1. Yes ହଁ<br/> <input type="checkbox"/> 2. No ନାହିଁ         </div> <p><b><u>If yes, describe:</u></b></p> <p><u>ଯଦି ହଁ, ବର୍ଣ୍ଣନା କରନ୍ତୁ</u></p> |
| <p><b>E9. If someone in your village wanted to get tested for coronavirus, where could they go to get tested? Please describe.</b></p> <p>ଯଦି ଆପଣଙ୍କ ଗ୍ରାମର କେହି କରୋନାଭାଇରସ ପାଇଁ ନିଜର ପରୀକ୍ଷଣ କରିବାକୁ ଚାହାନ୍ତି, ସେ କେଉଁଠିକୁ ଯାଇ ପରୀକ୍ଷଣ କରି ପାରିବେ? ଦୟାକରି ବର୍ଣ୍ଣନା କରନ୍ତୁ।</p> |                                                                                                                                                                                                             |
| <p><b>E10. Has anyone in your village tested positive for coronavirus?</b></p> <p>ଆପଣଙ୍କ ଗ୍ରାମରେ କେହି କରୋନାଭାଇରସ ପଜିଟିଭ ହୋଇଛି କି?</p>                                                                                                                                           | <div style="margin-bottom: 10px;"> <input type="checkbox"/> 1. Yes ହଁ<br/> <input type="checkbox"/> 2. No ନାହିଁ         </div> <input type="checkbox"/> 3. Don't know ଜାଣି ନାହିଁ                            |
| <p><b>E11. How has daily life in your village changed as a result of coronavirus? Please describe.</b></p> <p>ଆପଣଙ୍କ ଗ୍ରାମର ଦୈନନ୍ଦିନ ଜୀବନରେ କରୋନାଭାଇରସ ଯୋଗୁଁ କି ପରିବର୍ତ୍ତନ ଆସିଛି?</p>                                                                                           |                                                                                                                                                                                                             |
| <p><b>E12. How have social interactions in the village changed as a result of coronavirus? Please describe.</b></p> <p>ଆପଣଙ୍କ ଗ୍ରାମରେ ସାମାଜିକ ମିଳାମିଶାରେ କରୋନାଭାଇରସ</p>                                                                                                         |                                                                                                                                                                                                             |

## COVID-19 Mobile Phone Interview – VWSC

|                                                                                                                                                                                                                                                                                               |                                                                                                                                                                                                                                                                                                                                                                                                                                                                                                                  |
|-----------------------------------------------------------------------------------------------------------------------------------------------------------------------------------------------------------------------------------------------------------------------------------------------|------------------------------------------------------------------------------------------------------------------------------------------------------------------------------------------------------------------------------------------------------------------------------------------------------------------------------------------------------------------------------------------------------------------------------------------------------------------------------------------------------------------|
| <p>ଯୋଗୁଁ କି ପରିବର୍ତ୍ତନ ଆସିଛି? ଦୟାକରି ବର୍ଣ୍ଣନା କରନ୍ତୁ।</p>                                                                                                                                                                                                                                     |                                                                                                                                                                                                                                                                                                                                                                                                                                                                                                                  |
| <p><b>E13.</b> Since coronavirus or the lockdown, have you noticed an increase in any of the following village issues?</p> <p>କରୋନାଭାଇରସ କିମ୍ବା ଲକଡାଉନ ଠାରୁ କଣ ଆପଣ ଉକ୍ତ ଗ୍ରାମୀଣ ସମସ୍ୟା ରେ କିଛି ବୃଦ୍ଧି ଦେଖୁଛନ୍ତି କି?</p> <p>If yes, please describe.</p> <p>ଯଦି ହଁ, ଦୟାକରି ବର୍ଣ୍ଣନା କରନ୍ତୁ</p> | <div style="margin-bottom: 10px;"> <input type="checkbox"/> 1. Domestic Violence ଘରୋଇ ହିଂସା<br/> <input type="checkbox"/> 2. Alcoholism ମଦ୍ୟପାନ<br/> <input type="checkbox"/> 3. Fighting ଝଗଡ଼ା<br/> <input type="checkbox"/> 4. Theft ଚୋରି<br/> <input type="checkbox"/> 5. None କିଛି ନୁହେଁ<br/> <input type="checkbox"/> 88. Other ଅନ୍ୟାୟ: _____         </div> <p><b><u>If yes, describe:</u></b></p> <p><u>ଯଦି ହଁ, ବର୍ଣ୍ଣନା କରନ୍ତୁ</u></p>                                                                   |
| <p><b>E14.</b> What changes, if any, have been made to the piped water supply service as a result of coronavirus?</p> <p>କରୋନାଭାଇରସ ପାଇଁ ପାଇପ୍ଡ ହାରା ଜଳଯୋଗାଣରେ କିଛି ପରିବର୍ତ୍ତନ କରାଯାଇଛି କି?</p> <p>Enumerator note: read response options</p>                                                 | <div style="margin-bottom: 10px;"> <input type="checkbox"/> 1. Extend the hours of piped water ଜଳଯୋଗାଣର ଘଣ୍ଟାକୁ ବଢ଼େଇ ଦିଆ ଯାଇଛି<br/> <input type="checkbox"/> 2. Reduce the hours of piped water ଜଳଯୋଗାଣର ଘଣ୍ଟାକୁ କମେଇ ଦିଆ ଯାଇଛି<br/> <input type="checkbox"/> 3. Treatment of piped water<br/> <input type="checkbox"/> 4. None<br/> <input type="checkbox"/> 88. Other ଅନ୍ୟାୟ: _____         </div> <p><b><u>If any explanations given during response:</u></b></p> <p><u>କଣ କିଛି ବିବରଣୀ ଦିଆଯାଇଛି କି ?</u></p> |
| <p><b>E15.</b> Are there any resources or needs of your village related to coronavirus that you do NOT think have been adequately addressed?</p>                                                                                                                                              | <input type="checkbox"/> 1. Yes ହଁ                                                                                                                                                                                                                                                                                                                                                                                                                                                                               |

## COVID-19 Mobile Phone Interview – VWSC

|                                                                                                                                                                                                                      |                                                                                                                                                                                                                                                                    |
|----------------------------------------------------------------------------------------------------------------------------------------------------------------------------------------------------------------------|--------------------------------------------------------------------------------------------------------------------------------------------------------------------------------------------------------------------------------------------------------------------|
| <p>ଆପଣଙ୍କୁ ଏହା ଲାଗୁଛି କି ଯେ, ଆପଣଙ୍କ ଗ୍ରାମରେ କରୋନାଭାଇରସ ସହ ଜଡ଼ିତ କିଛି ସଂସାଧନ କିମ୍ବା ଆବଶ୍ୟକତାର ଅଭାବ ଅଛି?</p> <p>If yes, please describe.</p> <p>ଯଦି ହଁ, ଦୟାକରି ବର୍ଣ୍ଣନା କରନ୍ତୁ</p>                                     | <p><input type="checkbox"/> 2. No ନାହିଁ</p> <p><b><u>If yes, describe:</u></b></p> <p><u>ଯଦି ହଁ, ବର୍ଣ୍ଣନା କରନ୍ତୁ</u></p>                                                                                                                                           |
| <p><b>SECTION A - continued</b></p> <p><b>Enumerator read:</b> Thank you for telling me about experiences in your village. Now I'm going to ask you some questions about your own experiences in your household.</p> |                                                                                                                                                                                                                                                                    |
| <p><b>A12.</b> Including yourself, how many people are currently staying in your house?</p> <p>ଆପଣଙ୍କୁ ମିଶେଇ, ବର୍ତ୍ତମାନ ଆପଣଙ୍କ ଘରେ କେତେଜଣେ ଲୋକ ରୁହନ୍ତି?</p>                                                          |                                                                                                                                                                                                                                                                    |
| <p><b>A13.</b> Are there any children &lt;5 years currently living in your household?</p> <p>କଣ ପାଞ୍ଚ ବର୍ଷରୁ କମ ବୟସର କେହି ପିଲା ବର୍ତ୍ତମାନ ଏହି ଘରେ ବସବାସ କରନ୍ତି କି?</p>                                                | <p><input type="checkbox"/> 1. Yes ହଁ</p> <p><input type="checkbox"/> 2. No ନାହିଁ</p> <p><b><u>If yes, children ages:</u></b></p> <p>Child 1: Years: _____ Months: _____</p> <p>Child 2: Years: _____ Months: _____</p> <p>Child 3: Years: _____ Months: _____</p> |
| <p><b>A14.</b> How many people living in your household are over 60 years old?</p> <p>ଆପଣଙ୍କ ଘରେ ରହୁଥିବା ସଦସ୍ୟ ମାନଙ୍କ ମଧ୍ୟରୁ କେତେ ଜଣଙ୍କ ବୟସ ୬୦ ବର୍ଷରୁ ଉର୍ଦ୍ଧ୍ୱ?</p>                                                  |                                                                                                                                                                                                                                                                    |
| <p><b>A15.</b> How many people living in your household are currently pregnant?</p> <p>ଆପଣଙ୍କ ଘରେ ରହୁଥିବା ସଦସ୍ୟ ମାନଙ୍କ ମଧ୍ୟରୁ କେତେ ଜଣ ଗର୍ଭବତୀ?</p>                                                                   |                                                                                                                                                                                                                                                                    |
| <p><b>A16.</b> Is anyone in your household a daily wage labourer who usually works in another state?</p> <p>କଣ ଆପଣଙ୍କ ଘରର କେହି ଦିନ ମଜୁରିଆ ଅଟନ୍ତି କି ଯେ ସାଧାରଣତଃ ଅନ୍ୟ ରାଜ୍ୟରେ କାମ କରନ୍ତି ?</p>                        | <p><input type="checkbox"/> 1. Yes ହଁ - And they are still residing in another state ହଁ- ସେମାନେ ବର୍ତ୍ତମାନ ମଧ୍ୟ ଅନ୍ୟ ରାଜ୍ୟରେ ରହୁଛନ୍ତି</p> <p><input type="checkbox"/> 2. Yes ହଁ - But now they reside in Odisha ହଁ- କିନ୍ତୁ ସେମାନେ ବର୍ତ୍ତମାନ ଓଡ଼ିଶାରେ ରୁହନ୍ତି</p>    |

## COVID-19 Mobile Phone Interview – VWSC

|                                                                                                                                                                                                                                                                                                                              |                                                                                                                                                                                                                                                                                                                                                                                                                                                                                                                                                                                                                                                                                                                                                                                                                                                                                                                                                                                                                                                                                                                  |
|------------------------------------------------------------------------------------------------------------------------------------------------------------------------------------------------------------------------------------------------------------------------------------------------------------------------------|------------------------------------------------------------------------------------------------------------------------------------------------------------------------------------------------------------------------------------------------------------------------------------------------------------------------------------------------------------------------------------------------------------------------------------------------------------------------------------------------------------------------------------------------------------------------------------------------------------------------------------------------------------------------------------------------------------------------------------------------------------------------------------------------------------------------------------------------------------------------------------------------------------------------------------------------------------------------------------------------------------------------------------------------------------------------------------------------------------------|
|                                                                                                                                                                                                                                                                                                                              | <input type="checkbox"/> 3. No ନା                                                                                                                                                                                                                                                                                                                                                                                                                                                                                                                                                                                                                                                                                                                                                                                                                                                                                                                                                                                                                                                                                |
| <b>A17. Do you or any other family member have any of the following conditions or diseases?</b><br><br>ଆପଣଙ୍କୁ ଅଥବା ଆପଣଙ୍କ ପରିବାରର କେହି ସଦସ୍ୟଙ୍କୁ ଉକ୍ତ ରୋଗ ଅଛି କି?<br><br>Enumerator note: Read each option and select all that apply.<br>ଏନୁମରେଟରଙ୍କ ପାଇଁ ନୋଟ: ବିକଳ ଉତ୍ତର ଗୁଡ଼ିକୁ ପଢନ୍ତୁ।<br>ଦେଇଥିବା ସମସ୍ତ ଉତ୍ତରକୁ ବାଛିନ୍ତୁ | <input type="checkbox"/> 1. Asthma ଶ୍ୱାସ<br><input type="checkbox"/> 2. Diabetes ମଧୁମେହ<br><input type="checkbox"/> 3. Obesity ମୋଟାପଟା<br><input type="checkbox"/> 4. Kidney disease ବୃକକ ରୋଗ<br><input type="checkbox"/> 5. Heart disease ହୃଦରୋଗ<br><input type="checkbox"/> 6. Liver disease ଯକୃତ ରୋଗ<br><input type="checkbox"/> 7. Chronic lung disease ଦୀର୍ଘକାଳୀନ ପୁସ୍ତପୁସ୍ତ ରୋଗ<br><input type="checkbox"/> 8. Cancer କ୍ୟାନ୍ସର<br><input type="checkbox"/> 9. None କିଛି ନାହିଁ                                                                                                                                                                                                                                                                                                                                                                                                                                                                                                                                                                                                                              |
| <b>A18. Do you have piped water to your household or compound?</b><br><br>କଣ ଆପଣଙ୍କ ଘରକୁ ପାଇପ ଯୋଗେ ପାଣିର ବ୍ୟବସ୍ଥା ଅଛି?                                                                                                                                                                                                       | <input type="checkbox"/> 1. Yes – functional ହଁ- ସକ୍ରିୟ<br><input type="checkbox"/> 2. Yes – not functional ହଁ- ନିଷ୍କ୍ରିୟ<br><input type="checkbox"/> 3. No ନା<br><br><b>If 2 or 3:</b><br>What is your primary source of water and where is it located?<br><br><u>ଯଦି 2 କିମ୍ବା 3:</u><br>ଆପଣଙ୍କ ଘରର ମୁଖ୍ୟ ଜଳଉତ୍ସର୍ଗ କଣ ଓ ଏହା କେଉଁଠି ଠାରେ ଅବସ୍ଥିତ?<br><br>Source (ଉତ୍ସ):<br><input type="checkbox"/> 1. Public tap ପବ୍ଲିକ୍‌ଟାପ/ସର୍ବସାଧାରଣଟ୍ୟାପ୍<br><input type="checkbox"/> 2. Well/borehole/spring କୂଅ, ନଳକୂଅ, ଝରଣା<br><input type="checkbox"/> 3. Surface water (river/dam/lake/pond/stream/canal) ଭୂତଳଜଳ(ନଦୀ/ବନ୍ଧ/ହ୍ରଦ/ପୋଖରୀ/ନାଳ/କେନାଲ)<br><input type="checkbox"/> 4. Rainwater ବର୍ଷାପାଣି<br><input type="checkbox"/> 5. Bottled water ବୋତଲପାଣି<br><input type="checkbox"/> 6. Other ଅନ୍ୟାନ୍ୟ<br><input type="checkbox"/> 7. Don't know ଜାଣିନାହିଁ<br><br>Location: ଅବସ୍ଥାନ<br><input type="checkbox"/> 1. In own dwelling ନିଜ ରହିବା ଜାଗାରେ<br><input type="checkbox"/> 2. In own yard/plot/compound ନିଜଜାଗା/ପ୍ଲଟରେ/ଅଗଣାରେ<br><input type="checkbox"/> 3. Outside the household compound ଘର ଅଗଣା/ପରିସର ବାହାରେ |
| <b>A19. Does your household have a latrine?</b><br><br>କଣ ଆପଣଙ୍କ ଘରେ ପାଇଖାନା ଅଛି?                                                                                                                                                                                                                                            | <input type="checkbox"/> 1. Yes – functional ହଁ- ସକ୍ରିୟ<br><input type="checkbox"/> 2. Yes – not functional ହଁ- ନିଷ୍କ୍ରିୟ<br><input type="checkbox"/> 3. No ନାହିଁ                                                                                                                                                                                                                                                                                                                                                                                                                                                                                                                                                                                                                                                                                                                                                                                                                                                                                                                                                |
| <b>A20. Do you have an enclosed bathing area in</b>                                                                                                                                                                                                                                                                          |                                                                                                                                                                                                                                                                                                                                                                                                                                                                                                                                                                                                                                                                                                                                                                                                                                                                                                                                                                                                                                                                                                                  |



## COVID-19 Mobile Phone Interview – VWSC

|                                                                                                                                                                                                                                                                                                                                                                                                                                                                                                                                               |                                                                                                                                                                                                                                                                                                                                                                                                                                                                                                                                                                                                                                                                                                                                                                                                                                                                                                                                                                                                                                                                                         |
|-----------------------------------------------------------------------------------------------------------------------------------------------------------------------------------------------------------------------------------------------------------------------------------------------------------------------------------------------------------------------------------------------------------------------------------------------------------------------------------------------------------------------------------------------|-----------------------------------------------------------------------------------------------------------------------------------------------------------------------------------------------------------------------------------------------------------------------------------------------------------------------------------------------------------------------------------------------------------------------------------------------------------------------------------------------------------------------------------------------------------------------------------------------------------------------------------------------------------------------------------------------------------------------------------------------------------------------------------------------------------------------------------------------------------------------------------------------------------------------------------------------------------------------------------------------------------------------------------------------------------------------------------------|
| <p>your household compound?</p> <p>କଣ ଆପଣଙ୍କ ଘର ପରିସର ମଧ୍ୟରେ ଏକ ଆବଶ୍ୟକ ଗାଧୁଆଁର ଅଛି କି?</p>                                                                                                                                                                                                                                                                                                                                                                                                                                                    | <p><input type="checkbox"/> 1. Yes ହଁ</p> <p><input type="checkbox"/> 2. No ନା</p>                                                                                                                                                                                                                                                                                                                                                                                                                                                                                                                                                                                                                                                                                                                                                                                                                                                                                                                                                                                                      |
| <p><b>SECTION B: COVID-19 Knowledge, Perceptions, and Actions</b></p> <p><b>Enumerator read:</b> Thank you for your responses so far. Now I'm going to ask you some questions related to coronavirus.</p> <p>ଏମୁନରେଟର ପଢନ୍ତୁ : ବର୍ତ୍ତମାନ ପର୍ଯ୍ୟନ୍ତ ଦେଇଥିବା ଉତ୍ତର ମାନଙ୍କ ପାଇଁ ଧନ୍ୟବାଦ। ବର୍ତ୍ତମାନ, ମୁଁ ଆପଣଙ୍କୁ କରୋନାଭାଇରସ ସହିତ ଜଡ଼ିତ କିଛି ପ୍ରଶ୍ନ ପଚାରିବି।</p>                                                                                                                                                                                   |                                                                                                                                                                                                                                                                                                                                                                                                                                                                                                                                                                                                                                                                                                                                                                                                                                                                                                                                                                                                                                                                                         |
| <p><b>B1. Have you heard of a disease called covid-19, coronavirus, or corona?</b></p> <p>କଣ ଆପଣ କୋଭିଡ-୧୯, କରୋନା-ଭାଇରସ କିମ୍ବା କରୋନା ନାମକ ରୋଗ ବିଷୟରେ ଶୁଣିଛନ୍ତି?</p>                                                                                                                                                                                                                                                                                                                                                                            | <p><input type="checkbox"/> 1. Yes ହଁ</p> <p><input type="checkbox"/> 2. No → <b>If no, explain that this is the disease that has led to the recent lockdowns in India.</b></p> <p>ନା- ଯଦି ନା, ତାହେଲେ ଏହା କୁହନ୍ତୁ କି ଯେ ଏହି ରୋଗ ପାଇଁ ହିଁ ଏବେ ଭାରତରେ ଲକ୍-ଡାଉନ ହୋଇଛି</p>                                                                                                                                                                                                                                                                                                                                                                                                                                                                                                                                                                                                                                                                                                                                                                                                                  |
| <p><b>B2. What are the symptoms of coronavirus?</b></p> <p>କରୋନା ଭାଇରସର ଲକ୍ଷଣ ଗୁଡ଼ିକ କଣ?</p> <p><u>Enumerator notes:</u><br/>Do <b>NOT</b> read response options. Select all that apply.</p> <p>ସମ୍ଭାବ୍ୟ ଉତ୍ତର ଗୁଡ଼ିକ ପଢନ୍ତୁ ନାହିଁ। ଦେଇଥିବା ଉତ୍ତର ଗୁଡ଼ିକ ଟୀକ କରନ୍ତୁ।</p> <p>Probe: Anything else?<br/>ପ୍ରୋବ : ଆଉ କିଛି?</p> <p>If respondent says sick/flu as their response, ask them to specify specific symptoms.</p> <p>ଯଦି ଉତ୍ତରଦାତା ଅସୁସ୍ଥ ଲାଗିବା/ ଅଣ୍ଡା ହେବା ବିଷୟରେ କୁହନ୍ତି, ତାଙ୍କୁ ନିର୍ଦ୍ଦିଷ୍ଟ ଲକ୍ଷଣ ଗୁଡ଼ିକ ବିଷୟରେ କହିବାକୁ କୁହନ୍ତୁ</p> | <p><input type="checkbox"/> 1. No symptoms କିଛି ଲକ୍ଷଣ ନାହିଁ</p> <p><input type="checkbox"/> 2. Fever ଜ୍ୱର</p> <p><input type="checkbox"/> 3. Cough କାଶ</p> <p><input type="checkbox"/> 4. Dry cough ଶୁଖିଲା କାସ</p> <p><input type="checkbox"/> 5. Headache ମୁଣ୍ଡବଥା</p> <p><input type="checkbox"/> 6. Body aches ଶରୀର ବ୍ୟଥା</p> <p><input type="checkbox"/> 7. Difficulty breathing ନିଶ୍ୱାସ ନେବାରେ ଅସୁବିଧା</p> <p><input type="checkbox"/> 8. Chest pain ଛାତି ଯନ୍ତ୍ରଣା</p> <p><input type="checkbox"/> 9. Tiredness ଲାଜି</p> <p><input type="checkbox"/> 10. Diarrhea ଡାଲରିଆ</p> <p><input type="checkbox"/> 11. Chills ଥଣ୍ଡା ଲାଗିବା</p> <p><input type="checkbox"/> 12. Rash କୁଣ୍ଡିଆ</p> <p><input type="checkbox"/> 13. Loss of smell and/or taste ଗନ୍ଧ କିମ୍ବା ସ୍ୱାଦ ବାରିପାରୁନାହାନ୍ତି</p> <p><input type="checkbox"/> 14. Dizziness ମୁଣ୍ଡ ଗୁଲେଇବା</p> <p><input type="checkbox"/> 15. Sneezing ଛିଙ୍କ/ଜିଙ୍କ</p> <p><input type="checkbox"/> 16. Sore throat ଖରାପ ଗଳା</p> <p><input type="checkbox"/> 88. Other ଅନ୍ୟାନ୍ୟ:</p> <p><input type="checkbox"/> 99. Don't know ଜାଣିନାହିଁ</p> |
| <p><b>B3. What causes a person to get sick with coronavirus?</b></p> <p>କେଉଁ କାରଣ ମାନଙ୍କ ପାଇଁ ଜଣାନ୍ତୁ କରୋନା ଭାଇରସ ହୋଇଥାଏ?</p> <p>Enumerator note: Probe for respondent to describe in detail. If the respondent is having trouble answering, ask: "What actions would increase your risk of getting coronavirus? Why?"</p>                                                                                                                                                                                                                    |                                                                                                                                                                                                                                                                                                                                                                                                                                                                                                                                                                                                                                                                                                                                                                                                                                                                                                                                                                                                                                                                                         |

## COVID-19 Mobile Phone Interview – VWSC

|                                                                                                                                                                                                                                                                                                                                                                                                                                                                                                                                                               |                                                                                                                                                                                                                                                                                                                                                                                                                                                         |
|---------------------------------------------------------------------------------------------------------------------------------------------------------------------------------------------------------------------------------------------------------------------------------------------------------------------------------------------------------------------------------------------------------------------------------------------------------------------------------------------------------------------------------------------------------------|---------------------------------------------------------------------------------------------------------------------------------------------------------------------------------------------------------------------------------------------------------------------------------------------------------------------------------------------------------------------------------------------------------------------------------------------------------|
| <p>ଏମ୍ବୁମ୍ବେଟେରଙ୍କ ପାଇଁ ନୋଟ: ଉତ୍ତରଦାତାଙ୍କୁ ବର୍ଣ୍ଣନା କରିବା ପାଇଁ ଅନୁରୋଧ କରନ୍ତୁ। ଯଦି ଉତ୍ତରଦାତାଙ୍କୁ ଉତ୍ତର ଦେବାରେ ଅସୁବିଧା ହେଉଥାଏ, ପଚାରନ୍ତୁ, “କେଉଁ କମ ଆପଣଙ୍କର କରୋନାଭାଇରସ ହେବାର ଆଶଙ୍କାକୁ ବଢେଇଦେଇଥାଏ? କାହିଁକି?”</p>                                                                                                                                                                                                                                                                                                                                                   |                                                                                                                                                                                                                                                                                                                                                                                                                                                         |
| <p><b>B4. Are there any cures or treatments for coronavirus disease?</b><br/>କ’ଣ କରୋନା ଭାଇରସର କିଛି ଉପଶମ କିମ୍ବା ଚିକିତ୍ସା ଅଛି କି?</p> <p>If yes, please describe these cures or treatments.<br/>ଯଦି ହଁ, ଏହି ଉପଶମ କିମ୍ବା ଚିକିତ୍ସା ଗୁଡିକୁ ବର୍ଣ୍ଣନା କରନ୍ତୁ</p> <p>Enumerator note: If the respondent describes their answer, please take notes on their response even if they respond ‘no’ or ‘don’t know’.</p> <p>ଏମ୍ବୁମ୍ବେଟେର ନୋଟ : ଯଦି ଉତ୍ତରଦାତା ତାଙ୍କ ଉତ୍ତରକୁ ବର୍ଣ୍ଣନା କରନ୍ତି, ତାଙ୍କ ଉତ୍ତରକୁ ଚିପନ୍ତୁ ଯଦିଓ ସେମାନେ ‘ନାହିଁ’ କିମ୍ବା ‘ଜଣା ନାହିଁ’ ଉତ୍ତର ଦିଅନ୍ତି।</p> | <div style="margin-bottom: 10px;"> <input type="checkbox"/> 1. Yes ହଁ<br/> <input type="checkbox"/> 2. No ନାହିଁ<br/> <input type="checkbox"/> 99. Don't know ଜଣାନାହିଁ         </div> <p><b><u>Please describe:</u></b><br/><u>ଦୟାକରି ବର୍ଣ୍ଣନା କରନ୍ତୁ</u></p>                                                                                                                                                                                            |
| <p><b>B5. Do you think your personal chance of getting coronavirus is low, medium, high, or do you have no risk at all? Explain why.</b></p> <p>ଆପଣଙ୍କୁ ଲାଗୁଛି କି ଯେ ଆପଣଙ୍କୁ କରୋନାଭାଇରସ ହେବାର ବ୍ୟକ୍ତିଗତ ସମ୍ଭାବନା କମ, ମଧ୍ୟମ, ଅଧିକ ଅଥବା ଆପଣଙ୍କ ପ୍ରତି କିଛି ବି ବିପଦ ନାହିଁ? ବର୍ଣ୍ଣନା କରନ୍ତୁ କାହିଁକି।</p>                                                                                                                                                                                                                                                           | <div style="margin-bottom: 10px;"> <input type="checkbox"/> 1. Low କମ<br/> <input type="checkbox"/> 2. Medium ମାଧ୍ୟମ<br/> <input type="checkbox"/> 3. High ଅଧିକ<br/> <input type="checkbox"/> 4. No risk କିଛି ବିପଦ ନୁହେଁ<br/> <input type="checkbox"/> 99. Don't know ଜଣାନାହିଁ         </div> <p><b><u>Explain why:</u></b> ବର୍ଣ୍ଣନା କରନ୍ତୁ କାହିଁକି</p>                                                                                                 |
| <p><b>B6. In the past 7 days, what actions have you and your family taken to avoid getting coronavirus, if any?</b></p> <p>ଗତ ସାତଦିନ ମଧ୍ୟରେ, ଆପଣ ଓ ଆପଣଙ୍କ ପରିବାରର ସଦସ୍ୟ ମାନେ ନିଜକୁ କରୋନା ଭାଇରସରୁ ଦୂରେଇ ରଖିବାକୁ କଣ ପଦକ୍ଷେପ ନେଇଛନ୍ତି?</p>                                                                                                                                                                                                                                                                                                                       |                                                                                                                                                                                                                                                                                                                                                                                                                                                         |
| <p><b>B7. In the past 7 days, what actions have you and your family taken to avoid getting coronavirus, if any? I am going to read a list of actions. For each one, please tell me yes or no.</b></p> <p>ଗତ ସାତ ଦିନ ମଧ୍ୟରେ, ଆପଣ ଓ ଆପଣଙ୍କ ପରିବାରର ସଦସ୍ୟ</p>                                                                                                                                                                                                                                                                                                    | <div style="margin-bottom: 10px;"> <input type="checkbox"/> 1. Stayed at home as much as possible<br/>ଯେତେ ପାରିଲେ, ଘରେ ରହିଛନ୍ତି         </div> <div style="margin-bottom: 10px;"> <input type="checkbox"/> 2. Did not attend school or work<br/>ସ୍କୁଲ କିମ୍ବା କାମକୁ ଯାଇନାହାନ୍ତି         </div> <div style="margin-bottom: 10px;"> <input type="checkbox"/> 3. Did not attend social gatherings (e.g., weddings, funerals, church, temple)         </div> |

## COVID-19 Mobile Phone Interview – VWSC

|                                                                                                                                                                                                                                                                                                                                                              |                                                                                                                                                                                                                                                                                                                                                                                                                                                                                                                                                                                                                                                                                                                                                                                                                                                                                                                                                                                                                                                                                                                                                                                                                                                                                                                                                                                                                                                                                                                                                                                                                                                                                                                                                                                                                            |
|--------------------------------------------------------------------------------------------------------------------------------------------------------------------------------------------------------------------------------------------------------------------------------------------------------------------------------------------------------------|----------------------------------------------------------------------------------------------------------------------------------------------------------------------------------------------------------------------------------------------------------------------------------------------------------------------------------------------------------------------------------------------------------------------------------------------------------------------------------------------------------------------------------------------------------------------------------------------------------------------------------------------------------------------------------------------------------------------------------------------------------------------------------------------------------------------------------------------------------------------------------------------------------------------------------------------------------------------------------------------------------------------------------------------------------------------------------------------------------------------------------------------------------------------------------------------------------------------------------------------------------------------------------------------------------------------------------------------------------------------------------------------------------------------------------------------------------------------------------------------------------------------------------------------------------------------------------------------------------------------------------------------------------------------------------------------------------------------------------------------------------------------------------------------------------------------------|
| <p>ମାନେ ନିଜକୁ କରୋନାଭାଇରସରୁ ଦୂରେଇ ରଖିବାକୁ କଣ ପଦକ୍ଷେପ ନେଇଛନ୍ତି? ମୁଁ କିଛି ପଦକ୍ଷେପ ପଚାରି ପ୍ରତିଟି ପଦକ୍ଷେପ ପାଇଁ ହଁ କିମ୍ବା ନାହିଁ କୁହନ୍ତୁ।</p> <p><b>Enumerator note:</b> Select each action that the respondent says 'yes' for.</p> <p>ଏମ୍ବୁମ୍ବେଟରଙ୍କ ପାଇଁ ନୋଟ: ସବୁ ପଦକ୍ଷେପ ବାଛନ୍ତୁ, ଯାହାପାଇଁ ଉତ୍ତରଦାତା 'ହଁ' କହିଛନ୍ତି ।</p>                                         | <p style="text-align: right;">ସାମାଜିକ ସମାବେଶକୁ ଯାଇନାହାନ୍ତି (ଉଦାହରଣ : ବିବାହ, ଅତିମ ସଂସ୍କାର, ଗୀର୍ଜାଘର, ମନ୍ଦିର)</p> <p><input type="checkbox"/> 4. Kept a distance from others → What distance? _____ meters<br/>ଅନ୍ୟ ମାନଙ୍କ ଠାରୁ ଦୂରତ୍ୱ ରକ୍ଷା କରିଛନ୍ତି – କେତେ ମିଟର ଦୂରତ୍ୱ</p> <p><input type="checkbox"/> 5. Washed hands/used hand sanitizer more frequently<br/>ହାତ ଧୋଇବା / ସାନିଟାଇଜର ର ବ୍ୟବହାର ବଢ଼େଇ ଦେଇଛନ୍ତି</p> <p><input type="checkbox"/> 6. Wore a (face) mask<br/>ମାସ୍କ ପିନ୍ଧିଛନ୍ତି</p> <p><input type="checkbox"/> 7. Wore gloves (on your hands)<br/>ଗ୍ଲୋବ୍ ପିନ୍ଧିଛନ୍ତି</p> <p><input type="checkbox"/> 8. Tried to stop touching face<br/>ମୁହଁଟିକୁ ନ ଛୁଇଁବାର ଚେଷ୍ଟା କରିଛନ୍ତି</p> <p><input type="checkbox"/> 9. Did not shake hands with others<br/>ଅନ୍ୟ ମାନଙ୍କ ସହିତ ହାତ ମିଶେଇନାହାନ୍ତି</p> <p><input type="checkbox"/> 10. Covered your mouth with elbow when you sneezed or coughed<br/>ଛିଙ୍କିବା କିମ୍ବା କାଶିବା ସମୟରେ ପାଟିକୁ କଣ୍ଠପ୍ରାନ୍ତରେ ଘୋଡ଼ାଇ ଦେଇଛନ୍ତି</p> <p><input type="checkbox"/> 11. Drank local alcohol ଦେଶୀ ମଦ ପିଇଛନ୍ତି</p> <p><input type="checkbox"/> 12. Scrubbed/cleaned surfaces such as door handles, faucets, phone, etc.<br/>କୌଣସି ପୃଷ୍ଠକୁ ଘଷିଛନ୍ତି/ସଫା କରିଛନ୍ତି ଯେପରିକି ଡୋର ହାଣ୍ଡଲ, ଟ୍ୟାପ, ଫୋନ୍ ଇତ୍ୟାଦି</p> <p><input type="checkbox"/> 13. Informed people of illness symptoms<br/>ଲୋକ ମାନଙ୍କୁ ରୋଗର ଲକ୍ଷ୍ୟ ଶୁଣାଇ ଦେଇଛନ୍ତି</p> <p><input type="checkbox"/> 14. Contacted a coronavirus helpline<br/>କୌଣସି କରୋନାଭାଇରସ ହେଲ୍ପଲାଇନ୍ କୁ ଯୋଗାଯୋଗ କରିଛନ୍ତି</p> <p><input type="checkbox"/> 15. Avoided hospitals/clinics<br/>ହସ୍ପିଟାଲ କିମ୍ବା କ୍ଲିନିକକୁ ଏଡେଇଛନ୍ତି</p> <p><input type="checkbox"/> 16. Avoided public transit/traveling<br/>ସର୍ବ ସାଧାରଣ ପରିବହନ/ଭ୍ରମଣକୁ ଏଡେଇଛନ୍ତି</p> <p><input type="checkbox"/> 17. Nothing କିଛି ନୁହେଁ</p> <p><input type="checkbox"/> 88. Other ଅନ୍ୟାନ୍ୟ: _____</p> |
| <p><b>B8.</b> What are some of the challenges you and your family face in being able to stay at home at all times except when you are performing essential activities such as working or buying food?</p> <p>ଖାଦ୍ୟ କିଣିବା କିମ୍ବା କାମ କରିବା ଭଳି ଆବଶ୍ୟକୀୟ କାମ ଗୁଡ଼ିକୁ ଛାଡି ଅନ୍ୟ ସମୟ ଘରେ ରହିବାରେ, ଆପଣ ଓ ଆପଣଙ୍କ ପରିବାର ସଦସ୍ୟ କେଉଁ ଅସୁବିଧାର ସମ୍ମୁଖୀନ ହୁଅନ୍ତି?</p> |                                                                                                                                                                                                                                                                                                                                                                                                                                                                                                                                                                                                                                                                                                                                                                                                                                                                                                                                                                                                                                                                                                                                                                                                                                                                                                                                                                                                                                                                                                                                                                                                                                                                                                                                                                                                                            |
| <p><b>B9.</b> What are some of the challenges you and your family face in being able to maintain 2 meters of distance between other non-family members when you are outside of your house? ଘରଠାରୁ ବାହାରେ ସମସ୍ତ ସମୟ ଅଣ-ପରିବାର ସଦସ୍ୟ ମାନଙ୍କ ଠାରୁ ୨ ମିଟର ଦୂରତ୍ୱ ରକ୍ଷା କରିବା ସମୟରେ ଆପଣ ଓ ଆପଣଙ୍କ ପରିବାର ସଦସ୍ୟ କେଉଁ ଅସୁବିଧାର ସମ୍ମୁଖୀନ ହୁଅନ୍ତି?</p>                 |                                                                                                                                                                                                                                                                                                                                                                                                                                                                                                                                                                                                                                                                                                                                                                                                                                                                                                                                                                                                                                                                                                                                                                                                                                                                                                                                                                                                                                                                                                                                                                                                                                                                                                                                                                                                                            |

## COVID-19 Mobile Phone Interview – VWSC

|                                                                                                                                                                                                                                                                                                                                                                                                                                                                                                                                                                           |                                                                                                                                                                                                                                                                                                                                                                                                                                                                                                                                                                                                                                                                                                                                                                                                     |
|---------------------------------------------------------------------------------------------------------------------------------------------------------------------------------------------------------------------------------------------------------------------------------------------------------------------------------------------------------------------------------------------------------------------------------------------------------------------------------------------------------------------------------------------------------------------------|-----------------------------------------------------------------------------------------------------------------------------------------------------------------------------------------------------------------------------------------------------------------------------------------------------------------------------------------------------------------------------------------------------------------------------------------------------------------------------------------------------------------------------------------------------------------------------------------------------------------------------------------------------------------------------------------------------------------------------------------------------------------------------------------------------|
| <p><b>B10.</b> What are some of the challenges you and your family face in being able to frequently wash your hands with water and soap?</p> <p>ସାବୁନ ଓ ପାଣିରେ ବାରମ୍ବାର ହାତ ଧୋଇବାକୁ ନେଇ ଆପଣ ଓ ଆପଣଙ୍କ ପରିବାର ସଦସ୍ୟ କେଉଁ ଅସୁବିଧାର ସମ୍ମୁଖୀନ ହୁଅନ୍ତି?</p>                                                                                                                                                                                                                                                                                                                     |                                                                                                                                                                                                                                                                                                                                                                                                                                                                                                                                                                                                                                                                                                                                                                                                     |
| <p><b>B11.</b> What types of people are at high risk for getting very seriously sick if they get coronavirus?</p> <p>କେଉଁ ପ୍ରକାର ଲୋକଙ୍କୁ କରୋନାଭାଇରସ ହେଲେ ସେମାନେ ସର୍ବାଧିକ ଅସୁସ୍ଥ ହେବାର ବିପଦ ଅଛି?</p> <p>Enumerator note: Do <b>NOT</b> read response options. Select all that apply.<br/>ଏନୁମରେଟର ନୋଟ: ବିକଳ ଉତ୍ତର ଗୁଡ଼ିକୁ ପଢନ୍ତୁ ନାହିଁ। ଦେଇଥିବା ସମସ୍ତ ଉତ୍ତରକୁ ବାଛନ୍ତୁ।</p>                                                                                                                                                                                                 | <div style="display: flex; flex-direction: column; gap: 5px;"> <div><input type="checkbox"/> 1. Elderly/Over 60 ବୃଦ୍ଧ/60 ରୁ ଊର୍ଦ୍ଧ୍ବ</div> <div><input type="checkbox"/> 2. Men ପୁରୁଷ</div> <div><input type="checkbox"/> 3. Women ମହିଳା</div> <div><input type="checkbox"/> 4. Babies (&lt;1 year) ଛୁଆ (&lt;୧ ବର୍ଷ)</div> <div><input type="checkbox"/> 5. Children ପିଲା</div> <div><input type="checkbox"/> 6. Pregnant women ଗର୍ଭବତୀ ମହିଳା</div> <div><input type="checkbox"/> 7. People who are already sick/weak immune systems<br/>ଯେଉଁ ଲୋକମାନେ ପୂର୍ବରୁ ଅସୁସ୍ଥ/ ଯାହାର ରୋଗପ୍ରତିରୋଧକ ପ୍ରଣାଳୀ ଦୁର୍ବଳ ଅଟେ</div> <div><input type="checkbox"/> 8. Everyone</div> <div><input type="checkbox"/> 88. Other ଅନ୍ୟାନ୍ୟ: _____</div> <div><input type="checkbox"/> 99. Don't know ଜଣା ନାହିଁ</div> </div> |
| <p><b>Enumerator read:</b> I am now going to read a few questions where I ask you to think about a scenario where you or a family member have coronavirus or show symptoms. I want to emphasize to you that this is just an imagined scenario and only for survey purposes.</p> <p>ମୁଁ ବର୍ତ୍ତମାନ କିଛି ପ୍ରଶ୍ନ ପଢିବାକୁ ଯାଉଛି ଯେବେ ମୁଁ ଆପଣଙ୍କୁ ଏକ ପରିସ୍ଥିତି ବିଷୟରେ ଭାବିବାକୁ କହିବି ଯେବେ ଆପଣଙ୍କୁ କିମ୍ବା ଆପଣଙ୍କ ପରିବାରର କେହି ସଦସ୍ୟଙ୍କୁ କରୋନାଭାଇରସ ହୋଇଛି କିମ୍ବା ଲକ୍ଷଣ ଦେଖା ଦେଉଛି। ମୁଁ ଏହା ଜୋର ଦେଇ କହୁଛି କି ଯେ ଏହା ଏକ କଳ୍ପିତ ପରିସ୍ଥିତି ହୁଏ ଏବଂ କେବଳ ସର୍ବେକ୍ଷଣ ପାଇଁ କାରଣ ପାଇଁ।</p> |                                                                                                                                                                                                                                                                                                                                                                                                                                                                                                                                                                                                                                                                                                                                                                                                     |
| <p><b>B12.</b> For survey purposes, if you don't mind, can I please ask how concerned would you be if you or someone in your household got coronavirus? Why?</p> <p>ସର୍ବେକ୍ଷଣ ଉଦ୍ଦେଶ୍ୟ ପାଇଁ, ଯଦି ଆପଣ ଖରାପ ନ ଭାବନ୍ତି, କଣ ମୁଁ ପଚାରିପାରେ ଯେ, ଆପଣ କିମ୍ବା ଆପଣଙ୍କ ଘରେ କାହାକୁ କରୋନାଭାଇରସ ହେଲେ ଆପଣ କେତେ ଚିନ୍ତିତ ହେବେ?</p>                                                                                                                                                                                                                                                         | <div style="display: flex; flex-direction: column; gap: 5px;"> <div><input type="checkbox"/> 1. Not concerned ଚିନ୍ତିତ ନୁହେଁ</div> <div><input type="checkbox"/> 2. Somewhat concerned କିଛିମାତ୍ରାରେ ଚିନ୍ତିତ</div> <div><input type="checkbox"/> 3. Very concerned ବହୁତ ଚିନ୍ତିତ</div> <div><input type="checkbox"/> 99. Don't know ଜଣା ନାହିଁ</div> </div> <p><b><u>Explain why:</u></b> ବର୍ଣ୍ଣନା କରନ୍ତୁ କାହିଁକି</p>                                                                                                                                                                                                                                                                                                                                                                                   |
| <p><b>B13.</b> If you begin exhibiting symptoms, what actions will you take?</p> <p>ଯଦି ଆପଣଙ୍କ ମଧ୍ୟରେ ଲକ୍ଷଣ ଦେଖାଯିବା ଆରମ୍ଭ ହେଉଥାଏ, ଆପଣ କଣ କରିବେ?</p> <p>Enumerator Note: Do <b>NOT</b> read response options. Select all that apply.</p>                                                                                                                                                                                                                                                                                                                                  | <div style="display: flex; flex-direction: column; gap: 5px;"> <div><input type="checkbox"/> 1. Stay at home more ଘରେ ଅଧିକ ରହିବେ</div> <div><input type="checkbox"/> 2. Stop attending school or work<br/>ସ୍କୁଲ କିମ୍ବା କାମକୁ ଯିବା ବନ୍ଦ କରିଦେବେ</div> <div><input type="checkbox"/> 3. Stop attending social gatherings (e.g., weddings, funerals, church, temple)<br/>ସାମାଜିକ ସମାବେଶକୁ ଯିବା ବନ୍ଦ କରିଦେବେ (ଉଦାହରଣ : ବିବାହ, ଅନ୍ତିମ ସଂସ୍କାର, ଗୀର୍ତ୍ତାଘର,</div> </div>                                                                                                                                                                                                                                                                                                                                  |

## COVID-19 Mobile Phone Interview – VWSC

| <p>ଏନ୍ୟୁମରେଟରଙ୍କ ପାଇଁ ନୋଟ: ବିକଳ ଉତ୍ତର ଗୁଡ଼ିକୁ ପଢନ୍ତୁ ନାହିଁ।<br/>ଦେଇଥିବା ସମସ୍ତ ଉତ୍ତରକୁ ବାନ୍ଧନ୍ତୁ</p>                                                                                                                                                                                                                                                                                                                                                                                                                                                                                                                                                                                                                                                                                                                                                                                                                                                                                                                           | <p style="text-align: center;">ମନ୍ଦିର)</p> <p><input type="checkbox"/> 4. Keep a distance of at least 1 meter from others<br/>ଅନ୍ୟ ମାନଙ୍କ ଠାରୁ ଅତି କମରେ ୧ ମିଟର ଦୂରତା ରକ୍ଷା କରିବେ</p> <p><input type="checkbox"/> 5. Keep a distance of at least 2 meters from others<br/>ଅନ୍ୟ ମାନଙ୍କ ଠାରୁ ଅତି କମରେ ୨ ମିଟର ଦୂରତା ରକ୍ଷା କରିବେ</p> <p><input type="checkbox"/> 6. Wash hands more frequently ବାରମ୍ବାର ହାତ ଧୋଇବେ</p> <p><input type="checkbox"/> 7. Start wearing a mask ମାସ୍କ ପିନ୍ଧିବା ଆରମ୍ଭ କରିବେ</p> <p><input type="checkbox"/> 8. Go to health clinic ଚିକିତ୍ସାଳୟକୁ ଯିବେ</p> <p><input type="checkbox"/> 9. Go to be tested for coronavirus କରୋନାଭାଇରସର ପରୀକ୍ଷା ପାଇଁ ଯିବେ</p> <p><input type="checkbox"/> 10. Drink local alcohol ଦେଶୀ ମଦ ପିଇବେ</p> <p><input type="checkbox"/> 11. Inform people of illness symptoms<br/>ଲୋକ ମାନଙ୍କୁ ରୋଗର ଲକ୍ଷ୍ୟ ଶିକ୍ଷାରେ ଜଣାଇବେ</p> <p><input type="checkbox"/> 12. Nothing କିଛି ନୁହେଁ</p> <p><input type="checkbox"/> 88. Other ଅନ୍ୟାନ୍ୟ: _____</p> <p><input type="checkbox"/> 99. Don't know ଜାଣି ନାହିଁ</p>                                                                                                                                                                                                                                                                                                                                                                                                                                                                                                                                                                                                                                                                                                                                                                                                                                                                                                                                                                                                                                                                                                                                                                                                                                                                                                                                                                                                                                                                                                                                                                                                                                                                                                                                                                                                                                                                                                                                                                                                                                                                                                                                                                                                                                                                                                                                                                                                                                                                                                                                                                                                                                                                                                                                                                                                                                                                |                          |                                |  |  |  |              |            |           |                                                  |  |  |  |                                                   |                          |                          |                          |                                                      |                          |                          |                          |                                            |                          |                          |                          |                                 |                          |                          |                          |                                       |                          |                          |                          |                                         |                          |                          |                          |                                                 |                          |                          |                          |                                                      |                          |                          |                          |                                     |                          |                          |                          |                                     |                          |                          |                          |                                                    |                          |                          |                          |                                   |                          |                          |                          |                                     |                          |                          |                          |
|-------------------------------------------------------------------------------------------------------------------------------------------------------------------------------------------------------------------------------------------------------------------------------------------------------------------------------------------------------------------------------------------------------------------------------------------------------------------------------------------------------------------------------------------------------------------------------------------------------------------------------------------------------------------------------------------------------------------------------------------------------------------------------------------------------------------------------------------------------------------------------------------------------------------------------------------------------------------------------------------------------------------------------|-----------------------------------------------------------------------------------------------------------------------------------------------------------------------------------------------------------------------------------------------------------------------------------------------------------------------------------------------------------------------------------------------------------------------------------------------------------------------------------------------------------------------------------------------------------------------------------------------------------------------------------------------------------------------------------------------------------------------------------------------------------------------------------------------------------------------------------------------------------------------------------------------------------------------------------------------------------------------------------------------------------------------------------------------------------------------------------------------------------------------------------------------------------------------------------------------------------------------------------------------------------------------------------------------------------------------------------------------------------------------------------------------------------------------------------------------------------------------------------------------------------------------------------------------------------------------------------------------------------------------------------------------------------------------------------------------------------------------------------------------------------------------------------------------------------------------------------------------------------------------------------------------------------------------------------------------------------------------------------------------------------------------------------------------------------------------------------------------------------------------------------------------------------------------------------------------------------------------------------------------------------------------------------------------------------------------------------------------------------------------------------------------------------------------------------------------------------------------------------------------------------------------------------------------------------------------------------------------------------------------------------------------------------------------------------------------------------------------------------------------------------------------------------------------------------------------------------------------------------------------------------------------------------------------------------------------------------------------------------------------------------------------------------------------------------------------------------------------------------------------------------------------------------------------------------------------------------------------------------------------------------------------------------------------------------------------------------------------------------------------------------------------------------------------------------------------------------------------------------------------------------------------------------------------------------------------------------------------------------------------------------------------------------------------------------------------------------------------------------------------------------------------------------------------------------------------------------------------------------------------------------------------------------------|--------------------------|--------------------------------|--|--|--|--------------|------------|-----------|--------------------------------------------------|--|--|--|---------------------------------------------------|--------------------------|--------------------------|--------------------------|------------------------------------------------------|--------------------------|--------------------------|--------------------------|--------------------------------------------|--------------------------|--------------------------|--------------------------|---------------------------------|--------------------------|--------------------------|--------------------------|---------------------------------------|--------------------------|--------------------------|--------------------------|-----------------------------------------|--------------------------|--------------------------|--------------------------|-------------------------------------------------|--------------------------|--------------------------|--------------------------|------------------------------------------------------|--------------------------|--------------------------|--------------------------|-------------------------------------|--------------------------|--------------------------|--------------------------|-------------------------------------|--------------------------|--------------------------|--------------------------|----------------------------------------------------|--------------------------|--------------------------|--------------------------|-----------------------------------|--------------------------|--------------------------|--------------------------|-------------------------------------|--------------------------|--------------------------|--------------------------|
| <p><b>B14.</b> What has been your <b>main</b> source for information about coronavirus?</p> <p>ଆପଣଙ୍କୁ କରୋନାଭାଇରସ ସହ ଜଡ଼ିତ ମିଳିଥିବା ସୂଚନାର ମୁଖ୍ୟ ଉତ୍ସ କଣ?</p> <p><u>Enumerator notes:</u><br/>For each source recorded, ask:<br/>How much do you trust this source - do you not trust any information from this source, trust some of the information, or trust all of the information?</p> <p>ଏନ୍ୟୁମରେଟର ନୋଟ : ପ୍ରତିଟି ଉତ୍ସ ପାଇଁ, ପଚାରନ୍ତୁ<br/>ଆପଣ ଏହି ଉତ୍ସକୁ କେତେ ବିଶ୍ୱାସ କରନ୍ତି (ଏହି ଉତ୍ସର କୌଣସି ସୂଚନାକୁ ବିଶ୍ୱାସକରନ୍ତି ନାହିଁ, କିଛି ସୂଚନା ଉପରେ ବିଶ୍ୱାସକରନ୍ତି ନା ସବୁ ସୂଚନାକୁ ବିଶ୍ୱାସ କରନ୍ତି?)</p> <p>If the respondent is struggling to understand what “a source” is, you can read a few of the reponse options as examples.<br/>ଯଦି ଉତ୍ତରଦାତାଙ୍କୁ ‘ଉତ୍ସ’ ଶବ୍ଦଟିକୁ ବୁଝିବାରେ ଅସୁବିଧା ହେଉଛି, ଆପଣ କିଛି ବିକଳ ଉଦାହରଣ ସ୍ୱରୂପ ପଢ଼ିପାରିବେ।</p> <p>If the respondent has more than one main source, you can record multiple sources.<br/>ଯଦି ଉତ୍ତରଦାତାଙ୍କ ପାଖରେ ଗୋଟିଏରୁ ଅଧିକ ମୁଖ୍ୟ ଉତ୍ସ ଅଛି, ଆପଣ ଏକାଧିକ ଉତ୍ସକୁ ରେକର୍ଡ କରିପାରିବେ।</p> | <table border="1" style="width: 100%; border-collapse: collapse;"> <thead> <tr> <th style="width: 60%; text-align: center;">Source<br/>ଉତ୍ସ</th> <th colspan="3" style="text-align: center;">Trust Level<br/>ବିଶ୍ୱାସର ମାତ୍ରା</th> </tr> <tr> <th></th> <th style="text-align: center;">Do not trust</th> <th style="text-align: center;">Trust some</th> <th style="text-align: center;">Trust all</th> </tr> </thead> <tbody> <tr> <td><input type="checkbox"/> 1. No sources mentioned</td> <td></td> <td></td> <td></td> </tr> <tr> <td><input type="checkbox"/> 2. Government (National)</td> <td style="text-align: center;"><input type="checkbox"/></td> <td style="text-align: center;"><input type="checkbox"/></td> <td style="text-align: center;"><input type="checkbox"/></td> </tr> <tr> <td><input type="checkbox"/> 3. Government (State/Local)</td> <td style="text-align: center;"><input type="checkbox"/></td> <td style="text-align: center;"><input type="checkbox"/></td> <td style="text-align: center;"><input type="checkbox"/></td> </tr> <tr> <td><input type="checkbox"/> 4. Village Leader</td> <td style="text-align: center;"><input type="checkbox"/></td> <td style="text-align: center;"><input type="checkbox"/></td> <td style="text-align: center;"><input type="checkbox"/></td> </tr> <tr> <td><input type="checkbox"/> 5. NGO</td> <td style="text-align: center;"><input type="checkbox"/></td> <td style="text-align: center;"><input type="checkbox"/></td> <td style="text-align: center;"><input type="checkbox"/></td> </tr> <tr> <td><input type="checkbox"/> 6. Anganwadi</td> <td style="text-align: center;"><input type="checkbox"/></td> <td style="text-align: center;"><input type="checkbox"/></td> <td style="text-align: center;"><input type="checkbox"/></td> </tr> <tr> <td><input type="checkbox"/> 7. ASHA Worker</td> <td style="text-align: center;"><input type="checkbox"/></td> <td style="text-align: center;"><input type="checkbox"/></td> <td style="text-align: center;"><input type="checkbox"/></td> </tr> <tr> <td><input type="checkbox"/> 8. Other health worker</td> <td style="text-align: center;"><input type="checkbox"/></td> <td style="text-align: center;"><input type="checkbox"/></td> <td style="text-align: center;"><input type="checkbox"/></td> </tr> <tr> <td><input type="checkbox"/> 9. Neighbor in your village</td> <td style="text-align: center;"><input type="checkbox"/></td> <td style="text-align: center;"><input type="checkbox"/></td> <td style="text-align: center;"><input type="checkbox"/></td> </tr> <tr> <td><input type="checkbox"/> 10. Friend</td> <td style="text-align: center;"><input type="checkbox"/></td> <td style="text-align: center;"><input type="checkbox"/></td> <td style="text-align: center;"><input type="checkbox"/></td> </tr> <tr> <td><input type="checkbox"/> 11. Family</td> <td style="text-align: center;"><input type="checkbox"/></td> <td style="text-align: center;"><input type="checkbox"/></td> <td style="text-align: center;"><input type="checkbox"/></td> </tr> <tr> <td><input type="checkbox"/> 12. Social media/internet</td> <td style="text-align: center;"><input type="checkbox"/></td> <td style="text-align: center;"><input type="checkbox"/></td> <td style="text-align: center;"><input type="checkbox"/></td> </tr> <tr> <td><input type="checkbox"/> 13. News</td> <td style="text-align: center;"><input type="checkbox"/></td> <td style="text-align: center;"><input type="checkbox"/></td> <td style="text-align: center;"><input type="checkbox"/></td> </tr> <tr> <td><input type="checkbox"/> 14. Other:</td> <td style="text-align: center;"><input type="checkbox"/></td> <td style="text-align: center;"><input type="checkbox"/></td> <td style="text-align: center;"><input type="checkbox"/></td> </tr> </tbody> </table> | Source<br>ଉତ୍ସ           | Trust Level<br>ବିଶ୍ୱାସର ମାତ୍ରା |  |  |  | Do not trust | Trust some | Trust all | <input type="checkbox"/> 1. No sources mentioned |  |  |  | <input type="checkbox"/> 2. Government (National) | <input type="checkbox"/> | <input type="checkbox"/> | <input type="checkbox"/> | <input type="checkbox"/> 3. Government (State/Local) | <input type="checkbox"/> | <input type="checkbox"/> | <input type="checkbox"/> | <input type="checkbox"/> 4. Village Leader | <input type="checkbox"/> | <input type="checkbox"/> | <input type="checkbox"/> | <input type="checkbox"/> 5. NGO | <input type="checkbox"/> | <input type="checkbox"/> | <input type="checkbox"/> | <input type="checkbox"/> 6. Anganwadi | <input type="checkbox"/> | <input type="checkbox"/> | <input type="checkbox"/> | <input type="checkbox"/> 7. ASHA Worker | <input type="checkbox"/> | <input type="checkbox"/> | <input type="checkbox"/> | <input type="checkbox"/> 8. Other health worker | <input type="checkbox"/> | <input type="checkbox"/> | <input type="checkbox"/> | <input type="checkbox"/> 9. Neighbor in your village | <input type="checkbox"/> | <input type="checkbox"/> | <input type="checkbox"/> | <input type="checkbox"/> 10. Friend | <input type="checkbox"/> | <input type="checkbox"/> | <input type="checkbox"/> | <input type="checkbox"/> 11. Family | <input type="checkbox"/> | <input type="checkbox"/> | <input type="checkbox"/> | <input type="checkbox"/> 12. Social media/internet | <input type="checkbox"/> | <input type="checkbox"/> | <input type="checkbox"/> | <input type="checkbox"/> 13. News | <input type="checkbox"/> | <input type="checkbox"/> | <input type="checkbox"/> | <input type="checkbox"/> 14. Other: | <input type="checkbox"/> | <input type="checkbox"/> | <input type="checkbox"/> |
| Source<br>ଉତ୍ସ                                                                                                                                                                                                                                                                                                                                                                                                                                                                                                                                                                                                                                                                                                                                                                                                                                                                                                                                                                                                                | Trust Level<br>ବିଶ୍ୱାସର ମାତ୍ରା                                                                                                                                                                                                                                                                                                                                                                                                                                                                                                                                                                                                                                                                                                                                                                                                                                                                                                                                                                                                                                                                                                                                                                                                                                                                                                                                                                                                                                                                                                                                                                                                                                                                                                                                                                                                                                                                                                                                                                                                                                                                                                                                                                                                                                                                                                                                                                                                                                                                                                                                                                                                                                                                                                                                                                                                                                                                                                                                                                                                                                                                                                                                                                                                                                                                                                                                                                                                                                                                                                                                                                                                                                                                                                                                                                                                                                                                                  |                          |                                |  |  |  |              |            |           |                                                  |  |  |  |                                                   |                          |                          |                          |                                                      |                          |                          |                          |                                            |                          |                          |                          |                                 |                          |                          |                          |                                       |                          |                          |                          |                                         |                          |                          |                          |                                                 |                          |                          |                          |                                                      |                          |                          |                          |                                     |                          |                          |                          |                                     |                          |                          |                          |                                                    |                          |                          |                          |                                   |                          |                          |                          |                                     |                          |                          |                          |
|                                                                                                                                                                                                                                                                                                                                                                                                                                                                                                                                                                                                                                                                                                                                                                                                                                                                                                                                                                                                                               | Do not trust                                                                                                                                                                                                                                                                                                                                                                                                                                                                                                                                                                                                                                                                                                                                                                                                                                                                                                                                                                                                                                                                                                                                                                                                                                                                                                                                                                                                                                                                                                                                                                                                                                                                                                                                                                                                                                                                                                                                                                                                                                                                                                                                                                                                                                                                                                                                                                                                                                                                                                                                                                                                                                                                                                                                                                                                                                                                                                                                                                                                                                                                                                                                                                                                                                                                                                                                                                                                                                                                                                                                                                                                                                                                                                                                                                                                                                                                                                    | Trust some               | Trust all                      |  |  |  |              |            |           |                                                  |  |  |  |                                                   |                          |                          |                          |                                                      |                          |                          |                          |                                            |                          |                          |                          |                                 |                          |                          |                          |                                       |                          |                          |                          |                                         |                          |                          |                          |                                                 |                          |                          |                          |                                                      |                          |                          |                          |                                     |                          |                          |                          |                                     |                          |                          |                          |                                                    |                          |                          |                          |                                   |                          |                          |                          |                                     |                          |                          |                          |
| <input type="checkbox"/> 1. No sources mentioned                                                                                                                                                                                                                                                                                                                                                                                                                                                                                                                                                                                                                                                                                                                                                                                                                                                                                                                                                                              |                                                                                                                                                                                                                                                                                                                                                                                                                                                                                                                                                                                                                                                                                                                                                                                                                                                                                                                                                                                                                                                                                                                                                                                                                                                                                                                                                                                                                                                                                                                                                                                                                                                                                                                                                                                                                                                                                                                                                                                                                                                                                                                                                                                                                                                                                                                                                                                                                                                                                                                                                                                                                                                                                                                                                                                                                                                                                                                                                                                                                                                                                                                                                                                                                                                                                                                                                                                                                                                                                                                                                                                                                                                                                                                                                                                                                                                                                                                 |                          |                                |  |  |  |              |            |           |                                                  |  |  |  |                                                   |                          |                          |                          |                                                      |                          |                          |                          |                                            |                          |                          |                          |                                 |                          |                          |                          |                                       |                          |                          |                          |                                         |                          |                          |                          |                                                 |                          |                          |                          |                                                      |                          |                          |                          |                                     |                          |                          |                          |                                     |                          |                          |                          |                                                    |                          |                          |                          |                                   |                          |                          |                          |                                     |                          |                          |                          |
| <input type="checkbox"/> 2. Government (National)                                                                                                                                                                                                                                                                                                                                                                                                                                                                                                                                                                                                                                                                                                                                                                                                                                                                                                                                                                             | <input type="checkbox"/>                                                                                                                                                                                                                                                                                                                                                                                                                                                                                                                                                                                                                                                                                                                                                                                                                                                                                                                                                                                                                                                                                                                                                                                                                                                                                                                                                                                                                                                                                                                                                                                                                                                                                                                                                                                                                                                                                                                                                                                                                                                                                                                                                                                                                                                                                                                                                                                                                                                                                                                                                                                                                                                                                                                                                                                                                                                                                                                                                                                                                                                                                                                                                                                                                                                                                                                                                                                                                                                                                                                                                                                                                                                                                                                                                                                                                                                                                        | <input type="checkbox"/> | <input type="checkbox"/>       |  |  |  |              |            |           |                                                  |  |  |  |                                                   |                          |                          |                          |                                                      |                          |                          |                          |                                            |                          |                          |                          |                                 |                          |                          |                          |                                       |                          |                          |                          |                                         |                          |                          |                          |                                                 |                          |                          |                          |                                                      |                          |                          |                          |                                     |                          |                          |                          |                                     |                          |                          |                          |                                                    |                          |                          |                          |                                   |                          |                          |                          |                                     |                          |                          |                          |
| <input type="checkbox"/> 3. Government (State/Local)                                                                                                                                                                                                                                                                                                                                                                                                                                                                                                                                                                                                                                                                                                                                                                                                                                                                                                                                                                          | <input type="checkbox"/>                                                                                                                                                                                                                                                                                                                                                                                                                                                                                                                                                                                                                                                                                                                                                                                                                                                                                                                                                                                                                                                                                                                                                                                                                                                                                                                                                                                                                                                                                                                                                                                                                                                                                                                                                                                                                                                                                                                                                                                                                                                                                                                                                                                                                                                                                                                                                                                                                                                                                                                                                                                                                                                                                                                                                                                                                                                                                                                                                                                                                                                                                                                                                                                                                                                                                                                                                                                                                                                                                                                                                                                                                                                                                                                                                                                                                                                                                        | <input type="checkbox"/> | <input type="checkbox"/>       |  |  |  |              |            |           |                                                  |  |  |  |                                                   |                          |                          |                          |                                                      |                          |                          |                          |                                            |                          |                          |                          |                                 |                          |                          |                          |                                       |                          |                          |                          |                                         |                          |                          |                          |                                                 |                          |                          |                          |                                                      |                          |                          |                          |                                     |                          |                          |                          |                                     |                          |                          |                          |                                                    |                          |                          |                          |                                   |                          |                          |                          |                                     |                          |                          |                          |
| <input type="checkbox"/> 4. Village Leader                                                                                                                                                                                                                                                                                                                                                                                                                                                                                                                                                                                                                                                                                                                                                                                                                                                                                                                                                                                    | <input type="checkbox"/>                                                                                                                                                                                                                                                                                                                                                                                                                                                                                                                                                                                                                                                                                                                                                                                                                                                                                                                                                                                                                                                                                                                                                                                                                                                                                                                                                                                                                                                                                                                                                                                                                                                                                                                                                                                                                                                                                                                                                                                                                                                                                                                                                                                                                                                                                                                                                                                                                                                                                                                                                                                                                                                                                                                                                                                                                                                                                                                                                                                                                                                                                                                                                                                                                                                                                                                                                                                                                                                                                                                                                                                                                                                                                                                                                                                                                                                                                        | <input type="checkbox"/> | <input type="checkbox"/>       |  |  |  |              |            |           |                                                  |  |  |  |                                                   |                          |                          |                          |                                                      |                          |                          |                          |                                            |                          |                          |                          |                                 |                          |                          |                          |                                       |                          |                          |                          |                                         |                          |                          |                          |                                                 |                          |                          |                          |                                                      |                          |                          |                          |                                     |                          |                          |                          |                                     |                          |                          |                          |                                                    |                          |                          |                          |                                   |                          |                          |                          |                                     |                          |                          |                          |
| <input type="checkbox"/> 5. NGO                                                                                                                                                                                                                                                                                                                                                                                                                                                                                                                                                                                                                                                                                                                                                                                                                                                                                                                                                                                               | <input type="checkbox"/>                                                                                                                                                                                                                                                                                                                                                                                                                                                                                                                                                                                                                                                                                                                                                                                                                                                                                                                                                                                                                                                                                                                                                                                                                                                                                                                                                                                                                                                                                                                                                                                                                                                                                                                                                                                                                                                                                                                                                                                                                                                                                                                                                                                                                                                                                                                                                                                                                                                                                                                                                                                                                                                                                                                                                                                                                                                                                                                                                                                                                                                                                                                                                                                                                                                                                                                                                                                                                                                                                                                                                                                                                                                                                                                                                                                                                                                                                        | <input type="checkbox"/> | <input type="checkbox"/>       |  |  |  |              |            |           |                                                  |  |  |  |                                                   |                          |                          |                          |                                                      |                          |                          |                          |                                            |                          |                          |                          |                                 |                          |                          |                          |                                       |                          |                          |                          |                                         |                          |                          |                          |                                                 |                          |                          |                          |                                                      |                          |                          |                          |                                     |                          |                          |                          |                                     |                          |                          |                          |                                                    |                          |                          |                          |                                   |                          |                          |                          |                                     |                          |                          |                          |
| <input type="checkbox"/> 6. Anganwadi                                                                                                                                                                                                                                                                                                                                                                                                                                                                                                                                                                                                                                                                                                                                                                                                                                                                                                                                                                                         | <input type="checkbox"/>                                                                                                                                                                                                                                                                                                                                                                                                                                                                                                                                                                                                                                                                                                                                                                                                                                                                                                                                                                                                                                                                                                                                                                                                                                                                                                                                                                                                                                                                                                                                                                                                                                                                                                                                                                                                                                                                                                                                                                                                                                                                                                                                                                                                                                                                                                                                                                                                                                                                                                                                                                                                                                                                                                                                                                                                                                                                                                                                                                                                                                                                                                                                                                                                                                                                                                                                                                                                                                                                                                                                                                                                                                                                                                                                                                                                                                                                                        | <input type="checkbox"/> | <input type="checkbox"/>       |  |  |  |              |            |           |                                                  |  |  |  |                                                   |                          |                          |                          |                                                      |                          |                          |                          |                                            |                          |                          |                          |                                 |                          |                          |                          |                                       |                          |                          |                          |                                         |                          |                          |                          |                                                 |                          |                          |                          |                                                      |                          |                          |                          |                                     |                          |                          |                          |                                     |                          |                          |                          |                                                    |                          |                          |                          |                                   |                          |                          |                          |                                     |                          |                          |                          |
| <input type="checkbox"/> 7. ASHA Worker                                                                                                                                                                                                                                                                                                                                                                                                                                                                                                                                                                                                                                                                                                                                                                                                                                                                                                                                                                                       | <input type="checkbox"/>                                                                                                                                                                                                                                                                                                                                                                                                                                                                                                                                                                                                                                                                                                                                                                                                                                                                                                                                                                                                                                                                                                                                                                                                                                                                                                                                                                                                                                                                                                                                                                                                                                                                                                                                                                                                                                                                                                                                                                                                                                                                                                                                                                                                                                                                                                                                                                                                                                                                                                                                                                                                                                                                                                                                                                                                                                                                                                                                                                                                                                                                                                                                                                                                                                                                                                                                                                                                                                                                                                                                                                                                                                                                                                                                                                                                                                                                                        | <input type="checkbox"/> | <input type="checkbox"/>       |  |  |  |              |            |           |                                                  |  |  |  |                                                   |                          |                          |                          |                                                      |                          |                          |                          |                                            |                          |                          |                          |                                 |                          |                          |                          |                                       |                          |                          |                          |                                         |                          |                          |                          |                                                 |                          |                          |                          |                                                      |                          |                          |                          |                                     |                          |                          |                          |                                     |                          |                          |                          |                                                    |                          |                          |                          |                                   |                          |                          |                          |                                     |                          |                          |                          |
| <input type="checkbox"/> 8. Other health worker                                                                                                                                                                                                                                                                                                                                                                                                                                                                                                                                                                                                                                                                                                                                                                                                                                                                                                                                                                               | <input type="checkbox"/>                                                                                                                                                                                                                                                                                                                                                                                                                                                                                                                                                                                                                                                                                                                                                                                                                                                                                                                                                                                                                                                                                                                                                                                                                                                                                                                                                                                                                                                                                                                                                                                                                                                                                                                                                                                                                                                                                                                                                                                                                                                                                                                                                                                                                                                                                                                                                                                                                                                                                                                                                                                                                                                                                                                                                                                                                                                                                                                                                                                                                                                                                                                                                                                                                                                                                                                                                                                                                                                                                                                                                                                                                                                                                                                                                                                                                                                                                        | <input type="checkbox"/> | <input type="checkbox"/>       |  |  |  |              |            |           |                                                  |  |  |  |                                                   |                          |                          |                          |                                                      |                          |                          |                          |                                            |                          |                          |                          |                                 |                          |                          |                          |                                       |                          |                          |                          |                                         |                          |                          |                          |                                                 |                          |                          |                          |                                                      |                          |                          |                          |                                     |                          |                          |                          |                                     |                          |                          |                          |                                                    |                          |                          |                          |                                   |                          |                          |                          |                                     |                          |                          |                          |
| <input type="checkbox"/> 9. Neighbor in your village                                                                                                                                                                                                                                                                                                                                                                                                                                                                                                                                                                                                                                                                                                                                                                                                                                                                                                                                                                          | <input type="checkbox"/>                                                                                                                                                                                                                                                                                                                                                                                                                                                                                                                                                                                                                                                                                                                                                                                                                                                                                                                                                                                                                                                                                                                                                                                                                                                                                                                                                                                                                                                                                                                                                                                                                                                                                                                                                                                                                                                                                                                                                                                                                                                                                                                                                                                                                                                                                                                                                                                                                                                                                                                                                                                                                                                                                                                                                                                                                                                                                                                                                                                                                                                                                                                                                                                                                                                                                                                                                                                                                                                                                                                                                                                                                                                                                                                                                                                                                                                                                        | <input type="checkbox"/> | <input type="checkbox"/>       |  |  |  |              |            |           |                                                  |  |  |  |                                                   |                          |                          |                          |                                                      |                          |                          |                          |                                            |                          |                          |                          |                                 |                          |                          |                          |                                       |                          |                          |                          |                                         |                          |                          |                          |                                                 |                          |                          |                          |                                                      |                          |                          |                          |                                     |                          |                          |                          |                                     |                          |                          |                          |                                                    |                          |                          |                          |                                   |                          |                          |                          |                                     |                          |                          |                          |
| <input type="checkbox"/> 10. Friend                                                                                                                                                                                                                                                                                                                                                                                                                                                                                                                                                                                                                                                                                                                                                                                                                                                                                                                                                                                           | <input type="checkbox"/>                                                                                                                                                                                                                                                                                                                                                                                                                                                                                                                                                                                                                                                                                                                                                                                                                                                                                                                                                                                                                                                                                                                                                                                                                                                                                                                                                                                                                                                                                                                                                                                                                                                                                                                                                                                                                                                                                                                                                                                                                                                                                                                                                                                                                                                                                                                                                                                                                                                                                                                                                                                                                                                                                                                                                                                                                                                                                                                                                                                                                                                                                                                                                                                                                                                                                                                                                                                                                                                                                                                                                                                                                                                                                                                                                                                                                                                                                        | <input type="checkbox"/> | <input type="checkbox"/>       |  |  |  |              |            |           |                                                  |  |  |  |                                                   |                          |                          |                          |                                                      |                          |                          |                          |                                            |                          |                          |                          |                                 |                          |                          |                          |                                       |                          |                          |                          |                                         |                          |                          |                          |                                                 |                          |                          |                          |                                                      |                          |                          |                          |                                     |                          |                          |                          |                                     |                          |                          |                          |                                                    |                          |                          |                          |                                   |                          |                          |                          |                                     |                          |                          |                          |
| <input type="checkbox"/> 11. Family                                                                                                                                                                                                                                                                                                                                                                                                                                                                                                                                                                                                                                                                                                                                                                                                                                                                                                                                                                                           | <input type="checkbox"/>                                                                                                                                                                                                                                                                                                                                                                                                                                                                                                                                                                                                                                                                                                                                                                                                                                                                                                                                                                                                                                                                                                                                                                                                                                                                                                                                                                                                                                                                                                                                                                                                                                                                                                                                                                                                                                                                                                                                                                                                                                                                                                                                                                                                                                                                                                                                                                                                                                                                                                                                                                                                                                                                                                                                                                                                                                                                                                                                                                                                                                                                                                                                                                                                                                                                                                                                                                                                                                                                                                                                                                                                                                                                                                                                                                                                                                                                                        | <input type="checkbox"/> | <input type="checkbox"/>       |  |  |  |              |            |           |                                                  |  |  |  |                                                   |                          |                          |                          |                                                      |                          |                          |                          |                                            |                          |                          |                          |                                 |                          |                          |                          |                                       |                          |                          |                          |                                         |                          |                          |                          |                                                 |                          |                          |                          |                                                      |                          |                          |                          |                                     |                          |                          |                          |                                     |                          |                          |                          |                                                    |                          |                          |                          |                                   |                          |                          |                          |                                     |                          |                          |                          |
| <input type="checkbox"/> 12. Social media/internet                                                                                                                                                                                                                                                                                                                                                                                                                                                                                                                                                                                                                                                                                                                                                                                                                                                                                                                                                                            | <input type="checkbox"/>                                                                                                                                                                                                                                                                                                                                                                                                                                                                                                                                                                                                                                                                                                                                                                                                                                                                                                                                                                                                                                                                                                                                                                                                                                                                                                                                                                                                                                                                                                                                                                                                                                                                                                                                                                                                                                                                                                                                                                                                                                                                                                                                                                                                                                                                                                                                                                                                                                                                                                                                                                                                                                                                                                                                                                                                                                                                                                                                                                                                                                                                                                                                                                                                                                                                                                                                                                                                                                                                                                                                                                                                                                                                                                                                                                                                                                                                                        | <input type="checkbox"/> | <input type="checkbox"/>       |  |  |  |              |            |           |                                                  |  |  |  |                                                   |                          |                          |                          |                                                      |                          |                          |                          |                                            |                          |                          |                          |                                 |                          |                          |                          |                                       |                          |                          |                          |                                         |                          |                          |                          |                                                 |                          |                          |                          |                                                      |                          |                          |                          |                                     |                          |                          |                          |                                     |                          |                          |                          |                                                    |                          |                          |                          |                                   |                          |                          |                          |                                     |                          |                          |                          |
| <input type="checkbox"/> 13. News                                                                                                                                                                                                                                                                                                                                                                                                                                                                                                                                                                                                                                                                                                                                                                                                                                                                                                                                                                                             | <input type="checkbox"/>                                                                                                                                                                                                                                                                                                                                                                                                                                                                                                                                                                                                                                                                                                                                                                                                                                                                                                                                                                                                                                                                                                                                                                                                                                                                                                                                                                                                                                                                                                                                                                                                                                                                                                                                                                                                                                                                                                                                                                                                                                                                                                                                                                                                                                                                                                                                                                                                                                                                                                                                                                                                                                                                                                                                                                                                                                                                                                                                                                                                                                                                                                                                                                                                                                                                                                                                                                                                                                                                                                                                                                                                                                                                                                                                                                                                                                                                                        | <input type="checkbox"/> | <input type="checkbox"/>       |  |  |  |              |            |           |                                                  |  |  |  |                                                   |                          |                          |                          |                                                      |                          |                          |                          |                                            |                          |                          |                          |                                 |                          |                          |                          |                                       |                          |                          |                          |                                         |                          |                          |                          |                                                 |                          |                          |                          |                                                      |                          |                          |                          |                                     |                          |                          |                          |                                     |                          |                          |                          |                                                    |                          |                          |                          |                                   |                          |                          |                          |                                     |                          |                          |                          |
| <input type="checkbox"/> 14. Other:                                                                                                                                                                                                                                                                                                                                                                                                                                                                                                                                                                                                                                                                                                                                                                                                                                                                                                                                                                                           | <input type="checkbox"/>                                                                                                                                                                                                                                                                                                                                                                                                                                                                                                                                                                                                                                                                                                                                                                                                                                                                                                                                                                                                                                                                                                                                                                                                                                                                                                                                                                                                                                                                                                                                                                                                                                                                                                                                                                                                                                                                                                                                                                                                                                                                                                                                                                                                                                                                                                                                                                                                                                                                                                                                                                                                                                                                                                                                                                                                                                                                                                                                                                                                                                                                                                                                                                                                                                                                                                                                                                                                                                                                                                                                                                                                                                                                                                                                                                                                                                                                                        | <input type="checkbox"/> | <input type="checkbox"/>       |  |  |  |              |            |           |                                                  |  |  |  |                                                   |                          |                          |                          |                                                      |                          |                          |                          |                                            |                          |                          |                          |                                 |                          |                          |                          |                                       |                          |                          |                          |                                         |                          |                          |                          |                                                 |                          |                          |                          |                                                      |                          |                          |                          |                                     |                          |                          |                          |                                     |                          |                          |                          |                                                    |                          |                          |                          |                                   |                          |                          |                          |                                     |                          |                          |                          |
| <p><b>B15.</b> How have you gotten your information from this <b>main</b> source?</p>                                                                                                                                                                                                                                                                                                                                                                                                                                                                                                                                                                                                                                                                                                                                                                                                                                                                                                                                         | <p><input type="checkbox"/> 1. TV ଟିଭି</p>                                                                                                                                                                                                                                                                                                                                                                                                                                                                                                                                                                                                                                                                                                                                                                                                                                                                                                                                                                                                                                                                                                                                                                                                                                                                                                                                                                                                                                                                                                                                                                                                                                                                                                                                                                                                                                                                                                                                                                                                                                                                                                                                                                                                                                                                                                                                                                                                                                                                                                                                                                                                                                                                                                                                                                                                                                                                                                                                                                                                                                                                                                                                                                                                                                                                                                                                                                                                                                                                                                                                                                                                                                                                                                                                                                                                                                                                      |                          |                                |  |  |  |              |            |           |                                                  |  |  |  |                                                   |                          |                          |                          |                                                      |                          |                          |                          |                                            |                          |                          |                          |                                 |                          |                          |                          |                                       |                          |                          |                          |                                         |                          |                          |                          |                                                 |                          |                          |                          |                                                      |                          |                          |                          |                                     |                          |                          |                          |                                     |                          |                          |                          |                                                    |                          |                          |                          |                                   |                          |                          |                          |                                     |                          |                          |                          |

## COVID-19 Mobile Phone Interview – VWSC

|                                                                                                                                                                                                                                                                                                                                                                                                                                                                                                                                                                      |                                                                                                                                                                                                                                                                                                                                                                                                                                                                                                                                                                                                                                                                                                                                                                                                                                                                                                                                                                                                                                                             |
|----------------------------------------------------------------------------------------------------------------------------------------------------------------------------------------------------------------------------------------------------------------------------------------------------------------------------------------------------------------------------------------------------------------------------------------------------------------------------------------------------------------------------------------------------------------------|-------------------------------------------------------------------------------------------------------------------------------------------------------------------------------------------------------------------------------------------------------------------------------------------------------------------------------------------------------------------------------------------------------------------------------------------------------------------------------------------------------------------------------------------------------------------------------------------------------------------------------------------------------------------------------------------------------------------------------------------------------------------------------------------------------------------------------------------------------------------------------------------------------------------------------------------------------------------------------------------------------------------------------------------------------------|
| <p>ଆପଣଙ୍କୁ ନିଜ ମୁଖ୍ୟ ଉତ୍ସର ସୂଚନା କେଉଁଠାରୁ ମିଳିଲା?</p>                                                                                                                                                                                                                                                                                                                                                                                                                                                                                                                | <div style="display: flex; flex-direction: column; gap: 5px;"> <input type="checkbox"/> 2. Radio ରେଡ଼ିଓ             <input type="checkbox"/> 3. Loudspeaker from vehicle ଗାଡ଼ିରେ ଲାଗିଥିବା ସ୍ପିକର             <input type="checkbox"/> 4. Newspaper ଖବରକାଗଜ             <input type="checkbox"/> 5. Phone call/SMS ଫୋନ କଲ/ଏସଏମଏସ             <input type="checkbox"/> 6. In person conversation ବ୍ୟକ୍ତିଗତ କଥାବାର୍ତ୍ତା             <input type="checkbox"/> 7. Internet or phone app ଇଣ୍ଟରନେଟ କିମ୍ବା ଫୋନ ଆପ             <input type="checkbox"/> 88. Other ଅନ୍ୟାନ୍ୟ _____             <input type="checkbox"/> 99. Don't know ଜାଣିନାହିଁ           </div>                                                                                                                                                                                                                                                                                                                                                                                                      |
| <p><b>B16.</b> From what other sources have you received information about coronavirus?<br/>I am going to read a list of sources. For each one, please tell me yes or no.</p> <p>Enumerator note: Read each response option.</p> <p>କରୋନାଭାଇରସ ସହ ଜଡ଼ିତ ସୂଚନା ଆପଣଙ୍କୁ ଅନ୍ୟ କେଉଁ ଉତ୍ସରୁ ମିଳିଛି? ମୁଁ କିଛି ଉତ୍ସର ସୂଚୀ ପଢ଼ିଛି। ପ୍ରତିଟି ପାଇଁ, ଦୟାକରି ହଁ କିମ୍ବା ନାହିଁ କୁହନ୍ତୁ।</p>                                                                                                                                                                                         | <div style="display: flex; flex-direction: column; gap: 5px;"> <input type="checkbox"/> 1. Government (National) କେନ୍ଦ୍ର ସରକାର             <input type="checkbox"/> 2. Government (State/Local) ରାଜ୍ୟ/ସ୍ଥାନୀୟ ସରକାର             <input type="checkbox"/> 3. Village Leader ଗ୍ରାମର ନେତା             <input type="checkbox"/> 4. NGO ସ୍ୱେଚ୍ଛାସେବୀ ସଂଗଠନ             <input type="checkbox"/> 5. Anganwadi ଅଙ୍ଗନବାଡ଼ି             <input type="checkbox"/> 6. ASHA Worker ଆଶା କର୍ମୀ             <input type="checkbox"/> 7. Other health worker ଅନ୍ୟ ସ୍ୱାସ୍ଥ୍ୟ କର୍ମଚାରୀ             <input type="checkbox"/> 8 Neighbor in your village ଆପଣଙ୍କ ଗାଁ ର ପଡୋଶୀ             <input type="checkbox"/> 9. Friend ସାଙ୍ଗ             <input type="checkbox"/> 10. Family ପରିବାର             <input type="checkbox"/> 11. Social media/internet ସାମାଜିକ ଗଣମାଧ୍ୟମ/ଇଣ୍ଟରନେଟ             <input type="checkbox"/> 12. News ନ୍ୟୁଜ             <input type="checkbox"/> 13. No other sources କିଛି ଉତ୍ସ ନାହିଁ             <input type="checkbox"/> 14. Other:           </div> |
| <p><b>SECTION C: COVID-19 Impact on Daily Life and Practices</b></p> <p><b>Enumerator read:</b> Thank you for your responses so far. Now I'm going to ask you some questions about how coronavirus has impacted your daily life.</p> <p>ଏନ୍ୟୁମରେଟର ପଢନ୍ତୁ: ବର୍ତ୍ତମାନ ପର୍ଯ୍ୟନ୍ତ ଦେଇଥିବା ଆପଣଙ୍କ ଉତ୍ତର ପାଇଁ ଧନ୍ୟବାଦ। ମୁଁ ବର୍ତ୍ତମାନ କିଛି ପ୍ରଶ୍ନ କରୋନାଭାଇରସ ଆପଣଙ୍କ ଜୀବନକୁ କିପରି ପ୍ରଭାବିତ କରିଛି, ସେ ବିଷୟରେ ପଚାରିବି</p>                                                                                                                                                     |                                                                                                                                                                                                                                                                                                                                                                                                                                                                                                                                                                                                                                                                                                                                                                                                                                                                                                                                                                                                                                                             |
| <p><b>C1.</b> How has coronavirus or the lockdown changed your daily life? Think about from the time you get up in the morning to the time you go to sleep at night. How is your day different now, if it is different?</p> <p>କରୋନାଭାଇରସ କିମ୍ବା ଲକଡାଉନ ଆପଣଙ୍କ ଦୈନିକ ଜୀବନକୁ କିପରି ବଦଳାଇ ଦେଇଛି? ସକାଳୁ ଉଠିବା ସମୟରୁ ଆରମ୍ଭ କରି ରାତିରେ ଶୋଇବାକୁ ଯିବା ପର୍ଯ୍ୟନ୍ତ ସମୟ ବିଷୟରେ ଭାବନ୍ତୁ। ବର୍ତ୍ତମାନ ଆପଣଙ୍କ ଦିନ ଅଲଗା କିପରି, ଯଦି ଅଲଗା ହୋଇଥାଏ?</p> <p><b>Probes:</b> ଅନୁସନ୍ଧାନ:</p> <ul style="list-style-type: none"> <li>○ Staying at home more? ଘରେ ଅଧିକ ସମୟ ରହୁଛନ୍ତି?</li> </ul> |                                                                                                                                                                                                                                                                                                                                                                                                                                                                                                                                                                                                                                                                                                                                                                                                                                                                                                                                                                                                                                                             |

## COVID-19 Mobile Phone Interview – VWSC

|                                                                                                                                                                                                                                                                                                                                                                                     |                                                                                                                                                                                                                                                                                                                                                                                                                                                                                                                                                                                                                                                                                                                                                                                                                                                                                                                                                                                                                                                                                                                                                                                                                                                                                                                                                                                                                                                        |
|-------------------------------------------------------------------------------------------------------------------------------------------------------------------------------------------------------------------------------------------------------------------------------------------------------------------------------------------------------------------------------------|--------------------------------------------------------------------------------------------------------------------------------------------------------------------------------------------------------------------------------------------------------------------------------------------------------------------------------------------------------------------------------------------------------------------------------------------------------------------------------------------------------------------------------------------------------------------------------------------------------------------------------------------------------------------------------------------------------------------------------------------------------------------------------------------------------------------------------------------------------------------------------------------------------------------------------------------------------------------------------------------------------------------------------------------------------------------------------------------------------------------------------------------------------------------------------------------------------------------------------------------------------------------------------------------------------------------------------------------------------------------------------------------------------------------------------------------------------|
| <ul style="list-style-type: none"> <li>○ More/less workload? ଅଧିକ/କମ କାମ</li> <li>○ More/less free time? ଅଧିକ/କମ ଖାଲି ସମୟ</li> <li>○ Is there anywhere in the village you <i>used</i> to go but no longer go? ଗାଁରେ ଏପରି କିଛି ଜାଗା ଅଛି କି ଯେଉଁଠି ଆପଣ ଯାଉଥିଲେ କିନ୍ତୁ ଆଉ ଯାଉ ନାହାନ୍ତି?</li> </ul>                                                                                     |                                                                                                                                                                                                                                                                                                                                                                                                                                                                                                                                                                                                                                                                                                                                                                                                                                                                                                                                                                                                                                                                                                                                                                                                                                                                                                                                                                                                                                                        |
| <p><b>C2.</b> Has coronavirus or the lockdown changed how you or your family <b>interact with other members of your village</b>? Please explain.</p> <p>କଣ କରୋନାଭାଇରସ କିମ୍ବା ଲକଡାଉନ ଆପଣଙ୍କର କିମ୍ବା ଆପଣଙ୍କ ପରିବାରର ଗ୍ରାମର ଅନ୍ୟ ଲୋକମାନଙ୍କ ସହିତ ମିଳାମିଶାରେ କିଛି ପରିବର୍ତ୍ତନ ଆଣିଛି? ଦୟାକରି ବର୍ଣ୍ଣନା କରନ୍ତୁ।</p>                                                                          | <div> <input type="checkbox"/> 1. Yes ହଁ         <input type="checkbox"/> 2. No ନାହିଁ       </div> <p><b><u>Please explain. ଦୟାକରି ବର୍ଣ୍ଣନା କରନ୍ତୁ।</u></b></p>                                                                                                                                                                                                                                                                                                                                                                                                                                                                                                                                                                                                                                                                                                                                                                                                                                                                                                                                                                                                                                                                                                                                                                                                                                                                                        |
| <p><b>C3.</b> In the past 7 days, did you take any of the following actions to cover your household's basic needs?</p> <p>ଗତ ସାତଦିନ ମଧ୍ୟରେ, ନିଜ ଘରର ସାଧାରଣ ଆବଶ୍ୟକତାକୁ ପୂରଣ କରିବା ପାଇଁ, ଆପଣ ଉକ୍ତ କେଉଁ କେଉଁ ପଦକ୍ଷେପ ନେଇଛନ୍ତି?</p> <p>Enumerator: read all response options.<br/>ଏନୁମରେଟର ନୋଟ : ସମସ୍ତ ବିକଳ ଉତ୍ତରଗୁଡ଼ିକୁ ପଢନ୍ତୁ</p> <p>Record any explanations the respondent gives</p> | <div> <input type="checkbox"/> 1. Use cash savings or bank savings<br/>ସଞ୍ଚିତ ଟଙ୍କା କିମ୍ବା ବ୍ୟାଙ୍କ ଜମାଦାଖି ଖର୍ଚ୍ଚ କରିଛନ୍ତି         <input type="checkbox"/> 2. Borrow money or food from neighbor, friend, or relative ପଡୋଶୀ, ସାଙ୍ଗ କିମ୍ବା ସମ୍ପର୍କୀୟଙ୍କ ଠାରୁ ଟଙ୍କା କିମ୍ବା ଖାଦ୍ୟ ଉଧାର ଆଣିଛନ୍ତି         <input type="checkbox"/> 3. Sell assets ସମ୍ପତ୍ତି ବିକିଛନ୍ତି         <input type="checkbox"/> 4. Rely on Government assistance → <b>Ask follow-up question C3A</b><br/>ସରକାରୀ ସାହାଯ୍ୟ ଉପରେ ନିର୍ଭର କରିଛନ୍ତି         <input type="checkbox"/> 5. Rely on NGO assistance<br/>ଏନଜିଓର ସାହାଯ୍ୟ ଉପରେ ନିର୍ଭର କରିଛନ୍ତି         <input type="checkbox"/> 6. None of the above ଏଥିମଧ୍ୟରୁ କିଛି ନୁହେଁ         <input type="checkbox"/> 7. Other ଅନ୍ୟାନ୍ୟ _____       </div> <p><b><u>Record any explanations the respondent gives for this question: ଉତ୍ତରଦାତା ଦେଉଥିବା ଯେକୌଣସି ବର୍ଣ୍ଣନା କୁ ଟିପନ୍ତୁ :</u></b></p> <p><b><u>If rely on government assistance is yes, ask:</u></b><br/><b><u>ଯଦି ସରକାରୀ ସାହାଯ୍ୟ ଉପରେ ନିର୍ଭର କରୁଛନ୍ତି, ତାହେଲେ ପଚାରନ୍ତୁ :</u></b></p> <p><b>C3A.</b> Which, if any, of the following government schemes have you received benefits from?<br/>ଆପଣ ଉକ୍ତ କେଉଁ ସରକାରୀ ନୀତିରୁ ଲାଭବାନ ହେଇଛନ୍ତି?</p> <p>Enumerator: read all response options.<br/>ଏନୁମରେଟର ଏନୁମରେଟର: ସମସ୍ତ ବିକଳ ଉତ୍ତରଗୁଡ଼ିକୁ ପଢନ୍ତୁ</p> <div> <input type="checkbox"/> 1. National Social Assistance Programme for widows, senior citizens, differently abled       </div> |

## COVID-19 Mobile Phone Interview – VWSC

|                                                                                                                                                                                                                                                                                                                                                                                                                                                                                                      |                                                                                                                                                                                                                                                                                                                                                                                                                                                                                                                                                                                                                                                                                                                                           |
|------------------------------------------------------------------------------------------------------------------------------------------------------------------------------------------------------------------------------------------------------------------------------------------------------------------------------------------------------------------------------------------------------------------------------------------------------------------------------------------------------|-------------------------------------------------------------------------------------------------------------------------------------------------------------------------------------------------------------------------------------------------------------------------------------------------------------------------------------------------------------------------------------------------------------------------------------------------------------------------------------------------------------------------------------------------------------------------------------------------------------------------------------------------------------------------------------------------------------------------------------------|
|                                                                                                                                                                                                                                                                                                                                                                                                                                                                                                      | <p style="text-align: center;">ଭାରତ ସରକାରଙ୍କର ବିଧିବା, ବୃଦ୍ଧ ଓ ବିକଳାଙ୍ଗ ସାମାଜିକ ଭରଣା କାର୍ଯ୍ୟକ୍ରମ</p> <p><input type="checkbox"/> 2. Free ration for BPL cardholders over three months<br/>ବିପିଏଲ କାର୍ଡଧାରୀଙ୍କ ପାଇଁ 3 ମାସର ମାଗଣା ରାସନ</p> <p><input type="checkbox"/> 3. Jan Dhan account deposited with INR 500 for three months<br/>ଜନଧନ ଖାତାରେ ଟିନି ମାସ ପାଇଁ 500 ଟଙ୍କା ଜମା</p> <p><input type="checkbox"/> 4. Farmer accounts deposited with INR 2000<br/>କୃଷକ ମାନଙ୍କ ବ୍ୟାଙ୍କ ଖାତାରେ 2000 ଟଙ୍କା ଜମା</p> <p><input type="checkbox"/> 5. Employment guarantee under National Rural Employment Guarantee Scheme<br/>ଜାତୀୟ ଗ୍ରାମୀଣ କର୍ମନିଯୁକ୍ତି ଯୋଜନା (ନରେଗା) ଦ୍ୱାରା ନିଶ୍ଚିତ ନିଯୁକ୍ତି</p> <p><input type="checkbox"/> 6. None କିଛି ନୁହେଁ</p> |
| <p><b>C4. Have you or any member of your family lost a job or work due to coronavirus or the lockdown?</b><br/>କରୋନାଭାଇରସ ପାଇଁ, କଣ ଆପଣ କିମ୍ବା ଆପଣଙ୍କ ପରିବାରର କେହି ସଦସ୍ୟ ନିଜ ଚାକିରି କିମ୍ବା କାମ ହରେଇଛନ୍ତି କି?</p> <p>If yes, who has lost their job and what was the occupation for the job that was lost?<br/>ଯଦି ହଁ, କିଏ ନିଜ ଚାକିରି ହରେଇଛନ୍ତି ଓ ତାଙ୍କର ବୃତ୍ତି କଣ ଥିଲା?</p>                                                                                                                           | <p><input type="checkbox"/> 1. Yes ହଁ<br/><input type="checkbox"/> 2. No ନାହିଁ</p> <p><b><u>If yes, record relationship and occupation:</u></b><br/>ଯଦି ହଁ, ସମ୍ପର୍କ ଓ ବୃତ୍ତି ନୋଟ କରନ୍ତୁ:</p>                                                                                                                                                                                                                                                                                                                                                                                                                                                                                                                                              |
| <p><b>C5. In the past 7 days, have you experienced any difficulties in getting the material you use to cook with (such as wood, gas, etc.) as a result of coronavirus or the lockdown?</b></p> <p>ଗତ ସାତ ଦିନ ମଧ୍ୟରେ, କରୋନା ଭାଇରସ ପାଇଁ, ଆପଣଙ୍କୁ ରାନ୍ଧିବାରେ ଆବଶ୍ୟକ ହେଉଥିବା କିଛି ସାମଗ୍ରୀ (ଯେପରିକି କାଠ, ଗ୍ୟାସ ଇତ୍ୟାଦି) ମିଳିବାରେ କିଛି ଅସୁବିଧା ହୋଇଛି କି?</p> <p>If yes, what type of material and please describe difficulty. ଯଦି ହଁ, କେଉଁ କି ପ୍ରକାର ବସ୍ତୁ ଓ ଦୟାକରି ବର୍ଣ୍ଣନା କରନ୍ତୁ କି ଅସୁବିଧା ହୋଇଛି ?</p> | <p><input type="checkbox"/> 1. Yes ହଁ<br/><input type="checkbox"/> 2. No ନାହିଁ</p> <p><b><u>If yes, what type of material and please describe difficulty:</u></b><br/>ଯଦି ହଁ, ଏହା କି ପ୍ରକାର ବସ୍ତୁ ଓ ଦୟାକରି ବର୍ଣ୍ଣନା କରନ୍ତୁ କି ଅସୁବିଧା ହୋଇଛି ?</p>                                                                                                                                                                                                                                                                                                                                                                                                                                                                                         |
| <p><b>C6. Has coronavirus or the lockdown changed the <b>types or quantity of food</b> your family eats daily? If yes, describe how this has changed.</b></p> <p>କଣ କରୋନାଭାଇରସ କିମ୍ବା ଲକଡାଉନ ଆପଣଙ୍କ ପରିବାରର ର ଖାଇବାର ପରିମାଣ କିମ୍ବା ପ୍ରକାରରେ କିଛି ପରିବର୍ତ୍ତନ ଆଣିଛି? ଯଦି ହଁ, ବର୍ଣ୍ଣନା କରନ୍ତୁ କି ଏହା କି ପରିବର୍ତ୍ତନ ଆଣିଛି।</p>                                                                                                                                                                           | <p><b>Change in <b>types of food</b>?</b> ଖାଦ୍ୟର ପ୍ରକାରରେ ପରିବର୍ତ୍ତନ</p> <p><input type="checkbox"/> 1. Yes ହଁ<br/><input type="checkbox"/> 2. No ନାହିଁ</p> <p><b>Change in <b>quantity of food</b>?</b> ଖାଦ୍ୟର ପରିମାଣରେ ପରିବର୍ତ୍ତନ</p> <p><input type="checkbox"/> 1. Yes ହଁ – Increase<br/><input type="checkbox"/> 2. Yes ହଁ - Decrease<br/><input type="checkbox"/> 3. No ନାହିଁ</p> <p><b><u>If yes, describe:</u></b> ଯଦି ହଁ, ବର୍ଣ୍ଣନା କରନ୍ତୁ</p>                                                                                                                                                                                                                                                                                    |



## COVID-19 Mobile Phone Interview – VWSC

|                                                                                                                                                                                                                                                                                                                                                                                                                                                                                                                                                                                        |                                                                                                                                                                                                                                                                                                                                                  |
|----------------------------------------------------------------------------------------------------------------------------------------------------------------------------------------------------------------------------------------------------------------------------------------------------------------------------------------------------------------------------------------------------------------------------------------------------------------------------------------------------------------------------------------------------------------------------------------|--------------------------------------------------------------------------------------------------------------------------------------------------------------------------------------------------------------------------------------------------------------------------------------------------------------------------------------------------|
|                                                                                                                                                                                                                                                                                                                                                                                                                                                                                                                                                                                        |                                                                                                                                                                                                                                                                                                                                                  |
| <p><b>C7.</b> Are the number of people currently staying in your house more, less, or the same as the number of people that were staying in your house before coronavirus and the lockdown started?</p> <p>ଆପଣଙ୍କ ଘରେ ବର୍ତ୍ତମାନ ରହୁଥିବା ଲୋକଙ୍କ ସଂଖ୍ୟା କରୋନାଭାଇରସ ଏବଂ ଲକଡାଉନ ଆରମ୍ଭ ହେବ ପୂର୍ବରୁ ଘରେ ରହୁଥିବା ଲୋକଙ୍କ ସଂଖ୍ୟା ଠାରୁ ଅଧିକ, କମ ନା ସମାନ?</p>                                                                                                                                                                                                                                     | <p><input type="checkbox"/> 1. Less କମ</p> <p><input type="checkbox"/> 2. The same ସମାନ</p> <p><input type="checkbox"/> 3. More ଅଧିକ</p>                                                                                                                                                                                                         |
| <p><b>C8.</b> The last time you defecated, did you defecate in the open or use the latrine?</p> <p>କଣ ଶେଷ ଥର ଯେବେ ଆପଣ ଝାଡ଼ା ଯାଇଥିଲେ, ତେବେ ଆପଣ ଖୋଲା ରେ ଝାଡ଼ା ଯାଇଥିଲେ ନା ପାଇଖାନା ବ୍ୟବହାର କରିଥିଲେ?</p>                                                                                                                                                                                                                                                                                                                                                                                    | <p><input type="checkbox"/> 1. Open ଖୋଲା ରେ</p> <p><input type="checkbox"/> 2. Latrine ପାଇଖାନା ରେ</p> <p><input type="checkbox"/> 3. Somewhere else (not open field or latrine) ଅଲଗା କେଉଁଠି (ଖୋଲା ପଡିଆ ନୁହେଁ କିମ୍ବା ପାଇଖାନା ନୁହେଁ)</p> <p><input type="checkbox"/> 99. Don't know ଜାଣିନାହିଁ</p>                                                  |
| <p><b>C9.</b> Has coronavirus or the lockdown changed the <b>defecation location of you or any family members</b>? Please explain.</p> <p>କଣ କରୋନାଭାଇରସ କିମ୍ବା ଲକଡାଉନ ଆପଣ କିମ୍ବା ଆପଣଙ୍କ କେହି ପରିବାର ସଦସ୍ୟଙ୍କ ଝାଡ଼ା ଯିବା ଜାଗାକୁ ବଦଳାଇଛି କି? ଦୟାକରି ବର୍ଣ୍ଣନା କରନ୍ତୁ</p> <p><b>Probe:</b> Have there been any changes for <b>elderly adults</b> in your household?<br/>Have there been any changes for <b>young children</b> in your household?</p> <p>ଆପଣଙ୍କ ଘରର ବୃଦ୍ଧ ବ୍ୟକ୍ତିଙ୍କ କ୍ଷେତ୍ରରେ କିଛି ପରିବର୍ତ୍ତନ ଆସିଛି କି?<br/>ଆପଣଙ୍କ ଘରର ଛୋଟ ପିଲାଙ୍କ କ୍ଷେତ୍ରରେ କିଛି ପରିବର୍ତ୍ତନ ଆସିଛି କି?</p> | <p><input type="checkbox"/> 1. Yes ହଁ</p> <p><input type="checkbox"/> 2. No ନାହିଁ</p> <p><b><u>Please explain. ବର୍ଣ୍ଣନା କରନ୍ତୁ</u></b></p>                                                                                                                                                                                                       |
| <p><b>C10.</b> Due to coronavirus or the lockdown, do you think people in this village are defecating in the open more, defecating in a latrine more, or there has been no change in where people defecate? Explain why.</p> <p>ଆପଣ ଭାବୁଛନ୍ତି କି ଯେ, କରୋନାଭାଇରସ କିମ୍ବା ଲକଡାଉନ ପାଇଁ ଆପଣଙ୍କ ଗ୍ରାମର ଲୋକମାନେ, ଖୋଲାରେ ଅଧିକ ଝାଡ଼ା ଯାଉଛନ୍ତି, ଲାଟ୍ରିନ୍‌ର ରେ ଅଧିକ ଝାଡ଼ା ଯାଉଛନ୍ତି ନା ଲୋକ ଝାଡ଼ା କରୁଥିବା ଜାଗାରେ କୌଣସି ପରିବର୍ତ୍ତନ ଆସିନାହିଁ? ବର୍ଣ୍ଣନା କରନ୍ତୁ କଣ ପାଇଁ।</p>                                                                                                                            | <p><input type="checkbox"/> 1. More open defecation ଖୋଲାରେ ଝାଡ଼ା ଯିବା ବଢିଛି</p> <p><input type="checkbox"/> 2. More latrine use ଲାଟ୍ରିନ୍ ବ୍ୟବହାର ବଢିଛି</p> <p><input type="checkbox"/> 3. No change କିଛି ପରିବର୍ତ୍ତନ ନୁହେଁ</p> <p><input type="checkbox"/> 99. Don't know ଜାଣିନାହିଁ</p> <p><b><u>Explain why: ବର୍ଣ୍ଣନା କରନ୍ତୁ କାହିଁକି</u></b></p> |
| <p><b>C11.</b> Has coronavirus or the lockdown changed your <b>handwashing practices</b>? Please explain.</p>                                                                                                                                                                                                                                                                                                                                                                                                                                                                          | <p><input type="checkbox"/> 1. Yes ହଁ</p> <p><input type="checkbox"/> 2. No ନାହିଁ</p>                                                                                                                                                                                                                                                            |

## COVID-19 Mobile Phone Interview – VWSC

|                                                                                                                                                                                                                                                                                                                                                                                                                                                                         |                                                                                                                                                                                                                                                                                                                                                                                                                                                                                                                                                                                                                                                                                                             |
|-------------------------------------------------------------------------------------------------------------------------------------------------------------------------------------------------------------------------------------------------------------------------------------------------------------------------------------------------------------------------------------------------------------------------------------------------------------------------|-------------------------------------------------------------------------------------------------------------------------------------------------------------------------------------------------------------------------------------------------------------------------------------------------------------------------------------------------------------------------------------------------------------------------------------------------------------------------------------------------------------------------------------------------------------------------------------------------------------------------------------------------------------------------------------------------------------|
| <p>କଣ କରୋନାଭାଇରସ କିମ୍ବା ଲକଡାଉନ ଆପଣଙ୍କ ହାତଧୁଆ ପ୍ରକ୍ରିୟାକୁ ବଦଳେଇଛି? ଦୟାକରି ବର୍ଣ୍ଣନା କରନ୍ତୁ।</p> <p><b>Probes:</b> Has there been any change in <b>how often</b> you wash your hands?</p> <p>କଣ ଆପଣ ପ୍ରାୟତଃ କେତେଥର ହାତ ଧୁଅନ୍ତି, ସେଥିରେ କିଛି ପରିବର୍ତ୍ତନ ଆସିଛି କି ?</p> <p>Has there been any change in <b>how much soap or water you use</b> to wash your hands?</p> <p>କଣ ଆପଣ ପ୍ରାୟତଃ କେତେ ପରିମାଣର ସାବୁନ କିମ୍ବା ପାଣି ବ୍ୟବହାର କରନ୍ତି, ସେଥିରେ କିଛି ପରିବର୍ତ୍ତନ ଆସିଛି କି ?</p> | <p><b><u>Please explain.</u></b> ଦୟାକରି ବର୍ଣ୍ଣନା କରନ୍ତୁ</p>                                                                                                                                                                                                                                                                                                                                                                                                                                                                                                                                                                                                                                                 |
| <p><b>C12.</b> In the past 7 days, have you had any difficulties with getting the water that you need for your household? Please explain.</p> <p>କରୋନାଭାଇରସ କିମ୍ବା ଲକଡାଉନ ପାଇଁ ଗତ ସାତ ଦିନ ମଧ୍ୟରେ, କଣ ଆପଣଙ୍କୁ ନିଜ ଘରର ଆବଶ୍ୟକତା ପାଇଁ ଦରକାର ହେଉଥିବା ପାଣି ମିଳିବାରେ କିଛି ଅସୁବିଧା ହେଇଛି କି ?</p>                                                                                                                                                                              | <p><input type="checkbox"/> 1. Yes ହଁ</p> <p><input type="checkbox"/> 2. No ନାହିଁ</p> <p><b><u>Please explain.</u></b> ଦୟାକରି ବର୍ଣ୍ଣନା କରନ୍ତୁ</p>                                                                                                                                                                                                                                                                                                                                                                                                                                                                                                                                                           |
| <p><b>C13.</b> Has coronavirus or the lockdown changed your <b>drinking water practices</b> such as where you get your water, how you store it, and whether or not you clean/treat the water? Please explain.</p> <p>କଣ କରୋନାଭାଇରସ କିମ୍ବା ଲକଡାଉନ ଆପଣଙ୍କ ପାଣି ପିଇବା ସହିତ ଜଡ଼ିତ ପ୍ରକ୍ରିୟା ମାନଙ୍କୁ ବଦଳେଇଛି କି, ଯେପରିକି ଆପଣ ପାଣି କେଉଁଠାରୁ ଆଣନ୍ତି, ତାକୁ କିପରି ରଖନ୍ତି କିମ୍ବା କିପରି ପରିଷ୍କାର କରନ୍ତି? ଦୟାକରି ବର୍ଣ୍ଣନା କରନ୍ତୁ।</p>                                               | <p>Change in <b>where you get</b> your drinking water?<br/>ଆପଣ ପିଇବା ପାଣି ଆଣୁଥିବା ସ୍ଥାନରେ ପରିବର୍ତ୍ତନ?</p> <p><input type="checkbox"/> 1. Yes ହଁ</p> <p><input type="checkbox"/> 2. No ନାହିଁ</p> <p>Change in <b>how you store</b> your drinking water?<br/>ଆପଣ କିପରି ପିଇବା ପାଣିକୁ ରଖନ୍ତି, ସେଥିରେ ପରିବର୍ତ୍ତନ?</p> <p><input type="checkbox"/> 1. Yes ହଁ</p> <p><input type="checkbox"/> 2. No ନାହିଁ</p> <p>Change in whether or not you <b>clean/treat</b> your drinking water?<br/>ଆପଣ ନିଜ ପିଇବା ପାଣିକୁ କିପରି ସଫା/ପରିଷ୍କାର କରନ୍ତି, ସେଥିରେ ପରିବର୍ତ୍ତନ?</p> <p><input type="checkbox"/> 1. Yes ହଁ</p> <p><input type="checkbox"/> 2. No ନାହିଁ</p> <p><b><u>Please explain.</u></b> ଦୟାକରି ବର୍ଣ୍ଣନା କରନ୍ତୁ</p> |

## COVID-19 Mobile Phone Interview – VWSC

|                                                                                                                                                                                                                                                                                                                                                                                                                                                                                                                                                                                                                                                |                                                                                                                                                                                                                                                                                                                                                                                                                                                                                                                                                                                                                                                                                                                                                                                                                                                                                                                                                                                                                                                                                                                                                                                                                                                                                                                                                                                                                                                                                             |
|------------------------------------------------------------------------------------------------------------------------------------------------------------------------------------------------------------------------------------------------------------------------------------------------------------------------------------------------------------------------------------------------------------------------------------------------------------------------------------------------------------------------------------------------------------------------------------------------------------------------------------------------|---------------------------------------------------------------------------------------------------------------------------------------------------------------------------------------------------------------------------------------------------------------------------------------------------------------------------------------------------------------------------------------------------------------------------------------------------------------------------------------------------------------------------------------------------------------------------------------------------------------------------------------------------------------------------------------------------------------------------------------------------------------------------------------------------------------------------------------------------------------------------------------------------------------------------------------------------------------------------------------------------------------------------------------------------------------------------------------------------------------------------------------------------------------------------------------------------------------------------------------------------------------------------------------------------------------------------------------------------------------------------------------------------------------------------------------------------------------------------------------------|
| <p><b>C14.</b> Has coronavirus or the lockdown changed your <b>household cleaning practices</b>? Please explain.</p> <p>କଣ କରୋନାଭାଇରସ କିମ୍ବା ଲକଡାଉନ ଆପଣଙ୍କ ଘର ସଫା କରିବା ପ୍ରକ୍ରିୟାକୁ ବଦଳାଇଛି? ଦୟାକରି ବର୍ଣ୍ଣନା କରନ୍ତୁ</p> <p><b>Probes:</b> Has there been any change in <b>how often</b> you clean your home?</p> <p>କଣ ଆପଣ ପ୍ରାୟତଃ କେତେଥର ଘର ସଫା କରନ୍ତି, ସେଥିରେ କିଛି ପରିବର୍ତ୍ତନ ଆସିଛି କି ?</p> <p>Has there been any change in <b>how much detergent/disinfectant or water you use</b> to clean your home?</p> <p>କଣ ଆପଣ ଘର ସଫା କରିବା ପାଇଁ ପ୍ରାୟତଃ ଯେତେ ଲୁଗାଧୁଆ ପାଉଁଶ/ ଫିନାଇଲ କିମ୍ବା ପାଣି ବ୍ୟବହାର କରନ୍ତି, ସେଥିରେ କିଛି ପରିବର୍ତ୍ତନ ହେଇଛି କି?</p> | <div style="margin-bottom: 10px;"> <input type="checkbox"/> 1. Yes ହଁ<br/> <input type="checkbox"/> 2. No ନାହିଁ         </div> <p><b><u>Please explain. ଦୟାକରି ବର୍ଣ୍ଣନା କରନ୍ତୁ</u></b></p>                                                                                                                                                                                                                                                                                                                                                                                                                                                                                                                                                                                                                                                                                                                                                                                                                                                                                                                                                                                                                                                                                                                                                                                                                                                                                                  |
| <p><b>C15.</b> Do you currently have soap or detergent in your household?</p> <p>ଆପଣଙ୍କ ଗହରେ ବର୍ତ୍ତମାନ ସାବୁନ କିମ୍ବା ଲୁଗାଧୁଆ ପାଉଁଶ ଅଛି କି?</p>                                                                                                                                                                                                                                                                                                                                                                                                                                                                                                  | <div style="margin-bottom: 10px;"> <input type="checkbox"/> 1. Yes ହଁ<br/> <input type="checkbox"/> 2. No ନାହିଁ → <b>Ask followup question C15A</b><br/> <input type="checkbox"/> 99. Don't know ଜାଣି ନାହିଁ         </div> <p><b><u>If answered no, ask: ଯଦି ଉତ୍ତରରେ 'ନାହିଁ' କୁହନ୍ତି, ତା'ହେଲେ ପଚାରନ୍ତୁ :</u></b></p> <p>C15A. The last time you needed to purchase soap for your household, did you experience any of the following</p> <p>ଶେଷଥର ପାଇଁ, ଯେବେ ଆପଣ ନିଜ ଘର ପାଇଁ ସାବୁନ କିଣିବାକୁ ଭାବିଲେ, କଣ ଆପଣ ଉକ୍ତ ଅନୁଭବ କରିଛନ୍ତି କି?</p> <p>Enumerator: read all response options. Record any explanations the respondent gives.</p> <p>ଏନୁମରେଟର ନୋଟ : ସମସ୍ତ ବିକଳ ଉତ୍ତରଗୁଡ଼ିକୁ ପଢନ୍ତୁ । ଉତ୍ତରଦାତା ଦେଇଥିବା ଯେକୌଣସି ବର୍ଣ୍ଣନା କୁ ଟିପନ୍ତୁ</p> <div style="margin-top: 10px;"> <input type="checkbox"/> 1. Difficulties in going to obtain <b>soap</b> due to mobility restrictions imposed by government<br/> ସରକାରଙ୍କ ପ୍ରତିବନ୍ଧକ ମାନଙ୍କ ପାଇଁ ଦୋକାନକୁ ସାବୁନ କିଣିବାକୁ ଯିବାରେ ଅସୁବିଧା ହେଉଛି         </div> <div style="margin-top: 10px;"> <input type="checkbox"/> 2. Unable to buy the amount of <b>soap</b> we usually buy because the household income has dropped<br/> ଘରର ଆୟ କମିଯିବା ଯୋଗୁଁ ଆମେ ସାଧାରଣତଃ ଯେତେ ସାବୁନ କିଣୁ, ତାହା କିଣିପାରୁନାହିଁ         </div> <div style="margin-top: 10px;"> <input type="checkbox"/> 3. Unable to buy the amount of <b>soap</b> we usually buy because of limited supply<br/> ସୀମିତ ଯୋଗାଣ ଯୋଗୁଁ ଆମେ ସାଧାରଣତଃ ଯେତେ ସାବୁନ କିଣୁ, ତାହା କିଣିପାରୁନାହିଁ         </div> |

## COVID-19 Mobile Phone Interview – VWSC

|                                                                                                                                                                                                                                                                                                                                                                 |                                                                                                                                                                                                                                                                                                                                                                                                                                                                                                                                                                                                                                                                               |
|-----------------------------------------------------------------------------------------------------------------------------------------------------------------------------------------------------------------------------------------------------------------------------------------------------------------------------------------------------------------|-------------------------------------------------------------------------------------------------------------------------------------------------------------------------------------------------------------------------------------------------------------------------------------------------------------------------------------------------------------------------------------------------------------------------------------------------------------------------------------------------------------------------------------------------------------------------------------------------------------------------------------------------------------------------------|
|                                                                                                                                                                                                                                                                                                                                                                 | <input type="checkbox"/> 4. None of the above ଏଥିମଧ୍ୟରୁ କିଛି ନୁହେଁ<br><br><b><u>Record any explanations the respondent gives for this question:</u></b><br>ଏହି ପ୍ରଶ୍ନ ପାଇଁ ଉତ୍ତରଦାତା ଦେଇଥିବା ଯେକୌଣସି ବର୍ଣ୍ଣନା କୁ ଟିପନ୍ତୁ।                                                                                                                                                                                                                                                                                                                                                                                                                                                     |
| <b>SECTION D: Household Information</b><br><br><b>Enumerator read:</b> Thank you for your responses about coronavirus. Now I'm going to ask you some questions about your household. This is the last section of the survey!<br><br>କରୋନାଭାଇରସ୍ ଉପରେ ଆପଣଙ୍କ ଉତ୍ତର ପାଇଁ ଧନ୍ୟବାଦ। ମୁଁ ବର୍ତ୍ତମାନ ଆପଣଙ୍କୁ କିଛି ପ୍ରଶ୍ନ ନିଜ ଘର ବିଷୟରେ ପଚାରିବି। ଏହା ସର୍ବେକ୍ଷର ଶେଷ ଭାଗ। |                                                                                                                                                                                                                                                                                                                                                                                                                                                                                                                                                                                                                                                                               |
| <b>D1. What is the highest level of education that you have had?</b><br><br>ଆପଣ ସର୍ବୋଚ୍ଚ କେତେ ପାଠ ପଢ଼ିଛନ୍ତି?                                                                                                                                                                                                                                                    | <input type="checkbox"/> 1. No formal schooling ସ୍କୁଲ ଯାଇନାହାନ୍ତି<br><input type="checkbox"/> 2. Some primary education କିଛି ପ୍ରାଥମିକ ପାଠ<br><input type="checkbox"/> 3. Completed primary education ପ୍ରାଥମିକ ପାଠ ଶେଷ<br><input type="checkbox"/> 4. Some secondary school କିଛି ଟା ସେକେଣ୍ଡରୀ ପାଠ<br><input type="checkbox"/> 5. Matriculation (10 <sup>th</sup> class completed) ମେଟ୍ରିକୁଲେଶନ<br><input type="checkbox"/> 6. Completed secondary school କିଛି ଟା ସେକେଣ୍ଡରୀ ପାଠ ଶେଷ<br><input type="checkbox"/> 7. Some college କିଛି କଲେଜ<br><input type="checkbox"/> 8. Completed college/university କଲେଜ/ୟୁନିଭରସିଟି ଶେଷ<br><input type="checkbox"/> 99. Don't know ଜାଣି ନାହିଁ |
| <b>D2. What is your occupation?</b><br><br>ଆପଣଙ୍କ ବୃତ୍ତି କଣ ?                                                                                                                                                                                                                                                                                                   | <input type="checkbox"/> 1. Unemployed (no work that earns money)<br>ବେରୋଜଗାର(ରୋଜଗାର କରିଲା ଭଳିଆ କିଛି କାମ କରନ୍ତିନାହିଁ)<br><input type="checkbox"/> 2. Self-Employed (Work in home: agriculture, potter, etc.)<br>ନିଜସ୍ବ ରୋଜଗାର(ଯେମିତିକି- ଚାଷ, କୁମ୍ଭାର, ଅନ୍ୟାନ୍ୟ)<br><input type="checkbox"/> 3. Employed (Work outside the home: office, labourer, factory, etc.)<br>ଚାକିରି(ଘରଠାରୁ ବାହାରେ କାମ କରନ୍ତି : ଉଦାହରଣ –ଅଫିସ୍, ଫ୍ୟାକ୍ଟ୍ରି, ଅନ୍ୟାନ୍ୟ)<br><input type="checkbox"/> 4. Student ଛାତ୍ର                                                                                                                                                                                       |
| <b>D3. What is the caste or tribe of the household?</b><br>ଆପଣଙ୍କର କେଉଁ - *ଜାତି ବା ଜନଜାତି* ?<br><br>Enumerator note: Read response options<br>ଏମ୍ବୁମ୍ବରେଟର ନୋଟ : ଉତ୍ତର ଅପସନ୍ନ ଗୁଡ଼ିକୁ ପଢନ୍ତୁ ।                                                                                                                                                                  | <input type="checkbox"/> 1. Brahmin ବ୍ରାହ୍ମଣ<br><input type="checkbox"/> 2. General ସାଧାରଣ<br><input type="checkbox"/> 3. Scheduled caste ଅନୁସୂଚିତ ଜାତି<br><input type="checkbox"/> 4. Other backward caste ଅନ୍ୟ ପଛୁଆ ବର୍ଗ<br><input type="checkbox"/> 5. Scheduled tribe ଅନୁସୂଚିତ ଜନଜାତି<br><input type="checkbox"/> 6. Do not want to indicate caste ଜାତି କହିବାକୁ ଚାହୁଁନାହାନ୍ତି<br><input type="checkbox"/> 77. Not applicable ଉପଯୁକ୍ତ ନୁହେଁ<br><input type="checkbox"/> 88. Other ଅନ୍ୟାନ୍ୟ: _____<br><input type="checkbox"/> 99. Don't know ଜାଣି ନାହିଁ                                                                                                                    |

## COVID-19 Mobile Phone Interview – VWSC

|                                                                                                                                                                                                                                                                                                 |                                                                                                                                                                                                                                                                                                                                                                                                                                                                                                                                 |
|-------------------------------------------------------------------------------------------------------------------------------------------------------------------------------------------------------------------------------------------------------------------------------------------------|---------------------------------------------------------------------------------------------------------------------------------------------------------------------------------------------------------------------------------------------------------------------------------------------------------------------------------------------------------------------------------------------------------------------------------------------------------------------------------------------------------------------------------|
| <b>D4. What is the religion of the household?</b><br>ଆପଣଙ୍କର *କେଉଁ ଧର୍ମ*?                                                                                                                                                                                                                       | <input type="checkbox"/> 1. Hindu ହିନ୍ଦୁ<br><input type="checkbox"/> 2. Muslim ମୁସଲମାନ<br><input type="checkbox"/> 3. Christian ଖ୍ରୀଷ୍ଟିଆନ୍<br><input type="checkbox"/> 4. Sikh ଶିଖ୍<br><input type="checkbox"/> 5. Buddhist/Neo-buddhist ବୌଦ୍ଧ ଧର୍ମ<br><input type="checkbox"/> 6. Jain ଜୈନ ଧର୍ମ<br><input type="checkbox"/> 7. Jewish ଜାଇ ଧର୍ମ<br><input type="checkbox"/> 8. Parsi/Zoroastrian ପାର୍ସୀ ଧର୍ମ<br><input type="checkbox"/> 9. No Religion କୌଣସି ଧର୍ମ ନୁହେଁ<br><input type="checkbox"/> 88. Other ଅନ୍ୟାନ୍ୟ: _____ |
| <b>D5. Do you have an Antodaya Card and/or ration card? (select all that apply)</b><br>ଆପଣଙ୍କର ଅନ୍ତୋଦୟ /ରାସନ୍ କାର୍ଡ ଅଛି କି?                                                                                                                                                                     | <input type="checkbox"/> 1. Antodaya ଅନ୍ତୋଦୟ<br><input type="checkbox"/> 2. Ration card ରାସନ୍ କାର୍ଡ<br><input type="checkbox"/> 3. None କିଛି ନାହିଁ<br><input type="checkbox"/> 99. Don't know ଜାଣି ନାହିଁ                                                                                                                                                                                                                                                                                                                        |
| <b>END OF INTERVIEW:</b> Thank the respondent for their time and give them the COVID-19 information and resources summary provided by Gram Vikas.<br><br>ସାକ୍ଷାତକରଣ ଶେଷ: ଉତ୍ତରଦାତାଙ୍କୁ ତାଙ୍କ ସମୟ ପାଇଁ ଧନ୍ୟବାଦ ଜଣାନ୍ତୁ ଏବଂ ତାଙ୍କୁ ଗ୍ରାମବିକାଶ ଦ୍ୱାରା ଦିଆଯାଇଥିବା COVID-19 ସୂଚନା ବିଷୟରେ ଅବଗତ କରନ୍ତୁ |                                                                                                                                                                                                                                                                                                                                                                                                                                                                                                                                 |
| <b>End Time</b><br>ଶେଷ ସମୟ                                                                                                                                                                                                                                                                      |                                                                                                                                                                                                                                                                                                                                                                                                                                                                                                                                 |

## COVID-19 Mobile Phone Interview – Primary Caregiver

| SECTION A: Respondent and Enumerator Information & Consent Process                                                                                                                                                                                                                                                        |                                                                                                                                                                                                                                                                                                                                                                                                                                                                                                                                                                                                 |
|---------------------------------------------------------------------------------------------------------------------------------------------------------------------------------------------------------------------------------------------------------------------------------------------------------------------------|-------------------------------------------------------------------------------------------------------------------------------------------------------------------------------------------------------------------------------------------------------------------------------------------------------------------------------------------------------------------------------------------------------------------------------------------------------------------------------------------------------------------------------------------------------------------------------------------------|
| A1. Village ID ଗ୍ରାମ ର କୋଡ୍:                                                                                                                                                                                                                                                                                              | A2. Household ID ଘର ଘରର ସଂଖ୍ୟା                                                                                                                                                                                                                                                                                                                                                                                                                                                                                                                                                                  |
| A3. Village Name ଗ୍ରାମ ର ନାମ                                                                                                                                                                                                                                                                                              |                                                                                                                                                                                                                                                                                                                                                                                                                                                                                                                                                                                                 |
| A4. Date ତାରିଖ                                                                                                                                                                                                                                                                                                            | (y/d/m)                                                                                                                                                                                                                                                                                                                                                                                                                                                                                                                                                                                         |
| A5. Start Time ଆରମ୍ଭ ସମୟ                                                                                                                                                                                                                                                                                                  |                                                                                                                                                                                                                                                                                                                                                                                                                                                                                                                                                                                                 |
| A6. Enumerator name ଆପଣଙ୍କ ନାମ                                                                                                                                                                                                                                                                                            | <input type="checkbox"/> 1. Alok<br><input type="checkbox"/> 2. Dhiren<br><input type="checkbox"/> 3. Varsha                                                                                                                                                                                                                                                                                                                                                                                                                                                                                    |
| <b>A7. Confirm that the respondent and their family (if applicable) currently live in the intended village (and are not currently staying somewhere else).</b><br>ପୁଷ୍ଟି କରନ୍ତୁ କି ଯେ, ଉପଯୁକ୍ତ ଉତ୍ତରଦାତା ଏବଂ ତାଙ୍କ ପରିବାର (ଯଦି ଲାଗୁ ହୁଏ) ବର୍ତ୍ତମାନ ଉଦ୍ଦିଷ୍ଟ ଗ୍ରାମରେ ହିଁ ବସବାସ କରନ୍ତି (ଏବଂ ଅନ୍ୟ କେଉଁଠି ବସବାସ କରନ୍ତି ନାହିଁ) | <input type="checkbox"/> 1. Yes ହଁ<br><input type="checkbox"/> 2. No – respondent/family are staying outside the village and left <i>before</i> the pandemic → <b>END SURVEY</b><br>ନା - ଉତ୍ତରଦାତା ଓ ତାଙ୍କ ପରିବାର ଗ୍ରାମ ବାହାରେ ବସବାସ କରନ୍ତି ଏବଂ ସର୍ବସାଧାରଣ ମହାମାରୀ ହେବା ପୂର୍ବରୁ ଗ୍ରାମ ଛାଡି ଦେଇଛନ୍ତି - ସତର୍କ ଶେଷ<br><input type="checkbox"/> 3. No – respondent/family are staying outside the village and left <i>because of</i> the pandemic → <b>END SURVEY</b><br>ନା - ଉତ୍ତରଦାତା ଓ ତାଙ୍କ ପରିବାର ଗ୍ରାମ ବାହାରେ ବସବାସ କରନ୍ତି ଏବଂ ସର୍ବସାଧାରଣ ମହାମାରୀ ହେବା କାରଣରୁ ଗ୍ରାମ ଛାଡି ଦେଇଛନ୍ତି - ସତର୍କ ଶେଷ |
| <b>A8a. Read the consent form to the respondent and then ask for their consent to participate.</b><br>ଉତ୍ତରଦାତାଙ୍କ ପାଇଁ ସହମତି ପତ୍ରଟିକୁ ପଢନ୍ତୁ ଏବଂ ତାଙ୍କୁ ସତର୍କରେ ଅଂଶଗ୍ରହଣ ପାଇଁ ସହମତି ମାଗନ୍ତୁ।<br><br>Does the respondent consent to the survey?<br>କ'ଣ ଉତ୍ତରଦାତା ସତର୍କରେ ଅଂଶଗ୍ରହଣ ପାଇଁ ସହମତି ପ୍ରଦାନ କଲେ?                  | <input type="checkbox"/> 1. Yes ହଁ<br><input type="checkbox"/> 2. No → <b>END SURVEY</b> ନା - ସତର୍କ ଶେଷ                                                                                                                                                                                                                                                                                                                                                                                                                                                                                         |
| <b>A8b. Does the respondent consent to having the phone call audio recorded?</b><br>କଣ ଉତ୍ତରଦାତା ଫୋନ୍ କଲର ରେକର୍ଡିଙ୍ଗ ପାଇଁ ସହମତି ପ୍ରଦାନ କଲେ?                                                                                                                                                                               | <input type="checkbox"/> 1. Yes ହଁ<br><input type="checkbox"/> 2. No ନା → Pause when you need to in order to record detailed responses! ଯେତେବେଳେ ଉତ୍ତର ଲେଖିବା ଆବଶ୍ୟକ ପଡେ, ବିରାମ ନିଅନ୍ତୁ।                                                                                                                                                                                                                                                                                                                                                                                                        |
| <b>ENUMERATOR NOTE:</b> Now you are going to begin the survey. ଏବୁମରେଚରଙ୍କ ପାଇଁ ନୋଟ: ବର୍ତ୍ତମାନ ଆପଣ ସତର୍କ ଆରମ୍ଭ କରିବେ                                                                                                                                                                                                      |                                                                                                                                                                                                                                                                                                                                                                                                                                                                                                                                                                                                 |
| A9. What is your name?<br>ଆପଣଙ୍କ ନାମ କଣ ?                                                                                                                                                                                                                                                                                 |                                                                                                                                                                                                                                                                                                                                                                                                                                                                                                                                                                                                 |
| <b>A10. What is the sex of the respondent?</b><br>ଉତ୍ତରଦାତାଙ୍କ ଲିଙ୍ଗ କଣ?<br><br><b>Enumerator Note:</b> Clarify with the respondent if you are not sure. ଏବୁମରେଚର ନୋଟ - ସ୍ପଷ୍ଟ କରନ୍ତୁ ଯେବେ ଆପଣ ନିଶ୍ଚିତ ନୁହଁନ୍ତି                                                                                                           | <input type="checkbox"/> 1. Male ପୁରୁଷ<br><input type="checkbox"/> 2. Female ମହିଳା                                                                                                                                                                                                                                                                                                                                                                                                                                                                                                              |
| A11. What is your age? ଆପଣଙ୍କ ବୟସ କେତେ?                                                                                                                                                                                                                                                                                   | _____ (years) (ବର୍ଷ)                                                                                                                                                                                                                                                                                                                                                                                                                                                                                                                                                                            |

## COVID-19 Mobile Phone Interview – Primary Caregiver

|                                                                                                                                                                                               |                                                                                                                                                                                                                                                                                                                                                                                                                                                                                                                                                                                                                                                                                                                                                         |
|-----------------------------------------------------------------------------------------------------------------------------------------------------------------------------------------------|---------------------------------------------------------------------------------------------------------------------------------------------------------------------------------------------------------------------------------------------------------------------------------------------------------------------------------------------------------------------------------------------------------------------------------------------------------------------------------------------------------------------------------------------------------------------------------------------------------------------------------------------------------------------------------------------------------------------------------------------------------|
| <p><b>A12.</b> Including yourself, how many people are currently staying in your house?</p> <p>ଆପଣଙ୍କୁ ମିଶେଇ, ବର୍ତ୍ତମାନ ଆପଣଙ୍କ ଘରେ କେତେଜଣ ଲୋକ ରୁହନ୍ତି?</p>                                    | <div style="border-bottom: 1px solid black; height: 20px; width: 100%;"></div>                                                                                                                                                                                                                                                                                                                                                                                                                                                                                                                                                                                                                                                                          |
| <p><b>A13.</b> How many children &lt;5 years old currently live in your household?</p> <p>ପାଞ୍ଚ ବର୍ଷରୁ କମ ବୟସର କେତେଜଣ ପିଲା ବର୍ତ୍ତମାନ ଏହି ଘରେ ବସବାସ କରନ୍ତି?</p>                                | <div style="border-bottom: 1px solid black; height: 20px; width: 100%;"></div> <p><b><u>Record Age of each child &lt;5:</u></b></p> <p>Child 1: Years: _____ Months: _____</p> <p>Child 2: Years: _____ Months: _____</p> <p>Child 3: Years: _____ Months: _____</p>                                                                                                                                                                                                                                                                                                                                                                                                                                                                                    |
| <p><b>A14.</b> Is anyone in your household a daily wage labourer who usually works in another state?</p> <p>କଣ ଆପଣଙ୍କ ଘରର କେହି ଦିନ ମଜୁରିଆ ଅଟନ୍ତି କି ଯେ ସାଧାରଣତଃ ଅନ୍ୟ ରାଜ୍ୟରେ କାମ କରନ୍ତି ?</p> | <p><input type="checkbox"/> 1. Yes ହଁ - And they are still residing in another state ହଁ- ସେମାନେ ବର୍ତ୍ତମାନ ମଧ୍ୟ ଅନ୍ୟ ରାଜ୍ୟରେ ରହୁଛନ୍ତି</p> <p><input type="checkbox"/> 2. Yes ହଁ - But now they reside in Odisha ହଁ- କିନ୍ତୁ ସେମାନେ ବର୍ତ୍ତମାନ ଓଡ଼ିଶାରେ ରହୁଛନ୍ତି</p> <p><input type="checkbox"/> 3. No ନା</p> <p><b>→ If Yes (1 or 2): ଯଦି ଉତ୍ତର ହଁ (1 କିମ୍ବା 2)</b></p> <p>How is this household member related to you?<br/>(for example, husband, brother-in-law, etc.)</p> <p>ଘରର ଏହି ସଦସ୍ୟ ଆପଣଙ୍କର କଣ ଲାଗିବେ?<br/>(ଭବାନୀରଣ ସ୍ୱରୂପ: ସ୍ୱାମୀ, ଦିଅର, ଭଉଣୀ, ଇତ୍ୟାଦି)</p>                                                                                                                                                                                     |
| <p><b>A15.</b> Do you have piped water to your household or compound?</p> <p>କଣ ଆପଣଙ୍କ ଘରକୁ ପାଇପ ଯୋଗେ ପାଣିର ବ୍ୟବସ୍ଥା ଅଛି?</p>                                                                 | <p><input type="checkbox"/> 1. Yes – functional ହଁ- ସକ୍ରିୟ</p> <p><input type="checkbox"/> 2. Yes – not functional ହଁ- ନିଷ୍କ୍ରିୟ</p> <p><input type="checkbox"/> 3. No ନା</p> <p><b><u>If 2 or 3:</u></b></p> <p>What is your primary source of water and where is it located?</p> <p><b><u>ଯଦି 2 କିମ୍ବା 3:</u></b></p> <p>ଆପଣଙ୍କ ଘରର ମୁଖ୍ୟ ଜଳଉତ୍ସର କଣ ଓ ଏହା କେଉଁଠି ଠାରେ ଅବସ୍ଥିତ?</p> <p><b>Source (ଉତ୍ସ):</b></p> <p><input type="checkbox"/> 1. Public tap ପବ୍ଲିକ୍‌ଟାପ/ସର୍ବସାଧାରଣତ୍ୟାଗ୍</p> <p><input type="checkbox"/> 2. Well/borehole/spring କୁଅ, ନଳକୂଅ, ଝରଣା</p> <p><input type="checkbox"/> 3. Surface water (river/dam/lake/pond/stream/canal) ଭୂତଳଜଳ(ନଦୀ/ବନ୍ଧ/ହ୍ରଦ/ପୋଖରୀ/ନାଳ/କେନାଲ)</p> <p><input type="checkbox"/> 4. Rainwater ବର୍ଷାପାଣି</p> |

## COVID-19 Mobile Phone Interview – Primary Caregiver

|                                                                                                                                                                                                                                                                                                                                                                                                             |                                                                                                                                                                                                                                                                                                                                                                                                                                                                                                                                                                                                                                              |
|-------------------------------------------------------------------------------------------------------------------------------------------------------------------------------------------------------------------------------------------------------------------------------------------------------------------------------------------------------------------------------------------------------------|----------------------------------------------------------------------------------------------------------------------------------------------------------------------------------------------------------------------------------------------------------------------------------------------------------------------------------------------------------------------------------------------------------------------------------------------------------------------------------------------------------------------------------------------------------------------------------------------------------------------------------------------|
|                                                                                                                                                                                                                                                                                                                                                                                                             | <input type="checkbox"/> 5. Bottled water ବୋତଲପାଣି<br><input type="checkbox"/> 6. Other ଅନ୍ୟାନ୍ୟ<br><input type="checkbox"/> 7. Don't know ଜାଣିନାହିଁ<br><br><b>Location: ଅବସ୍ଥାନ</b><br><input type="checkbox"/> 1. In own dwelling ନିଜ ରହିବା ଜାଗାରେ<br><input type="checkbox"/> 2. In own yard/plot/compound ନିଜଜାଗା/ପ୍ଲଟରେ/ଅଗଣାରେ<br><input type="checkbox"/> 3. Outside the household compound ଘର ଅଗଣା/ପରିସର ବାହାରେ                                                                                                                                                                                                                       |
| <b>A16.</b> Does your household have a latrine?<br><br>କଣ ଆପଣଙ୍କ ଘରେ ପାଇଖାନା ଅଛି?                                                                                                                                                                                                                                                                                                                           | <input type="checkbox"/> 1. Yes – functional ହଁ- ସକ୍ରିୟ<br><input type="checkbox"/> 2. Yes – not functional ହଁ- ନିଷ୍କ୍ରିୟ<br><input type="checkbox"/> 3. No ନାହିଁ                                                                                                                                                                                                                                                                                                                                                                                                                                                                            |
| <b>A17.</b> Do you have an enclosed bathing area in your household compound?<br><br>କଣ ଆପଣଙ୍କ ଘର ପରିସର ମଧ୍ୟରେ ଏକ ଆବକ୍ଷ ଗାଧୁଆଁଘର ଅଛି କି?                                                                                                                                                                                                                                                                     | <input type="checkbox"/> 1. Yes ହଁ<br><input type="checkbox"/> 2. No ନା                                                                                                                                                                                                                                                                                                                                                                                                                                                                                                                                                                      |
| <b>A18.</b> Do you currently have soap or detergent in your household?<br><br>ଆପଣଙ୍କ ଗହରେ ବର୍ତ୍ତମାନ ସାବୁନ କିମ୍ବା ଲୁଗାଧୁଆ ପାଉଁଶ ଅଛି କି?                                                                                                                                                                                                                                                                      | <input type="checkbox"/> 1. Yes ହଁ<br><input type="checkbox"/> 2. No ନାହିଁ<br><input type="checkbox"/> 99. Don't know ଜାଣି ନାହିଁ                                                                                                                                                                                                                                                                                                                                                                                                                                                                                                             |
| <b>SECTION B: COVID-19 Knowledge, Perceptions, and Actions</b><br><br><b>ENUMERATOR READ:</b> Thank you for your responses so far. Now I'm going to ask you some questions related to coronavirus.<br>ଏନୁମରେଟର ପଢନ୍ତୁ : ବର୍ତ୍ତମାନ ପର୍ଯ୍ୟନ୍ତ ଦେଇଥିବା ଉତ୍ତର ମାନଙ୍କ ପାଇଁ ଧନ୍ୟବାଦ। ବର୍ତ୍ତମାନ, ମୁଁ ଆପଣଙ୍କୁ କରୋନାଭାଇରସ ସହିତ ଜଡିତ କିଛି ପ୍ରଶ୍ନ ପଚାରିବି।                                                             |                                                                                                                                                                                                                                                                                                                                                                                                                                                                                                                                                                                                                                              |
| <b>B1.</b> Have you heard of a disease called covid-19, coronavirus, or corona?<br><br>କଣ ଆପଣ କୋଭିଡ-୧୯, କରୋନାଭାଇରସ କିମ୍ବା କରୋନା ନାମକ ରୋଗ ବିଷୟରେ ଶୁଣିଛନ୍ତି?                                                                                                                                                                                                                                                  | <input type="checkbox"/> 1. Yes ହଁ<br><input type="checkbox"/> 2. No → <b>If no, explain that this is the disease that has led to the recent lockdowns in India.</b> ନା → ଯଦି ନା, ତାହେଲେ ଏହା କୁହନ୍ତୁ କି ଯେ ଏହି ରୋଗ ପାଇଁ ହଁ ଏବେ ଭାରତରେ ଲକଡାଉନ ହୋଇଛି                                                                                                                                                                                                                                                                                                                                                                                           |
| <b>B2.</b> What are the symptoms of coronavirus?<br>କରୋନାଭାଇରସର ଲକ୍ଷଣ ଗୁଡିକ କଣ?<br><br><b>Probe:</b> Anything else?<br>ପ୍ରୋବ : ଆଉ କିଛି?<br><br><b>Enumerator Notes:</b><br>Do <b>NOT</b> read response options. Select all that apply.<br>ସମ୍ଭାବ୍ୟ ଉତ୍ତର ଗୁଡିକୁ ପଢନ୍ତୁ ନାହିଁ। ଦେଇଥିବା ଉତ୍ତର ଗୁଡିକୁ ଟୀକ କରନ୍ତୁ।<br><br>If respondent says sick/flu as their response, ask them to specify specific symptoms. | <input type="checkbox"/> 1. No symptoms କିଛି ଲକ୍ଷଣ ନାହିଁ<br><input type="checkbox"/> 2. Fever ଜ୍ୱର<br><input type="checkbox"/> 3. Cough କାଶ<br><input type="checkbox"/> 4. Dry cough ଶୁଖିଲା କାସ<br><input type="checkbox"/> 5. Headache ମୁଣ୍ଡବଥା<br><input type="checkbox"/> 6. Body aches ଶରୀର ବ୍ୟଥା<br><input type="checkbox"/> 7. Difficulty breathing ନିଶ୍ୱାସ ନେବାରେ ଅସୁବିଧା<br><input type="checkbox"/> 8. Chest pain ଛାତି ଯନ୍ତ୍ରଣା<br><input type="checkbox"/> 9. Tiredness କ୍ଲାନ୍ତି<br><input type="checkbox"/> 10. Diarrhea ଡାହାରିଆ<br><input type="checkbox"/> 11. Chills ଥଣ୍ଡା ଲାଗିବା<br><input type="checkbox"/> 12. Rash କୁଣ୍ଡିଆ |



## COVID-19 Mobile Phone Interview – Primary Caregiver

|                                                                                                                                                                                                                                                                                                                                                                                                                                                                                                                                                              |                                                                                                                                                                                                                                                                                                                                                                                                                                                                                                                                                                                                                                                                                                                                                                                                                                                                                                                                                                                                                                                                                                                                                                                                                                                                                                                                             |
|--------------------------------------------------------------------------------------------------------------------------------------------------------------------------------------------------------------------------------------------------------------------------------------------------------------------------------------------------------------------------------------------------------------------------------------------------------------------------------------------------------------------------------------------------------------|---------------------------------------------------------------------------------------------------------------------------------------------------------------------------------------------------------------------------------------------------------------------------------------------------------------------------------------------------------------------------------------------------------------------------------------------------------------------------------------------------------------------------------------------------------------------------------------------------------------------------------------------------------------------------------------------------------------------------------------------------------------------------------------------------------------------------------------------------------------------------------------------------------------------------------------------------------------------------------------------------------------------------------------------------------------------------------------------------------------------------------------------------------------------------------------------------------------------------------------------------------------------------------------------------------------------------------------------|
| <p>ଯଦି ଉତ୍ତରଦାତା ଅସୁସ୍ଥ ଲାଗିବା/ ଅଣ୍ଡା ହେବା ବିଷୟରେ କୁହନ୍ତି, ତାଙ୍କୁ ନିର୍ଦ୍ଦିଷ୍ଟ ଲକ୍ଷଣ ଗୁଡ଼ିକ ବିଷୟରେ କହିବାକୁ କୁହନ୍ତୁ</p>                                                                                                                                                                                                                                                                                                                                                                                                                                        | <div style="display: flex; flex-direction: column; gap: 5px;"> <input type="checkbox"/> 13. Loss of smell and/or taste ଗନ୍ଧ କିମ୍ବା ସ୍ବାଦ ବାରିପାରୁନାହାନ୍ତି</div> <div style="display: flex; flex-direction: column; gap: 5px;"> <input type="checkbox"/> 14. Dizziness ମୁଣ୍ଡ ବୁଲେଇବା</div> <div style="display: flex; flex-direction: column; gap: 5px;"> <input type="checkbox"/> 15. Sneezing ଛିଙ୍କ/ଜିଙ୍କ</div> <div style="display: flex; flex-direction: column; gap: 5px;"> <input type="checkbox"/> 16. Sore throat ଖରାପ ଗଳା</div> <div style="display: flex; flex-direction: column; gap: 5px;"> <input type="checkbox"/> 88. Other ଅନ୍ୟାନ୍ୟ: _____</div> <div style="display: flex; flex-direction: column; gap: 5px;"> <input type="checkbox"/> 99. Don't know ଜାଣିନାହିଁ</div>                                                                                                                                                                                                                                                                                                                                                                                                                                                                                                                                                      |
| <p><b>B3. What causes a person to get sick with coronavirus?</b></p> <p>କେଉଁ କାରଣ ମାନଙ୍କ ପାଇଁ ଜଣଙ୍କୁ କରୋନା ଭାଇରସ ହୋଇଥାଏ?</p> <p><b>Enumerator Notes:</b><br/>Probe for respondent to describe in detail. If the respondent is having trouble answering, ask:<br/>“What actions would increase your risk of getting coronavirus? Why?”</p> <p>ଏନୁମରେଟରଙ୍କ ପାଇଁ ନୋଟ:<br/>ଉତ୍ତରଦାତାଙ୍କୁ ବର୍ଣ୍ଣନା କରିବା ପାଇଁ ଅନୁସନ୍ଧାନ କରନ୍ତୁ। ଯଦି ଉତ୍ତରଦାତାଙ୍କୁ ଉତ୍ତର ଦେବାରେ ଅସୁବିଧା ହେଉଥାଏ, ପଚାରନ୍ତୁ,<br/>“କେଉଁ କମ ଆପଣଙ୍କର କରୋନାଭାଇରସ ହେବାର ଆଶଙ୍କାକୁ ବଢେଇଦେଇଥାଏ? କାହିଁକି?”</p> |                                                                                                                                                                                                                                                                                                                                                                                                                                                                                                                                                                                                                                                                                                                                                                                                                                                                                                                                                                                                                                                                                                                                                                                                                                                                                                                                             |
| <p><b>B4. Do you think your personal chance of getting coronavirus is low, medium, high, or do you have no risk at all? Explain why.</b></p> <p>ଆପଣଙ୍କୁ ଲାଗୁଛି କି ଯେ ଆପଣଙ୍କୁ କରୋନାଭାଇରସ ହେବାର ବ୍ୟକ୍ତିଗତ ସମ୍ଭାବନା କମ, ମଧ୍ୟମ, ଅଧିକ ଅଥବା ଆପଣଙ୍କ ପ୍ରତି କିଛି ବି ବିପଦ ନାହିଁ? ବର୍ଣ୍ଣନା କରନ୍ତୁ କାହିଁକି।</p>                                                                                                                                                                                                                                                          | <div style="display: flex; flex-direction: column; gap: 5px;"> <input type="checkbox"/> 1. Low କମ</div> <div style="display: flex; flex-direction: column; gap: 5px;"> <input type="checkbox"/> 2. Medium ମାଧ୍ୟମ</div> <div style="display: flex; flex-direction: column; gap: 5px;"> <input type="checkbox"/> 3. High ଅଧିକ</div> <div style="display: flex; flex-direction: column; gap: 5px;"> <input type="checkbox"/> 4. No risk କିଛି ବିପଦ ନୁହେଁ</div> <div style="display: flex; flex-direction: column; gap: 5px;"> <input type="checkbox"/> 99. Don't know ଜାଣିନାହିଁ</div> <p><b><u>Explain why: ବର୍ଣ୍ଣନା କରନ୍ତୁ କାହିଁକି</u></b></p>                                                                                                                                                                                                                                                                                                                                                                                                                                                                                                                                                                                                                                                                                                 |
| <p><b>B5. What types of people are at high risk for getting very seriously sick if they get coronavirus?</b></p> <p>କେଉଁ ପ୍ରକାର ଲୋକଙ୍କୁ କରୋନା ଭାଇରସ ହେଲେ ସେମାନେ ସର୍ବାଧିକ ଅସୁସ୍ଥ ହେବାର ବିପଦ ଅଛି?</p> <p><b>Enumerator Notes:</b><br/>Do <b>NOT</b> read response options. Select all that apply.<br/>ଏନୁମରେଟରଙ୍କ ପାଇଁ ନୋଟ: ବିକଳ ଉତ୍ତର ଗୁଡ଼ିକୁ ପଢନ୍ତୁ ନାହିଁ। ଦେଇଥିବା ସମସ୍ତ ଉତ୍ତରକୁ ବାଛନ୍ତୁ।</p>                                                                                                                                                                | <div style="display: flex; flex-direction: column; gap: 5px;"> <input type="checkbox"/> 1. Elderly/Over 60 ବୃଦ୍ଧ/60 ରୁ ଊର୍ଦ୍ଧ୍ବ</div> <div style="display: flex; flex-direction: column; gap: 5px;"> <input type="checkbox"/> 2. Men ପୁରୁଷ</div> <div style="display: flex; flex-direction: column; gap: 5px;"> <input type="checkbox"/> 3. Women ମହିଳା</div> <div style="display: flex; flex-direction: column; gap: 5px;"> <input type="checkbox"/> 4. Babies (&lt;1 year) ଛୁଆ (&lt;୧ ବର୍ଷ)</div> <div style="display: flex; flex-direction: column; gap: 5px;"> <input type="checkbox"/> 5. Children ପିଲା</div> <div style="display: flex; flex-direction: column; gap: 5px;"> <input type="checkbox"/> 6. Pregnant women ଗର୍ଭବତୀ ମହିଳା</div> <div style="display: flex; flex-direction: column; gap: 5px;"> <input type="checkbox"/> 7. People who are already sick/weak immune systems<br/>ଯେଉଁ ଲୋକମାନେ ପୂର୍ବରୁ ଅସୁସ୍ଥ/ ଯାହାର ରୋଗପ୍ରତିରୋଧକ ପ୍ରଣାଳୀ ଦୁର୍ବଳ ଅଟେ</div> <div style="display: flex; flex-direction: column; gap: 5px;"> <input type="checkbox"/> 8. Everyone ସମସ୍ତଙ୍କୁ</div> <div style="display: flex; flex-direction: column; gap: 5px;"> <input type="checkbox"/> 88. Other ଅନ୍ୟାନ୍ୟ: _____</div> <div style="display: flex; flex-direction: column; gap: 5px;"> <input type="checkbox"/> 99. Don't know ଜଣା ନାହିଁ</div> |

## COVID-19 Mobile Phone Interview – Primary Caregiver

|                                                                                                                                                                                                                                                                                                                                                                                                                                                                                                                                                                  |                                                                                                                                                                                                                                                                                                                                                                                                                                                                                                                                                                                                                                                                                                                                                                                                                                                                                                                                                                                                                                                                                                                                                                                                                                                                                                                                                                                                                                                                                                                                                                                                                                                                                                                                                                                                                                                                                                                                                                                                                                                                                                                                                                                                                                                       |
|------------------------------------------------------------------------------------------------------------------------------------------------------------------------------------------------------------------------------------------------------------------------------------------------------------------------------------------------------------------------------------------------------------------------------------------------------------------------------------------------------------------------------------------------------------------|-------------------------------------------------------------------------------------------------------------------------------------------------------------------------------------------------------------------------------------------------------------------------------------------------------------------------------------------------------------------------------------------------------------------------------------------------------------------------------------------------------------------------------------------------------------------------------------------------------------------------------------------------------------------------------------------------------------------------------------------------------------------------------------------------------------------------------------------------------------------------------------------------------------------------------------------------------------------------------------------------------------------------------------------------------------------------------------------------------------------------------------------------------------------------------------------------------------------------------------------------------------------------------------------------------------------------------------------------------------------------------------------------------------------------------------------------------------------------------------------------------------------------------------------------------------------------------------------------------------------------------------------------------------------------------------------------------------------------------------------------------------------------------------------------------------------------------------------------------------------------------------------------------------------------------------------------------------------------------------------------------------------------------------------------------------------------------------------------------------------------------------------------------------------------------------------------------------------------------------------------------|
| <p><b>B6. In the past 7 days, what actions have you and your family taken to avoid getting coronavirus? I am going to read a list of actions. For each one, please tell me yes or no.</b></p> <p>ଗତ ସାତ ଦିନ ମଧ୍ୟରେ, ଆପଣ ଓ ଆପଣଙ୍କ ପରିବାରର ସଦସ୍ୟ ମାନେ ନିଜକୁ କରୋନାଭାଇରସରୁ ଦୂରେଇ ରଖିବାକୁ କଣ ପଦକ୍ଷେପ ନେଇଛନ୍ତି? ମୁଁ କିଛି ପଦକ୍ଷେପ ପଢୁଛି। ପ୍ରତିଟି ପଦକ୍ଷେପ ପାଇଁ ହଁ କିମ୍ବା ନାହିଁ କୁହନ୍ତୁ।</p> <p><b>Enumerator Notes:</b><br/>Select each action that the respondent says 'yes' for.</p> <p>ଏମ୍ବୁମ୍ବରେଟର ନୋଟ: ସବୁ ପଦକ୍ଷେପ ବାଛିନ୍ତୁ, ଯାହାପାଇଁ ଉତ୍ତରଦାତା 'ହଁ' କହିଛନ୍ତି ।</p> | <div style="display: flex; flex-direction: column; gap: 5px;"> <div><input type="checkbox"/> 1. Stayed at home as much as possible<br/>ଯେତେ ପାରିଲେ, ଘରେ ରହିଛନ୍ତି</div> <div><input type="checkbox"/> 2. Did not attend school or work<br/>ସ୍କୁଲ କିମ୍ବା କାମକୁ ଯାଇନାହାନ୍ତି</div> <div><input type="checkbox"/> 3. Did not attend social gatherings (e.g., weddings, funerals, church, temple)<br/>ସାମାଜିକ ସମାବେଶକୁ ଯାଇନାହାନ୍ତି (ଉଦାହରଣ : ବିବାହ, ଅନ୍ତିମ ସଂସ୍କାର, ଗୀର୍ତ୍ତାଘର, ମନ୍ଦିର)</div> <div><input type="checkbox"/> 4. Kept a distance from others → What distance? _____ meters<br/>ଅନ୍ୟ ମାନଙ୍କ ଠାରୁ ଦୂରରେ ରଖିଛନ୍ତି – କେତେ ମିଟର ଦୂରରେ</div> <div><input type="checkbox"/> 6. Washed hands/used hand sanitizer more frequently<br/>ହାତ ଧୋଇବା / ହାତଟାଇଜର ର ବ୍ୟବହାର ବଢ଼େଇ ଦେଇଛନ୍ତି</div> <div><input type="checkbox"/> 7. Wore a (face) mask<br/>ମାସ୍କ ପିନ୍ଧିଛନ୍ତି</div> <div><input type="checkbox"/> 8. Wore gloves (on your hands)<br/>ଗ୍ଲୋବ୍ ପିନ୍ଧିଛନ୍ତି</div> <div><input type="checkbox"/> 9. Tried to stop touching face<br/>ମୁହଁଟିକୁ ନ ଛୁଇଁବାର ଚେଷ୍ଟା କରିଛନ୍ତି</div> <div><input type="checkbox"/> 10. Did not shake hands with others<br/>ଅନ୍ୟମାନଙ୍କ ସହିତ ହାତ ମିଶେଇ ନାହାନ୍ତି</div> <div><input type="checkbox"/> 11. Covered your mouth with elbow when you sneezed or coughed<br/>ଛିଙ୍କିବା କିମ୍ବା କାଶିବା ସମୟରେ ପାଟିକୁ ବାହୁରେ ଘୋଡାଇ ଦେଇଛନ୍ତି</div> <div><input type="checkbox"/> 12. Drank local alcohol ଦେଶୀ ମଦ ପିଇଛନ୍ତି</div> <div><input type="checkbox"/> 13. Scrubbed/cleaned surfaces such as door handles, faucets, phone, etc.<br/>କୌଣସି ପୃଷ୍ଠକୁ ଘସିଛନ୍ତି/ସଫା କରିଛନ୍ତି ଯେପରିକି ଡୋର ହାଣ୍ଡଲ, ଟ୍ୟାପ, ଫୋନ୍ ଇତ୍ୟାଦି</div> <div><input type="checkbox"/> 14. Informed people of illness symptoms<br/>ଲୋକ ମାନଙ୍କୁ ରୋଗର ଲକ୍ଷଣ ବିଷୟରେ ଜଣେଇଛନ୍ତି</div> <div><input type="checkbox"/> 15. Contacted a coronavirus helpline<br/>କୌଣସି କରୋନାଭାଇରସ ହେଲ୍ପଲାଇନ କୁ ଯୋଗାଯୋଗ କରିଛନ୍ତି</div> <div><input type="checkbox"/> 16. Avoided hospitals/clinics<br/>ହସ୍ପିଟାଲ କିମ୍ବା କ୍ଲିନିକକୁ ଏଡେଇଛନ୍ତି</div> <div><input type="checkbox"/> 17. Avoided public transit/traveling<br/>ସର୍ବ ସାଧାରଣ ପରିବହନ/ଭ୍ରମଣକୁ ଏଡେଇଛନ୍ତି</div> <div><input type="checkbox"/> 18. Nothing କିଛି ନୁହେଁ</div> <div><input type="checkbox"/> 88. Other ଅନ୍ୟାନ୍ୟ: _____</div> </div> |
| <p><b>B7. What are some of the challenges you and your family face in being able to frequently wash your hands with water and soap?</b></p> <p>ସାବୁନ ଓ ପାଣିରେ ବାରମ୍ବାର ହାତ ଧୋଇବାକୁ ନେଇ ଆପଣ ଓ ଆପଣଙ୍କ ପରିବାରର ସଦସ୍ୟ କେଉଁ ଅସୁବିଧାର ସମ୍ମୁଖୀନ ହୁଅନ୍ତି?</p>                                                                                                                                                                                                                                                                                                            | <p><b>Follow-up:</b><br/>The last time you needed to purchase soap for your household, did you experience any difficulties with getting the soap? Please explain.</p> <p>ଶେଷଥର ପାଇଁ, ଯେବେ ଆପଣ ନିଜ ଘର ପାଇଁ ସାବୁନ କିଣିବାକୁ ଚାହଁଲେ, କଣ ଆପଣଙ୍କୁ ସାବୁନ ମିଳିବାରେ କିଛି ଅସୁବିଧା ଅନୁଭବ ହେଲା କି? ଦୟାକରି ବର୍ଣ୍ଣନା କରନ୍ତୁ।</p>                                                                                                                                                                                                                                                                                                                                                                                                                                                                                                                                                                                                                                                                                                                                                                                                                                                                                                                                                                                                                                                                                                                                                                                                                                                                                                                                                                                                                                                                                                                                                                                                                                                                                                                                                                                                                                                                                                                                    |

## COVID-19 Mobile Phone Interview – Primary Caregiver

### SECTION C: COVID-19 Impact on Daily Life and Child Feces Management Practices

**ENUMERATOR READ:** Now I am going to ask you some questions about whether or not life is different because of coronavirus or the lockdown. I'm going to ask you some questions about how your daily life has changed and how your childcare practices have changed, if changed. So for these questions, you want to think about what conditions were like **BEFORE** coronavirus and the lockdown and compare that to what things are like **NOW**.

ଏନ୍ୟୁମେରେଟର ପଢନ୍ତୁ : ବର୍ତ୍ତମାନ ମୁଁ ଆପଣଙ୍କୁ କିଛି ପ୍ରଶ୍ନ, କଣ ଆପଣଙ୍କ ଜୀବନ କାରୋନାଭାଇରସ କିମ୍ବା ଲକଡାଉନ ପାଇଁ ଅଲଗା କି ନୁହେଁ ପଚାରିବି। ମୁଁ ଆପଣଙ୍କୁ କିଛି ପ୍ରଶ୍ନ ଆପଣଙ୍କ ଦୈନିକ ଜୀବନ କିପରି ବଦଳିଛି ଏବଂ ଆପଣଙ୍କ ଶିଶୁମତ୍ସ ଅଭ୍ୟାସ କିପରି ବଦଳିଛି, ଯଦି ବଦଳିଛି, ସେ ଉପରେ ପଚାରିବି। ଏହି ପ୍ରଶ୍ନମାନଙ୍କ ପାଇଁ, ଆପଣଙ୍କୁ ଭାବିବାକୁ ପଡିବ ଯେ କାରୋନାଭାଇରସ କିମ୍ବା ଲକଡାଉନ ପୂର୍ବରୁ ଛିଡା କିପରି ଥିଲା ଏବଂ ଏହାକୁ ବର୍ତ୍ତମାନର ଛିଡା ସହିତ ତୁଳନା କରନ୍ତୁ।

**C1.** How has coronavirus or the lockdown changed your daily life? Think about from the time you get up in the morning to the time you go to sleep at night. How is your day different now, if it is different?

କାରୋନାଭାଇରସ କିମ୍ବା ଲକଡାଉନ ଆପଣଙ୍କ ଦୈନିକ ଜୀବନକୁ କିପରି ବଦଳାଇ ଦେଇଛି? ସକାଳୁ ଉଠିବା ସମୟରୁ ଆରମ୍ଭ କରି ରାତିରେ ଶୋଇବାକୁ ଯିବା ପର୍ଯ୍ୟନ୍ତ ସମୟ ବିଷୟରେ ଭାବନ୍ତୁ। ବର୍ତ୍ତମାନ ଆପଣଙ୍କ ଦିନ ଅଲଗା କିପରି, ଯଦି ଅଲଗା ହୋଇଥାଏ?

**Probes:** ଅନୁସନ୍ଧାନ:

- Staying at home more? ଘରେ ଅଧିକ ସମୟ ରହୁଛନ୍ତି?
- More/less workload? ଅଧିକ/କମ କାମ
- More/less free time? ଅଧିକ/କମ ଖାଲି ସମୟ
- Is there anywhere in the village you *used* to go but no longer go? ଗାଁରେ ଏପରି କିଛି ଜାଗା ଅଛି କି ଯେଉଁଠି ଆପଣ ଯାଉଥିଲେ କିନ୍ତୁ ଆଉ ଯାଉ ନାହାନ୍ତି?

**C2.** Has coronavirus or the lockdown changed how you or your family **interact with other members of your village**? Please explain.

କଣ କାରୋନାଭାଇରସ କିମ୍ବା ଲକଡାଉନ ଆପଣଙ୍କର କିମ୍ବା ଆପଣଙ୍କ ପରିବାରର ଗ୍ରାମର ଅନ୍ୟ ଲୋକମାନଙ୍କ ସହିତ ମିଳାମିଶାରେ କିଛି ପରିବର୍ତ୍ତନ ଆଣିଛି? ଦୟାକରି ବର୍ଣ୍ଣନା କରନ୍ତୁ।

- ☐ 1. Yes ହଁ  
☐ 2. No ନାହିଁ

**Please explain.** ଦୟାକରି ବର୍ଣ୍ଣନା କରନ୍ତୁ।

**ENUMERATOR READ:** Now I am going to ask you some questions about your youngest child. Please think about this child.

ଏନ୍ୟୁମେରେଟର ପଢନ୍ତୁ : ବର୍ତ୍ତମାନ ମୁଁ ଆପଣଙ୍କୁ ଆପଣଙ୍କ ସବୁଠୁ ଛୋଟ ପିଲା ବିଷୟରେ କିଛି ପ୍ରଶ୍ନ ପଚାରିବାକୁ ଯାଉଛି। ଏହି ପିଲାଟି ବିଷୟରେ ଭାବନ୍ତୁ।

**ENUMERATOR CONFIRM:** Please record again the age of the youngest child <5 years old, who is being discussed:

ଏନ୍ୟୁମେରେଟର ପୁଣି କରନ୍ତୁ: ଦୟାକରି, 5 ବର୍ଷରୁ କମ ସବୁଠୁ ଛୋଟ ପିଲା, ଯାହା ବିଷୟରେ ଚର୍ଚ୍ଚା କରାଯାଉଛି, ତା'ର ବୟସ ଟିପନ୍ତୁ।

Years: ବର୍ଷ \_\_\_\_\_ Months: ମାସ \_\_\_\_\_

## COVID-19 Mobile Phone Interview – Primary Caregiver

|                                                                                                                                                                                                                                                                                                                                                                                                                                                                                                                                                                                                                                                                                                          |                                                                                                                                                                                                                                                                                                                                                                                                                                                                                                                                                                                                                                                                                                                                                                                                              |
|----------------------------------------------------------------------------------------------------------------------------------------------------------------------------------------------------------------------------------------------------------------------------------------------------------------------------------------------------------------------------------------------------------------------------------------------------------------------------------------------------------------------------------------------------------------------------------------------------------------------------------------------------------------------------------------------------------|--------------------------------------------------------------------------------------------------------------------------------------------------------------------------------------------------------------------------------------------------------------------------------------------------------------------------------------------------------------------------------------------------------------------------------------------------------------------------------------------------------------------------------------------------------------------------------------------------------------------------------------------------------------------------------------------------------------------------------------------------------------------------------------------------------------|
| <p><b>C3.</b> How has coronavirus or the lockdown changed <i>your child's</i> daily life? Think about from the time your child wakes up in the morning to when they go to bed at night. How is your child's day different now, if at all?</p> <p>କରୋନାଭାଇରସ କିମ୍ବା ଲକଡାଉନ ଆପଣଙ୍କ ପିଲାଙ୍କ ଦୈନିକ ଜୀବନକୁ କିପରି ବଦଳାଇ ଦେଇଛି? ସକାଳୁ ଉଠିବା ସମୟରୁ ଆରମ୍ଭ କରି ରାତିରେ ଶୋଇବାକୁ ଯିବା ପର୍ଯ୍ୟନ୍ତ ସମୟ ବିଷୟରେ ଭାବନ୍ତୁ। ବର୍ତ୍ତମାନ ଆପଣଙ୍କ ପିଲାଙ୍କ ଦିନ ଅଲଗା କିପରି, ଯଦି ଅଲଗା ହୋଇଥାଏ?</p> <p><b>Probes:</b></p> <ul style="list-style-type: none"> <li>○ Staying at home more? ଘରେ ଅଧିକ ସମୟ ରହୁଛି?</li> <li>○ Able to go to Anganwadi? ଅଙ୍ଗନବାଡ଼ି ଯାଇ ପାରୁଛି?</li> <li>○ Roaming around more/less? ଅଧିକ/କମ ବୁଲୁଛି?</li> </ul> |                                                                                                                                                                                                                                                                                                                                                                                                                                                                                                                                                                                                                                                                                                                                                                                                              |
| <p><b>C4.</b> Who typically helps you with caring for your child? For example, helps watch the child while you do something else or helps with things like bathing, feeding, dressing, and managing the child's feces.</p> <p>ସାଧାରଣତଃ, ଆପଣଙ୍କୁ ନିଜ ପିଲାଙ୍କ ଯତ୍ନ ନେବାରେ କିଏ ସାହାଯ୍ୟ କରନ୍ତି? ଉଦାହରଣ ସ୍ୱରୂପ, ଆପଣ କିଛି କାମ କଲାବେଳେ ପିଲାଙ୍କୁ ରଖନ୍ତି କିମ୍ବା ପିଲାଙ୍କୁ ଗାଧୋଇବାରେ, ଖୁଏଇବାରେ, କପଡ଼ା ପିନ୍ଧେଇବାରେ ଏବଂ ପିଲାଙ୍କ ଝାଡ଼ା ପରିଚାଳନାରେ ସାହାଯ୍ୟ।</p>                                                                                                                                                                                                                                                         | <p><b>Follow-up #1:</b><br/>How has coronavirus or the lockdown changed the help you get with childcare?</p> <p>କରୋନାଭାଇରସ କିମ୍ବା ଲକଡାଉନ ଆପଣଙ୍କ ପିଲା ଯତ୍ନ ସହ ଜଡ଼ିତ ମିଳୁଥିବା ସାହାଯ୍ୟକୁ କିପରି ପରିବର୍ତ୍ତନ କରିଛି?</p> <ul style="list-style-type: none"> <li>○ Getting more, less, or same amount of help?<br/>କମ, ସମାନ ନା ଅଧିକ ପରିମାଣର ସାହାଯ୍ୟ ମିଳୁଛି?</li> <li>○ Men in the household help more?<br/>ଘରର ପୁରୁଷମାନେ ଅଧିକ ସାହାଯ୍ୟ କରୁଛନ୍ତି?</li> <li>○ Neighbors are no longer able to help?<br/>ପଡୋଶୀ ମାନେ ଆଉ ସାହାଯ୍ୟ କରିପାରୁ ନାହାନ୍ତି?</li> </ul> <p><b>Follow-up #2:</b><br/>Due to coronavirus or the lockdown, has there been any change in who helps with managing the child's feces?</p> <p>କରୋନାଭାଇରସ କିମ୍ବା ଲକଡାଉନ ପାଇଁ, କଣ ପିଲା ଝାଡ଼ା ପରିଚାଳନାରେ କିଏ ସାହାଯ୍ୟ କରେ, ସେଥିରେ କିଛି ପରିବର୍ତ୍ତନ ଆସିଛି କି?</p> |

## COVID-19 Mobile Phone Interview – Primary Caregiver

|                                                                                                                                                                                      |                                                                                                                                                                                                                                                                                                                                                                                                                                                                                                                                                                                                                                                                                                                                                                                                                                                                                                                                                                                                                                                                                                                                                                                                                                                                                                                                          |
|--------------------------------------------------------------------------------------------------------------------------------------------------------------------------------------|------------------------------------------------------------------------------------------------------------------------------------------------------------------------------------------------------------------------------------------------------------------------------------------------------------------------------------------------------------------------------------------------------------------------------------------------------------------------------------------------------------------------------------------------------------------------------------------------------------------------------------------------------------------------------------------------------------------------------------------------------------------------------------------------------------------------------------------------------------------------------------------------------------------------------------------------------------------------------------------------------------------------------------------------------------------------------------------------------------------------------------------------------------------------------------------------------------------------------------------------------------------------------------------------------------------------------------------|
| <p><b>C5.</b> The last time your youngest child defecated, where did they defecate?</p> <p>ଶେଷ ଥର ପାଇଁ ଆପଣଙ୍କ ସବୁଠୁ ସାନ ପିଲା କେଉଁଠାରେ ଝାଡ଼ା କରିଥିଲା?</p>                             | <div style="display: flex; flex-direction: row-reverse;"> <div style="margin-right: 10px;"> <input type="checkbox"/> 1. Inside the household ଘର ଭିତରେ<br/> <input type="checkbox"/> 2. Inside household compound ଘର ଅଗଣା ଭିତରେ<br/> <input type="checkbox"/> 3. Just outside the household compound ଘର ଅଗଣାରୁ ଟିକେ ବାହାରେ<br/> <input type="checkbox"/> 4. Away from the household compound ଘର ଅଗଣା ବାହାରେ<br/> <input type="checkbox"/> 5. In latrine ପାଇଖାନା ରେ → <b>SKIP to C6</b><br/> <input type="checkbox"/> 6. In latrine but not over pan ପାଇଖାନା ଘର ରେ କିନ୍ତୁ ପ୍ୟାନ ରେ ନୁହେଁ<br/> <input type="checkbox"/> 88. Other ଅନ୍ୟାନ୍ୟ _____<br/> <input type="checkbox"/> 99. Don't know ଜାଣି ନାହିଁ </div> </div>                                                                                                                                                                                                                                                                                                                                                                                                                                                                                                                                                                                                                      |
| <p><b>C5a.</b> The last time your youngest child defecated, what did they defecate on?</p> <p>ଶେଷ ଥର ପାଇଁ ଆପଣଙ୍କ ସବୁଠୁ ଛୋଟ ପିଲା ଯେବେ ଝାଡ଼ା କରିଥିଲା, ସେ କେଉଁଥିରେ ଝାଡ଼ା କରିଥିଲେ ?</p>  | <div style="display: flex; flex-direction: row-reverse;"> <div style="margin-right: 10px;"> <input type="checkbox"/> 1. On ground directly (soil) ସିଧା ତଳେ (ମାଟିରେ )<br/> <input type="checkbox"/> 2. On ground directly (cement) ସିଧା ତଳେ (ସିମେଣ୍ଟରେ )<br/> <input type="checkbox"/> 3. On cloth on ground or other surface କପଡ଼ାରେ ତଳେ ବା ଚଟାଣ ରେ<br/> <input type="checkbox"/> 4. On cloth on bed ଖଟ ଉପରେ କପଡ଼ା ରେ<br/> <input type="checkbox"/> 5. On oil cloth on ground or other surface ତଳେ ବା ଚଟାଣ ରେ ଅଇଲ କଲଥ ଉପରେ<br/> <input type="checkbox"/> 6. On oil cloth on bed ଖଟ ଉପରେ ଅଇଲ କଲଥ ଉପରେ<br/> <input type="checkbox"/> 7. On waste newspaper/paper ପୁରୁଣା କାଗଜ/ଖାଲି କାଗଜ<br/> <input type="checkbox"/> 8. On polythene bag ପଲିଥିନ୍ ବାଗ/ବ୍ୟାଗ<br/> <input type="checkbox"/> 9. On caregiver/person holding the child ପିଲାକୁ ଯିଏ ଧରି ଥାଏ ତା ଉପରେ<br/> <input type="checkbox"/> 10. In cloth nappy କପଡ଼ା ନାପକିନ୍<br/> <input type="checkbox"/> 11. In disposable diaper (Huggies, Pampers) ଡାଲପର୍ ରେ<br/> <input type="checkbox"/> 12. In pants/clothing ପ୍ୟାଣ୍ଟ/ ପିନ୍ଧିଥିବା ଡ୍ରେସ୍ ରେ<br/> <input type="checkbox"/> 13. On dustpan ଡଷ୍ଟବିନ୍ ରେ<br/> <input type="checkbox"/> 14. In potty ପୋଟି ରେ<br/> <input type="checkbox"/> 88. Other ଅନ୍ୟାନ୍ୟ _____<br/> <input type="checkbox"/> 99. Don't know ଜାଣି ନାହିଁ </div> </div> |
| <p><b>C5b.</b> This last time your youngest child defecated, where were their feces disposed?</p> <p>ଶେଷ ଥର ପାଇଁ ଆପଣଙ୍କ ସବୁଠୁ ସାନ ପିଲା କରିଥିବା ଝାଡ଼ାକୁ କେଉଁଠାରେ ଫୋପାଡ଼ା ଯାଇଥିଲା?</p> | <div style="display: flex; flex-direction: row-reverse;"> <div style="margin-right: 10px;"> <input type="checkbox"/> 1. Into latrine ପାଇଖାନା ରେ<br/> <input type="checkbox"/> 2. Buried ଯୋଡ଼ି ଦିଆଯାଇଥିଲା<br/> <input type="checkbox"/> 3. Into backyard of household compound ଘର ଅଗଣା ପଛପଟେ<br/> <input type="checkbox"/> 4. Into household garbage pile ଘର ଆବର୍ଜନା ଜାଗାରେ<br/> <input type="checkbox"/> 5. Into household compost pile ଘର କମ୍ପୋଷ୍ଟ ରେ<br/> <input type="checkbox"/> 6. Into open field (NOT on household compound) ଖୋଲା ପଡିଆ ରେ (ଘର ଅଗଣା ନୁହେଁ )<br/> <input type="checkbox"/> 7. Into community garbage pile ଗୋଷ୍ଠି ଆବର୍ଜନା ଜାଗାରେ<br/> <input type="checkbox"/> 8. Into community compost pile ଗୋଷ୍ଠି କମ୍ପୋଷ୍ଟ ରେ<br/> <input type="checkbox"/> 9. Along roadside ରୋଡ଼ ସାଇଡ ରେ<br/> <input type="checkbox"/> 10. Into drain/ditch ନଳା ବା ଗାଡ଼ ରେ<br/> <input type="checkbox"/> 11. Washed directly in bathroom ବାଥ ରୁମ ରେ ସିଧା ଧୋଇ ଦେଲି<br/> <input type="checkbox"/> 12. Washed directly in body of water ନଦୀ,ନଳା ରେ ସିଧା ଧୋଇ ଦେଲି<br/> <input type="checkbox"/> 13. Left in open (in household compound) ଖୋଲା ରେ ଛାଡ଼ି ଦିଆଯାଇଥିଲା (ଘର ପରିସର ମଧ୍ୟରେ)<br/> <input type="checkbox"/> 88. Other ଅନ୍ୟାନ୍ୟ: _____ </div> </div>                                                                                           |

## COVID-19 Mobile Phone Interview – Primary Caregiver

|                                                                                                                                                                                                                                                                                                                                                                                                                                                                                                                                                                                                           |                                                                                                                                                                                                                                                                                                                              |
|-----------------------------------------------------------------------------------------------------------------------------------------------------------------------------------------------------------------------------------------------------------------------------------------------------------------------------------------------------------------------------------------------------------------------------------------------------------------------------------------------------------------------------------------------------------------------------------------------------------|------------------------------------------------------------------------------------------------------------------------------------------------------------------------------------------------------------------------------------------------------------------------------------------------------------------------------|
|                                                                                                                                                                                                                                                                                                                                                                                                                                                                                                                                                                                                           | <input type="checkbox"/> 99. Don't know ଜାଣି ନାହିଁ                                                                                                                                                                                                                                                                           |
| <p><b>C5c.</b> How strongly do you intend to ALWAYS dispose of your child's feces into the latrine?</p> <p>ଆପଣ କେତେ ସ୍ୱତନ୍ତ୍ର ଭାବେ ଉଦ୍ଦେଶ୍ୟ ରଖିଛନ୍ତି କି ଯେ ଆପଣଙ୍କ ପିଲାଙ୍କ ମଳ ଆପଣ ସବୁବେଳେ ପାଇଖାନାରେ ପକାଇବେ?</p> <p><b>Enumerator Notes:</b><br/>Read the response options<br/>ଉତ୍ତର ଅପସନ୍ଦ ଗୁଡ଼ିକୁ ପଢନ୍ତୁ ।</p>                                                                                                                                                                                                                                                                                            | <input type="checkbox"/> 1. Not at all ବିଲକ୍ଷ୍ମ ନୁହଁ<br><input type="checkbox"/> 2. A little ଅଳ୍ପ<br><input type="checkbox"/> 3. Medium ମଧ୍ୟମ<br><input type="checkbox"/> 4. Strongly ସ୍ୱତନ୍ତ୍ର<br><input type="checkbox"/> 5. Very strongly ବହୁତ ସ୍ୱତନ୍ତ୍ର                                                                  |
| <p><b>C6.</b> Is the location where your child defecates <i>now</i> the same or different from where your child defecated <i>before</i> coronavirus or the lockdown?</p> <p>କଣ ଆପଣଙ୍କ ପିଲାଙ୍କ ବର୍ତ୍ତମାନର ଝାଡ଼ା କରୁଥିବା ଜାଗା ; ଆପଣଙ୍କ ପିଲାଙ୍କ କରୋନାଭାଇରସ୍ କିମ୍ବା ଲକ୍ଷ୍ମୀଭୟନ ପୂର୍ବରୁ ଝାଡ଼ା କରୁଥିବା ଜାଗା ସହିତ ସମାନ ନା ଅଲଗା?</p>                                                                                                                                                                                                                                                                              | <input type="checkbox"/> 1. Same ସମାନ<br><input type="checkbox"/> 2. Different → How has the location where your child defecates changed? Why has it changed? Please explain.<br>ଅଲଗା → ଆପଣଙ୍କ ପିଲା ଝାଡ଼ା କରୁଥିବା ଜାଗାଟି କିପରି ପରିବର୍ତ୍ତିତ ହେଲା? କ୍ଷମାକରି, ବର୍ଣ୍ଣନା କରନ୍ତୁ।                                                  |
| <p><b>C7.</b> Is the location where you dispose of your child feces <i>now</i> the same or different from where you disposed of your child's feces <i>before</i> coronavirus or the lockdown?</p> <p>କଣ ସେହି ଜାଗା ଯେଉଁଠାରେ ଆପଣ ନିଜ ପିଲାଙ୍କ ଝାଡ଼ାକୁ ବର୍ତ୍ତମାନ ଫୋପାଡ଼ନ୍ତି , ଆପଣ ପୂର୍ବରୁ ନିଜ ପିଲାଙ୍କ ଝାଡ଼ାକୁ ଫୋପାଡ଼ୁଥିବା ଜାଗା ସହିତ ସମାନ ନା ଅଲଗା?</p>                                                                                                                                                                                                                                                         | <input type="checkbox"/> 1. Same ସମାନ<br><input type="checkbox"/> 2. Different → How has the location where you dispose of your child's feces changed? Why has it changed? Please explain.<br>ଅଲଗା → ଆପଣଙ୍କ ପିଲାଙ୍କ ଝାଡ଼ାକୁ ଫୋପାଡ଼ୁଥିବା ଜାଗାଟି କିପରି ପରିବର୍ତ୍ତିତ ହେଲା? ଏହା କାହିଁ ପରିବର୍ତ୍ତିତ ହେଲା? କ୍ଷମାକରି ବର୍ଣ୍ଣନା କରନ୍ତୁ। |
| <p><b>C8. *ONLY ASK if caregiver uses cloth/nappies:</b><br/>Tell me about how you wash your child's soiled cloths/nappies. How has this changed because of coronavirus or the lockdown, if it has changed?</p> <p>କେବଳ ସେବେ ପତାରିକୁ ଯେବେ ଉତ୍ତରଦାତା କପଡ଼ା/କନା ବ୍ୟବହାର କରନ୍ତି: ଆପଣ ନିଜ ପିଲାଙ୍କ ଓଦା କପଡ଼ା/ କନା କିପରି ସଫା କରନ୍ତି? ଏହା କରୋନାଭାଇରସ୍ କିମ୍ବା ଲକ୍ଷ୍ମୀଭୟନ ପାଇଁ କିପରି ବଦଳିଛି, ଯଦି ବଦଳିଛି?</p> <p><b>Probes:</b></p> <ul style="list-style-type: none"> <li>○ Change in type or amount of soap you use?<br/>ଆପଣ ବ୍ୟବହାର କରୁଥିବା ସାବୁନରେ ପରିବର୍ତ୍ତନ?</li> <li>○ Change in amount of water?</li> </ul> |                                                                                                                                                                                                                                                                                                                              |

## COVID-19 Mobile Phone Interview – Primary Caregiver

|                                                                                                                                                                                                                                                                                                                                                                                                                                                 |                                                                                                                                                                                                                                                                                                                                                                                                                                                                                                                                                                                                                                                                                                                                                                                                                                                                                                                                 |
|-------------------------------------------------------------------------------------------------------------------------------------------------------------------------------------------------------------------------------------------------------------------------------------------------------------------------------------------------------------------------------------------------------------------------------------------------|---------------------------------------------------------------------------------------------------------------------------------------------------------------------------------------------------------------------------------------------------------------------------------------------------------------------------------------------------------------------------------------------------------------------------------------------------------------------------------------------------------------------------------------------------------------------------------------------------------------------------------------------------------------------------------------------------------------------------------------------------------------------------------------------------------------------------------------------------------------------------------------------------------------------------------|
| <p>ଆପଣ ବ୍ୟବହାର କରୁଥିବା ପାଣିର ପରିମାଣରେ ପରିବର୍ତ୍ତନ?</p> <p>○ Change in <i>where</i> you go to wash?</p> <p>ଆପଣ ଧୋଇବାକୁ ଯାଉଥିବା ଜାଗାରେ ପରିବର୍ତ୍ତନ?</p>                                                                                                                                                                                                                                                                                             |                                                                                                                                                                                                                                                                                                                                                                                                                                                                                                                                                                                                                                                                                                                                                                                                                                                                                                                                 |
| <p><b>C9.</b> Are you currently teaching your youngest child how to use the latrine for defecation?</p> <p>କଣ ଆପଣ ବର୍ତ୍ତମାନ ଆପଣଙ୍କ ସବୁଠୁ ଛୋଟ ପିଲାକୁ ଝାଡ଼ା ଯିବା ପାଇଁ କିପରି ପାଇଖାନାକୁ ଯିବେ ଶିଖାଉଛନ୍ତି କି ?</p>                                                                                                                                                                                                                                    | <p><input type="checkbox"/> 1. Yes – ହଁ → <b>Ask C9a and C10</b> and complete <b>latrine training</b> questions below</p> <p><input type="checkbox"/> 2. No - my child is not old enough to start learning how to use the latrine ନା- ମୋ ପିଲା ସେତିକି ବଡ଼ ହୋଇ ନାହିଁ କି ପାଇଖାନା ବ୍ୟବହାର ଶିକ୍ଷା ଆରମ୍ଭ କରିବ → <b>Skip to C11</b> and complete <b>disposal</b> questions below</p> <p><input type="checkbox"/> 3. No – my child already knows how to use the latrine on their own ନାହିଁ- ମୋ ପିଲା ନିଜେ ପାଇଖାନା ବ୍ୟବହାର କରି ଜାଣିଛି (ପାଣି ଢାଳି ଓ ଛାଞ୍ଚେଇବା ମଧ୍ୟ ଜାଣିଛି) → <b>Skip to C15 (skip disposal and latrine training questions)</b></p> <p><input type="checkbox"/> 4. No – I am not teaching my child how to use the latrine though my child is old enough ନା- ମୁଁ ମୋ ପିଲା କୁ ପାଇଖାନା ବ୍ୟବହାରର ଶିକ୍ଷା ଦେବା ଆରମ୍ଭ କରିନାହିଁ ଯଦିଓ ମୋ ପିଲାର ବୟସ ହୋଇଯାଇଛି → <b>Ask C10</b> and complete <b>latrine training</b> questions below</p> |
| <p><b>C9a.</b><br/><b>ONLY ASK if C9 = 1</b><br/>During the last week, when your child needed to defecate, how often did you take your child to the latrine and teach them how to use it?</p> <p>ଗତ ସପ୍ତାହରେ, ଯେତେବେଳେ ଆପଣଙ୍କ ପିଲା ଝାଡ଼ା ଯିବାକୁ ଇଚ୍ଛା କରିଥିଲା, ଆପଣ ତାକୁ କେତେଥର ପାଇଖାନାକୁ ନେଇ ଯାଇଥିଲେ ଏବଂ ଏହାକୁ ବ୍ୟବହାର କରିବାକୁ ଶିଖେଇଥିଲେ?</p> <p><b>Enumerator Notes:</b><br/>Read the response options<br/>ଉତ୍ତର ଅପସନସ୍ ରୁ ଚିହ୍ନଟ କରନ୍ତୁ ।</p> | <p><input type="checkbox"/> 1. (Almost) never (0%) କେବେ ନୁହେଁ (୦%)</p> <p><input type="checkbox"/> 2. Seldom (25%) କେବେ କେବେ (୦%)</p> <p><input type="checkbox"/> 3. Sometimes (50%) କେବେ କେବେ (୫୦%)</p> <p><input type="checkbox"/> 4. Often (75%) ପ୍ରାୟତଃ (75%)</p> <p><input type="checkbox"/> 5. (Almost) always (100%) ସବୁବେଳେ (100%)</p>                                                                                                                                                                                                                                                                                                                                                                                                                                                                                                                                                                                  |
| <p><b>C10.</b> Were you teaching your youngest child how to use the latrine for defecation <i>before</i> coronavirus and the lockdown?</p> <p>କରୋନାଭାଇରସ କିମ୍ବା ଲକଡାଉନ ପୂର୍ବରୁ କଣ ଆପଣ ନିଜର ସବୁଠୁ ଛୋଟ ପିଲାକୁ ଝାଡ଼ା ଯିବା ପାଇଁ ପାଇଖାନା ବ୍ୟବହାର କରିବା ଶିଖାଉଥିଲେ କି?</p>                                                                                                                                                                             | <p><input type="checkbox"/> 1. Yes ହଁ</p> <p><input type="checkbox"/> 2. No ନାହିଁ</p> <p><b>If there is a change, ask:</b> ଯଦି କିଛି ପରିବର୍ତ୍ତନ ଅଛି, ତାହେଲେ ପଚାରନ୍ତୁ :<br/>Why did you [start / stop] teaching your child how to use the latrine?<br/>ଆପଣ ନିଜ ପିଲାକୁ କାହିଁକି ପାଇଖାନା ବ୍ୟବହାର ବିଷୟରେ ଶିଖେଇବା ଆରମ୍ଭ କିମ୍ବା ବନ୍ଦ କରିଦେଲେ?</p>                                                                                                                                                                                                                                                                                                                                                                                                                                                                                                                                                                                       |

## COVID-19 Mobile Phone Interview – Primary Caregiver

**ENUMERATOR NOTE:** Make sure you complete the correct set of either ‘disposal’ or ‘latrine training’ questions based on the respondent’s answer to C16 above.

ଏନୁମରେଟର ନୋଟ : ଏହା ନିଶ୍ଚିତ କରନ୍ତୁ କି ଯେ ଆପଣ ଉତ୍ତରଦାତାଙ୍କ C16 ପ୍ରଶ୍ନର ଉତ୍ତର ଆଧାରରେ ହିଁ ‘ନିଷ୍କାସନ’ କିମ୍ବା ‘ପାଇଖାନା ପ୍ରଶିକ୍ଷଣ’ ଭାଗର ପ୍ରଶ୍ନକୁ ସମ୍ପୂର୍ଣ୍ଣ କରିବେ।

| DISPOSAL                                                                                                                                                                                                                                                                                                                                                                                                                                                                                                  | LATRINE TRAINING                                                                                                                                                                                                                                                                                                                                                                                    |
|-----------------------------------------------------------------------------------------------------------------------------------------------------------------------------------------------------------------------------------------------------------------------------------------------------------------------------------------------------------------------------------------------------------------------------------------------------------------------------------------------------------|-----------------------------------------------------------------------------------------------------------------------------------------------------------------------------------------------------------------------------------------------------------------------------------------------------------------------------------------------------------------------------------------------------|
| <p><b>C11. RISKS</b></p> <ul style="list-style-type: none"> <li>Do you think a baby’s feces (&lt;1 year old) can make someone sick? Why or why not?<br/>ଆପଣଙ୍କୁ ଲାଗୁଛି କି ଯେ ଏକ ଶିଶୁର ଝାଡ଼ା (ଏକ ବର୍ଷରୁ କମ) କାହାକୁ ଅସୁସ୍ଥ କରିପାରେ? କାହିଁକି ଏବଂ କାହିଁକି ନୁହେଁ?</li> <li>Do you think a child’s feces (1 to &lt;5 year old) can make someone sick? Why or why not?<br/>ଆପଣଙ୍କୁ ଲାଗୁଛି କି ଯେ ଏକ ପିଲାଙ୍କ ଝାଡ଼ା (ଏକ ବର୍ଷରୁ ଅଧିକ ଓ ପାଞ୍ଚ ବର୍ଷରୁ କମ) କାହାକୁ ଅସୁସ୍ଥ କରିପାରେ? କାହିଁକି ଏବଂ କାହିଁକି ନୁହେଁ?</li> </ul> | <p><b>C11. RISKS</b></p> <ul style="list-style-type: none"> <li>What concerns do you have when your child uses the latrine for defecation?<br/>ଯେତେବେଳେ ଆପଣଙ୍କ ପିଲା ଝାଡ଼ା ଯିବା ପାଇଁ ପାଇଖାନା ବ୍ୟବହାର କରେ, ଆପଣଙ୍କର କଣ ଆଶଙ୍କା ଥାଏ?</li> <li>What concerns do you have when your child goes out for defecation?<br/>ଯେତେବେଳେ ଆପଣଙ୍କ ପିଲା ଝାଡ଼ା ଯିବା ପାଇଁ ବାହାରକୁ ଯାଏ, ଆପଣଙ୍କର କଣ ଆଶଙ୍କା ଥାଏ?</li> </ul> |
| <p><b>C12. ATTITUDES</b></p> <ul style="list-style-type: none"> <li>What are the <b>good things</b> about managing your child’s feces?<br/>ଆପଣଙ୍କୁ ନିଜ ପିଲାଙ୍କ ଝାଡ଼ା ପରିଚାଳନାରେ କଣ ଭଲ ଲାଗେ?</li> <li>What are the <b>bad things</b>?<br/>କଣ ଖରାପ ଲାଗେ?</li> </ul>                                                                                                                                                                                                                                         | <p><b>C12. ATTITUDES</b></p> <ul style="list-style-type: none"> <li>What are the <b>good things</b> about teaching your child how to use the latrine for defecation?<br/>ଆପଣଙ୍କୁ ନିଜ ପିଲାଙ୍କୁ ପାଇଖାନାକୁ ଝାଡ଼ା ଯିବାପାଇଁ ବ୍ୟବହାର କରିବାରେ ଶିକ୍ଷା ଦେବାରେ କଣ ଭଲ ଲାଗେ?</li> <li>What are the <b>bad things</b>?<br/>କଣ ଖରାପ ଲାଗେ?</li> </ul>                                                              |
| <p><b>C13. ABILITY</b><br/>Due to coronavirus or the lockdown, what challenges are you facing with managing your child’s feces?<br/>Any challenges with disposal?</p> <p>କରୋନାଭାଇରସ କିମ୍ବା ଲକଡାଉନ ପାଇଁ, ଆପଣ ନିଜ ପିଲାଙ୍କ ଝାଡ଼ାକୁ ପରିଚାଳନା କରିବାରେ କେଉଁ କେଉଁ ସମସ୍ୟାର ସାମ୍ନା କରନ୍ତି? ଫୋପାଡ଼ିବାକୁ ନେଇ କିଛି ସମସ୍ୟା?</p>                                                                                                                                                                                        | <p><b>C13. ABILITY</b><br/>Due to coronavirus or the lockdown, what challenges are you facing with teaching your child how to use the latrine for defecation?</p> <p>କରୋନାଭାଇରସ କିମ୍ବା ଲକଡାଉନ ପାଇଁ, ଆପଣ ନିଜ ପିଲାଙ୍କୁ ପାଇଖାନାକୁ ଝାଡ଼ା ଯିବା ପାଇଁ ବ୍ୟବହାର କରିବାରେ ଶିକ୍ଷା ଦେବାରେ କେଉଁ କେଉଁ ସମସ୍ୟାର ସାମ୍ନା କରନ୍ତି?</p>                                                                                   |



## COVID-19 Mobile Phone Interview – Primary Caregiver

|                                                                                                                                                                                                                                                                                                                                                                                                                                                                                                                                                                                                                                                                     |                                                                                                                                                                                                                                                                                                                                                                                                                                                                                                                                                                                                                                                                              |
|---------------------------------------------------------------------------------------------------------------------------------------------------------------------------------------------------------------------------------------------------------------------------------------------------------------------------------------------------------------------------------------------------------------------------------------------------------------------------------------------------------------------------------------------------------------------------------------------------------------------------------------------------------------------|------------------------------------------------------------------------------------------------------------------------------------------------------------------------------------------------------------------------------------------------------------------------------------------------------------------------------------------------------------------------------------------------------------------------------------------------------------------------------------------------------------------------------------------------------------------------------------------------------------------------------------------------------------------------------|
| <p><b>Probes:</b></p> <p>-Less help with caring for child?<br/>ପିଲାଙ୍କ ଯତ୍ନରେ କମ ସାହାଯ୍ୟ?</p> <p>-More workload now? ବର୍ତ୍ତମାନ ଅଧିକ କାମ?</p>                                                                                                                                                                                                                                                                                                                                                                                                                                                                                                                        | <p><b>Probes:</b></p> <p>-Less help with teaching child? ପିଲାଙ୍କୁ ଶିଖେଇବାରେ କମ ସାହାଯ୍ୟ?</p> <p>-Child has become more difficult? ପିଲାଟି ଦୁଷ୍ଟ ହୋଇଯାଇଛି କି?</p> <p>-More workload now? ବର୍ତ୍ତମାନ ଅଧିକ କାମ?</p>                                                                                                                                                                                                                                                                                                                                                                                                                                                                |
| <p><b>C14a. NORMS</b></p> <p>Due to coronavirus or the lockdown, do you think people in this village are disposing of their child's feces into the latrine more, less, or there has been no change?</p> <p>କରୋନାଭାଇରସ କିମ୍ବା ଲକଡାଉନ ପାଇଁ, ଆପଣ ଭାବୁଛନ୍ତି କି ଯେ ଏଇ ଗାଁ ର ଲୋକ ମାନେ ନିଜ ପିଲାଙ୍କ ଝାଡ଼ାକୁ ଲାଟ୍ରିନରେ ଅଧିକ ଫୋପାଡୁଛନ୍ତି, କମ କିମ୍ବା କିଛି ପରିବର୍ତ୍ତନ ହୋଇନାହିଁ?</p> <p><input type="checkbox"/> 1. More ଅଧିକ</p> <p><input type="checkbox"/> 2. Less କମ</p> <p><input type="checkbox"/> 3. No change କିଛି ପରିବର୍ତ୍ତନ ନୁହେଁ</p> <p><input type="checkbox"/> 99. Don't know ଜାଣିନାହିଁ</p> <p><b><u>Please explain why:</u></b> ଦୟାକରି ବର୍ଣ୍ଣନା କରନ୍ତୁ କାହିଁକି</p> | <p><b>C14a. NORMS</b></p> <p>Due to coronavirus or the lockdown, do you think people in this village are teaching their children to defecate in the latrine more, less, or there has been no change?</p> <p>କରୋନାଭାଇରସ କିମ୍ବା ଲକଡାଉନ ପାଇଁ, ଆପଣ ଭାବୁଛନ୍ତି କି ଯେ ଏଇ ଗାଁ ର ଲୋକ ମାନେ ନିଜ ପିଲାଙ୍କୁ ପାଇଖାନାରେ ଝାଡ଼ା ଯିବା ପାଇଁ ଅଧିକ ଶିଖାଉଛନ୍ତି, କମ କିମ୍ବା କିଛି ପରିବର୍ତ୍ତନ ହୋଇନାହିଁ?</p> <p><input type="checkbox"/> 1. More ଅଧିକ</p> <p><input type="checkbox"/> 2. Less କମ</p> <p><input type="checkbox"/> 3. No change କିଛି ପରିବର୍ତ୍ତନ ନୁହେଁ</p> <p><input type="checkbox"/> 99. Don't know ଜାଣିନାହିଁ</p> <p><b><u>Please explain why:</u></b> ଦୟାକରି ବର୍ଣ୍ଣନା କରନ୍ତୁ କାହିଁକି</p> |
| <p><b>C14b. NORMS</b></p> <p>Due to coronavirus or the lockdown, do your household members now expect you to dispose of your child's feces into the latrine? Why or why not?</p> <p>କରୋନାଭାଇରସ କିମ୍ବା ଲକଡାଉନ ପାଇଁ କଣ ଆପଣଙ୍କ ଘରର ସଦସ୍ୟମାନେ ଆପଣଙ୍କ ଠାରୁ ଏହି ଆଶା କରୁଛନ୍ତି କି ଯେ ବର୍ତ୍ତମାନ ଆପଣ ନିଜ ପିଲାଙ୍କ ଝାଡ଼ାକୁ ଲାଟ୍ରିନରେ ଫୋପାଡନ୍ତୁ? କାହିଁକି ଏବଂ କାହିଁକି ନୁହେଁ?</p>                                                                                                                                                                                                                                                                                                  | <p><b>C14b. NORMS</b></p> <p>Due to coronavirus or the lockdown, do your household members expect you to now teach your child how to use the latrine for defecation? Why or why not?</p> <p>କରୋନାଭାଇରସ କିମ୍ବା ଲକଡାଉନ ପାଇଁ, କଣ ଆପଣଙ୍କ ଘରର ସଦସ୍ୟମାନେ ଆପଣଙ୍କ ଠାରୁ ଏହି ଆଶା କରୁଛନ୍ତି କି ଯେ ଆପଣ ବର୍ତ୍ତମାନ ନିଜ ପିଲାଙ୍କୁ ପାଇଖାନାକୁ ଝାଡ଼ା ଯିବା ପାଇଁ ବ୍ୟବହାର କରିବାର ଶିକ୍ଷା ଦିଅନ୍ତୁ? କାହିଁକି ଏବଂ କାହିଁକି ନୁହେଁ?</p>                                                                                                                                                                                                                                                                     |

## COVID-19 Mobile Phone Interview – Primary Caregiver

|                                                                                                                                                                                                                                                                                                                                                                                                                                                        |                                                                                                                                                                                                                                                                                                                                                 |
|--------------------------------------------------------------------------------------------------------------------------------------------------------------------------------------------------------------------------------------------------------------------------------------------------------------------------------------------------------------------------------------------------------------------------------------------------------|-------------------------------------------------------------------------------------------------------------------------------------------------------------------------------------------------------------------------------------------------------------------------------------------------------------------------------------------------|
| <p><b>ENUMERATOR READ:</b> Thank you for your responses so far. Now I'm going to ask you some questions about how coronavirus has impacted other aspects of your daily life.</p> <p>ଏନୁମରେଟର ପଢନ୍ତୁ: ବର୍ତ୍ତମାନ ପର୍ଯ୍ୟନ୍ତ ଦେଇଥିବା ଆପଣଙ୍କ ଉତ୍ତର ପାଇଁ ଧନ୍ୟବାଦ। ମୁଁ ବର୍ତ୍ତମାନ କିଛି ପ୍ରଶ୍ନ କରୋନାଭାଇରସ ଆପଣଙ୍କ ଜୀବନର ଅନ୍ୟ ଦିଗଗୁଡ଼ିକୁ କିପରି ପ୍ରଭାବିତ କରିଛି, ସେ ବିଷୟରେ ପଚାରିବି।</p>                                                                             |                                                                                                                                                                                                                                                                                                                                                 |
| <p><b>C15.</b> The last time you defecated, did you defecate in the open or use the latrine?</p> <p>କଣ ଶେଷ ଥର ଯେବେ ଆପଣ ଝାଡ଼ା ଯାଇଥିଲେ, ତେବେ ଆପଣ ଖୋଲା ରେ ଝାଡ଼ା ଯାଇଥିଲେ ନା ପାଇଖାନା ବ୍ୟବହାର କରିଥିଲେ?</p>                                                                                                                                                                                                                                                   | <p><input type="checkbox"/> 1. Open ଖୋଲା ରେ</p> <p><input type="checkbox"/> 2. Latrine ପାଇଖାନା ରେ</p> <p><input type="checkbox"/> 3. Somewhere else (not open field or latrine) ଅଲଗା କେଉଁଠି (ଖୋଲା ପଡିଆ ନୁହେଁ କିମ୍ବା ପାଇଖାନା ନୁହେଁ)</p> <p><input type="checkbox"/> 99. Don't know ଜାଣିନାହିଁ</p>                                                 |
| <p><b>C16.</b> Has coronavirus or the lockdown changed the <b>defecation location of you or any family members?</b> Please explain.</p> <p>କଣ କରୋନାଭାଇରସ କିମ୍ବା ଲକଡାଉନ ଆପଣ କିମ୍ବା ଆପଣଙ୍କ କେହି ପରିବାର ସଦସ୍ୟଙ୍କ ଝାଡ଼ା ଯିବା ଜାଗାକୁ ବଦଳେଇଛି କି? ଯଦି ହଁ, ବର୍ଣ୍ଣନା କରନ୍ତୁ କିପରି।</p> <p><b>Probe:</b> Have there been any changes for <b>elderly adults</b> in your household?</p> <p>ଆପଣଙ୍କ ଘରର ବୃଦ୍ଧ ବ୍ୟକ୍ତିଙ୍କ କ୍ଷେତ୍ରରେ କିଛି ପରିବର୍ତ୍ତନ ଆସିଛି କି?</p>    | <p><input type="checkbox"/> 1. Yes ହଁ</p> <p><input type="checkbox"/> 2. No ନାହିଁ</p> <p><b><u>Please explain. ବର୍ଣ୍ଣନା କରନ୍ତୁ</u></b></p>                                                                                                                                                                                                      |
| <p><b>C17.</b> Due to coronavirus or the lockdown, do you think people in this village are defecating in the open more, defecating in a latrine more, or there has been no change in where people defecate? Explain why</p> <p>ଆପଣ ଭାବୁଛନ୍ତି କି ଯେ, କରୋନାଭାଇରସ କିମ୍ବା ଲକଡାଉନ ପାଇଁ ଆପଣଙ୍କ ଗ୍ରାମର ଲୋକମାନେ, ଖୋଲାରେ ଅଧିକ ଝାଡ଼ା ଯାଉଛନ୍ତି, ଲାଟ୍ରିନରେ ଅଧିକ ଝାଡ଼ା ଯାଉଛନ୍ତି ନା ଲୋକ ଝାଡ଼ା କରୁଥିବା ଜାଗାରେ କୌଣସି ପରିବର୍ତ୍ତନ ଆସିନାହିଁ? ବର୍ଣ୍ଣନା କରନ୍ତୁ କଣ ପାଇଁ।</p> | <p><input type="checkbox"/> 1. More open defecation ଖୋଲାରେ ଝାଡ଼ା ଯିବା ବଢିଛି</p> <p><input type="checkbox"/> 2. More latrine use ଲାଟ୍ରିନ ବ୍ୟବହାର ବଢିଛି</p> <p><input type="checkbox"/> 3. No change କିଛି ପରିବର୍ତ୍ତନ ନୁହେଁ</p> <p><input type="checkbox"/> 99. Don't know ଜାଣିନାହିଁ</p> <p><b><u>Explain why: ବର୍ଣ୍ଣନା କରନ୍ତୁ କାହିଁକି</u></b></p> |
| <p><b>C18.</b> Has coronavirus or the lockdown changed your handwashing practices? Please explain.</p> <p>କଣ କରୋନାଭାଇରସ କିମ୍ବା ଲକଡାଉନ ଆପଣଙ୍କ ହାତଧୁଆ ପ୍ରକ୍ରିୟାକୁ ବଦଳେଇଛି? ବର୍ଣ୍ଣନା କରନ୍ତୁ।</p> <p><b>Probes:</b><br/><b>Has there been any change in how often you wash your hands?</b><br/>କଣ ଆପଣ ପ୍ରାୟତଃ କେତେଥର ହାତ ଧୁଅନ୍ତି, ସେଥିରେ କିଛି ପରିବର୍ତ୍ତନ ଆସିଛି କି ?</p>                                                                                    | <p><input type="checkbox"/> 1. Yes ହଁ</p> <p><input type="checkbox"/> 2. No ନାହିଁ</p> <p><b><u>Please explain. ବର୍ଣ୍ଣନା କରନ୍ତୁ</u></b></p>                                                                                                                                                                                                      |

## COVID-19 Mobile Phone Interview – Primary Caregiver

|                                                                                                                                                                                                                                                                                                                                                                                                                            |                                                                                                                                                                                                                                                                                                                                                                                                                                                                                                                                                                                                                                                                                                                                                                                                                   |
|----------------------------------------------------------------------------------------------------------------------------------------------------------------------------------------------------------------------------------------------------------------------------------------------------------------------------------------------------------------------------------------------------------------------------|-------------------------------------------------------------------------------------------------------------------------------------------------------------------------------------------------------------------------------------------------------------------------------------------------------------------------------------------------------------------------------------------------------------------------------------------------------------------------------------------------------------------------------------------------------------------------------------------------------------------------------------------------------------------------------------------------------------------------------------------------------------------------------------------------------------------|
| <p><b>Has there been any change in how much soap or water you use to wash your hands?</b><br/> କଣ ଆପଣ ପ୍ରାୟତଃ କେତେ ପରିମାଣର ସାବୁନ କିମ୍ବା ପାଣି ବ୍ୟବହାର କରନ୍ତି, ସେଥିରେ କିଛି ପରିବର୍ତ୍ତନ ଆସିଛି କି?</p>                                                                                                                                                                                                                          |                                                                                                                                                                                                                                                                                                                                                                                                                                                                                                                                                                                                                                                                                                                                                                                                                   |
| <p><b>C19. Has coronavirus or the lockdown changed the handwashing practices for any young children (&lt;5 years) in your household? Please explain.</b><br/><br/> କଣ କରୋନାଭାଇରସ କିମ୍ବା ଲକଡାଉନ ଆପଣଙ୍କ ଘରର 5 ବର୍ଷରୁ କମ ବୟସର କେହି ପିଲାଙ୍କ ହାତଧୁଆ ପ୍ରକ୍ରିୟାକୁ ବଦଳାଇଛି କି?<br/> ଦୟାକରି ବର୍ଣ୍ଣନା କରନ୍ତୁ।</p>                                                                                                                    | <div style="margin-bottom: 10px;"> <input type="checkbox"/> 1. Yes ହଁ<br/> <input type="checkbox"/> 2. No ନାହିଁ </div> <p><b><u>Please explain. ଦୟାକରି ବର୍ଣ୍ଣନା କରନ୍ତୁ</u></b></p>                                                                                                                                                                                                                                                                                                                                                                                                                                                                                                                                                                                                                                |
| <p><b>C20. In the past 7 days, have you had any difficulties with getting the water that you need for your household? Please explain.</b><br/><br/> କରୋନାଭାଇରସ କିମ୍ବା ଲକଡାଉନ ପାଇଁ ଗତ ସାତ ଦିନ ମଧ୍ୟରେ, କଣ ଆପଣଙ୍କୁ ନିଜ ଘରର ଆବଶ୍ୟକତା ପାଇଁ ଦରକାର ହେଉଥିବା ପାଣି ମିଳିବାରେ କିଛି ଅସୁବିଧା ହେଇଛି କି ?</p>                                                                                                                              | <div style="margin-bottom: 10px;"> <input type="checkbox"/> 1. Yes ହଁ<br/> <input type="checkbox"/> 2. No ନାହିଁ </div> <p><b><u>Please explain. ଦୟାକରି ବର୍ଣ୍ଣନା କରନ୍ତୁ</u></b></p>                                                                                                                                                                                                                                                                                                                                                                                                                                                                                                                                                                                                                                |
| <p><b>C21. Has coronavirus or the lockdown changed your drinking water practices such as where you get your water, how you store it, and whether or not you clean/treat the water? Please explain.</b><br/><br/> କଣ କରୋନାଭାଇରସ କିମ୍ବା ଲକଡାଉନ ଆପଣଙ୍କ ପାଣି ପିଇବା ସହିତ ଜଡ଼ିତ ପ୍ରକ୍ରିୟା ମାନଙ୍କୁ ବଦଳାଇଛି କି, ଯେପରିକି ଆପଣ ପାଣି କେଉଁଠାରୁ ଆଣନ୍ତି, ତାକୁ କିପରି ରଖନ୍ତି କିମ୍ବା କିପରି ପରିଷ୍କାର କରନ୍ତି?<br/> ଦୟାକରି ବର୍ଣ୍ଣନା କରନ୍ତୁ।</p> | <p>Change in <b>where you get</b> your drinking water?<br/> ଆପଣ ପିଇବା ପାଣି ଆଣୁଥିବା ସ୍ଥାନରେ ପରିବର୍ତ୍ତନ?</p> <div style="margin-bottom: 10px;"> <input type="checkbox"/> 1. Yes ହଁ<br/> <input type="checkbox"/> 2. No ନାହିଁ </div> <p>Change in <b>how you store</b> your drinking water?<br/> ଆପଣ କିପରି ପିଇବା ପାଣିକୁ ରଖନ୍ତି, ସେଥିରେ ପରିବର୍ତ୍ତନ?</p> <div style="margin-bottom: 10px;"> <input type="checkbox"/> 1. Yes ହଁ<br/> <input type="checkbox"/> 2. No ନାହିଁ </div> <p>Change in whether or not you <b>clean/treat</b> your drinking water?<br/> ଆପଣ ନିଜ ପିଇବା ପାଣିକୁ କିପରି ସଫା/ପରିଷ୍କାର କରନ୍ତି, ସେଥିରେ ପରିବର୍ତ୍ତନ?</p> <div style="margin-bottom: 10px;"> <input type="checkbox"/> 1. Yes ହଁ<br/> <input type="checkbox"/> 2. No ନାହିଁ </div> <p><b><u>Please explain. ଦୟାକରି ବର୍ଣ୍ଣନା କରନ୍ତୁ</u></b></p> |

## COVID-19 Mobile Phone Interview – Primary Caregiver

|                                                                                                                                                                                                                                                                                                                                                                                                                                                                                                                                                                                                                                                 |                                                                                                                                                                                                   |
|-------------------------------------------------------------------------------------------------------------------------------------------------------------------------------------------------------------------------------------------------------------------------------------------------------------------------------------------------------------------------------------------------------------------------------------------------------------------------------------------------------------------------------------------------------------------------------------------------------------------------------------------------|---------------------------------------------------------------------------------------------------------------------------------------------------------------------------------------------------|
| <p><b>C22.</b> Has coronavirus or the lockdown changed your <b>household cleaning practices</b>? Please explain.</p> <p>କଣ କରୋନାଭାଇରସ କିମ୍ବା ଲକ୍ଡାଉନ ଆପଣଙ୍କ ଘର ସଫା କରିବା ପ୍ରକ୍ରିୟାକୁ ବଦଳେଇଛି? ଦୟାକରି ବର୍ଣ୍ଣନା କରନ୍ତୁ</p> <p><b>Probes:</b> Has there been any change in <b>how often</b> you clean your home?</p> <p>କଣ ଆପଣ ପ୍ରାୟତଃ କେତେଥର ଘର ସଫା କରନ୍ତି, ସେଥିରେ କିଛି ପରିବର୍ତ୍ତନ ଆସିଛି କି ?</p> <p>Has there been any change in <b>how much detergent/disinfectant or water you use</b> to clean your home?</p> <p>କଣ ଆପଣ ଘର ସଫା କରିବା ପାଇଁ ପ୍ରାୟତଃ ଯେତେ ଲୁଗାଧୁଆ ପାଉଁଶ/ ଫିନାଇଲ କିମ୍ବା ପାଣି ବ୍ୟବହାର କରନ୍ତି, ସେଥିରେ କିଛି ପରିବର୍ତ୍ତନ ହେଇଛି କି?</p> | <div style="margin-bottom: 10px;"> <input type="checkbox"/> 1. Yes ହଁ             <input type="checkbox"/> 2. No ନାହିଁ         </div> <p><b><u>Please explain.</u></b> ଦୟାକରି ବର୍ଣ୍ଣନା କରନ୍ତୁ</p> |
| <p><b>END OF INTERVIEW:</b> Thank the respondent for their time and give them the COVID-19 information and resources summary provided by Gram Vikas.</p> <p>ସାକ୍ଷାତକାରର ଶେଷ: ଉତ୍ତରଦାତାଙ୍କୁ ତାଙ୍କ ସମୟ ପାଇଁ ଧନ୍ୟବାଦ ଜଣାନ୍ତୁ ଏବଂ ତାଙ୍କୁ ଗ୍ରାମବିକାଶ ଦ୍ୱାରା ଦିଆଯାଇଥିବା COVID-19 ସୂଚନା ବିଷୟରେ ଅବଗତ କରନ୍ତୁ</p>                                                                                                                                                                                                                                                                                                                                         |                                                                                                                                                                                                   |
| <p><b>End Time</b><br/>ଶେଷ ସମୟ</p>                                                                                                                                                                                                                                                                                                                                                                                                                                                                                                                                                                                                              |                                                                                                                                                                                                   |
